# Supplementary material
Source: PubMed Central journal article supplement (PMC4744099)
Supplement: NIHMS726517-supplement-3.pdf [file NIHMS726517-supplement-3.pdf]

Supplementary Table 1: Summary of study cohort and tumor types analyzed

| Tumor Type                          | Tumor Type Abbreviation | Anatomical System | Total number of mutations | Total number of samples † | Total number of substitutions utilized in this study | Data Source *                                                                                                                                                                                                                                                                                                                                                                                                                                                                                                                                                                                                                                                                                                                                                                                                                                                                                                                                                                                                                                                                                                                                                                                                                                                                                                                                                      |
|-------------------------------------|-------------------------|-------------------|---------------------------|---------------------------|------------------------------------------------------|--------------------------------------------------------------------------------------------------------------------------------------------------------------------------------------------------------------------------------------------------------------------------------------------------------------------------------------------------------------------------------------------------------------------------------------------------------------------------------------------------------------------------------------------------------------------------------------------------------------------------------------------------------------------------------------------------------------------------------------------------------------------------------------------------------------------------------------------------------------------------------------------------------------------------------------------------------------------------------------------------------------------------------------------------------------------------------------------------------------------------------------------------------------------------------------------------------------------------------------------------------------------------------------------------------------------------------------------------------------------|
| Glioblastoma                        | gbm                     | Brain             | 46,277                    | 412                       | 43,159                                               | 1, <a href="https://tcga-data.nci.nih.gov/tcgafiles/ftp_auth/distro_ftpusers/anonymous/tumor/gbm/gsc/broad.mit.edu/illumina_gnaseq/mutations/broad.mit.edu_GBM.IlluminaGA_DNASeq.Level_2.1.1.0/gbm_liftover.aggregated.capture.tcga.uuid.somatic.maf">https://tcga-data.nci.nih.gov/tcgafiles/ftp_auth/distro_ftpusers/anonymous/tumor/gbm/gsc/broad.mit.edu/illumina_gnaseq/mutations/broad.mit.edu_GBM.IlluminaGA_DNASeq.Level_2.1.1.0/gbm_liftover.aggregated.capture.tcga.uuid.somatic.maf</a>                                                                                                                                                                                                                                                                                                                                                                                                                                                                                                                                                                                                                                                                                                                                                                                                                                                                 |
| High Grade Pontine Glioma           | hgg                     | Brain             | 1,501                     | 71                        | 1,368                                                | 2                                                                                                                                                                                                                                                                                                                                                                                                                                                                                                                                                                                                                                                                                                                                                                                                                                                                                                                                                                                                                                                                                                                                                                                                                                                                                                                                                                  |
| Brain Lower Grade Glioma            | lgg                     | Brain             | 15,516                    | 312                       | 12,101                                               | 3, <a href="https://tcga-data.nci.nih.gov/tcgafiles/ftp_auth/distro_ftpusers/anonymous/tumor/lgg/gsc/broad.mit.edu/illumina_gnaseq/mutations/broad.mit.edu_LGG.IlluminaGA_DNASeq_curated.Level_2.1.2.0/TCGA_FREEZE_FINAL_ULTRAMUT_REMOVED.aggregated.capture.tcga.uuid.curated.somatic.maf">https://tcga-data.nci.nih.gov/tcgafiles/ftp_auth/distro_ftpusers/anonymous/tumor/lgg/gsc/broad.mit.edu/illumina_gnaseq/mutations/broad.mit.edu_LGG.IlluminaGA_DNASeq_curated.Level_2.1.2.0/TCGA_FREEZE_FINAL_ULTRAMUT_REMOVED.aggregated.capture.tcga.uuid.curated.somatic.maf</a>                                                                                                                                                                                                                                                                                                                                                                                                                                                                                                                                                                                                                                                                                                                                                                                     |
| Medulloblastoma                     | mbl                     | Brain             | 4,311                     | 301                       | 4,030                                                | 4,5,6,7                                                                                                                                                                                                                                                                                                                                                                                                                                                                                                                                                                                                                                                                                                                                                                                                                                                                                                                                                                                                                                                                                                                                                                                                                                                                                                                                                            |
| Neuroblastoma                       | nbl                     | Brain             | 4,991                     | 275                       | 4,958                                                | 8,9,10                                                                                                                                                                                                                                                                                                                                                                                                                                                                                                                                                                                                                                                                                                                                                                                                                                                                                                                                                                                                                                                                                                                                                                                                                                                                                                                                                             |
| Pilocytic Astrocytoma               | pias                    | Brain             | 117                       | 46                        | 107                                                  | 5,11                                                                                                                                                                                                                                                                                                                                                                                                                                                                                                                                                                                                                                                                                                                                                                                                                                                                                                                                                                                                                                                                                                                                                                                                                                                                                                                                                               |
| Breast Invasive Carcinoma           | brca                    | Breast            | 105,090                   | 1,304                     | 90,174                                               | 12,13,14,15,16, <a href="https://tcga-data.nci.nih.gov/tcgafiles/ftp_auth/distro_ftpusers/anonymous/tumor/brca/gsc/genome.wustl.edu/illumina_gnaseq/mutations/genome.wustl.edu_BRCA.IlluminaGA_DNASeq.Level_2.1.1.0/genome.wustl.edu_BRCA.IlluminaGA_DNASeq.Level_2.1.1.0.curated.somatic.maf">https://tcga-data.nci.nih.gov/tcgafiles/ftp_auth/distro_ftpusers/anonymous/tumor/brca/gsc/genome.wustl.edu/illumina_gnaseq/mutations/genome.wustl.edu_BRCA.IlluminaGA_DNASeq.Level_2.1.1.0/genome.wustl.edu_BRCA.IlluminaGA_DNASeq.Level_2.1.1.0.curated.somatic.maf</a>                                                                                                                                                                                                                                                                                                                                                                                                                                                                                                                                                                                                                                                                                                                                                                                            |
| Colorectal Carcinoma                | coadread                | Gastrointestinal  | 250,270                   | 594                       | 208,509                                              | 17,18, <a href="https://tcga-data.nci.nih.gov/tcgafiles/ftp_auth/distro_ftpusers/anonymous/tumor/coad/gsc/hgsc.bcm.edu/illumina_gnaseq/mutations/hgsc.bcm.edu_COAD.IlluminaGA_DNASeq.Level_2.1.5.0/hgsc.bcm.edu_COAD.IlluminaGA_DNASeq.1.somatic.maf,coad/gsc/hgsc.bcm.edu/solid_dnaseq/mutations/hgsc.bcm.edu_COAD.SOLiD_DNASeq.Level_2.1.7.0/hgsc.bcm.edu_COAD.SOLiD_DNASeq.1.somatic.maf,read/gsc/hgsc.bcm.edu/illumina_gnaseq/mutations/hgsc.bcm.edu_READ.IlluminaGA_DNASeq.Level_2.1.6.0/hgsc.bcm.edu_READ.IlluminaGA_DNASeq.1.somatic.maf,read/gsc/hgsc.bcm.edu/solid_dnaseq/mutations/hgsc.bcm.edu_READ.SOLiD_DNASeq.Level_2.1.7.0/hgsc.bcm.edu_READ.SOLiD_DNASeq.1.somatic.maf">https://tcga-data.nci.nih.gov/tcgafiles/ftp_auth/distro_ftpusers/anonymous/tumor/coad/gsc/hgsc.bcm.edu/illumina_gnaseq/mutations/hgsc.bcm.edu_COAD.IlluminaGA_DNASeq.Level_2.1.5.0/hgsc.bcm.edu_COAD.IlluminaGA_DNASeq.1.somatic.maf,coad/gsc/hgsc.bcm.edu/solid_dnaseq/mutations/hgsc.bcm.edu_COAD.SOLiD_DNASeq.Level_2.1.7.0/hgsc.bcm.edu_COAD.SOLiD_DNASeq.1.somatic.maf,read/gsc/hgsc.bcm.edu/illumina_gnaseq/mutations/hgsc.bcm.edu_READ.IlluminaGA_DNASeq.Level_2.1.6.0/hgsc.bcm.edu_READ.IlluminaGA_DNASeq.1.somatic.maf,read/gsc/hgsc.bcm.edu/solid_dnaseq/mutations/hgsc.bcm.edu_READ.SOLiD_DNASeq.Level_2.1.7.0/hgsc.bcm.edu_READ.SOLiD_DNASeq.1.somatic.maf</a> |
| Gallbladder Carcinoma               | gbc                     | Gastrointestinal  | 2,082                     | 32                        | 1,825                                                | 19                                                                                                                                                                                                                                                                                                                                                                                                                                                                                                                                                                                                                                                                                                                                                                                                                                                                                                                                                                                                                                                                                                                                                                                                                                                                                                                                                                 |
| Liver Hepatocellular Carcinoma      | lihc                    | Gastrointestinal  | 126,393                   | 539                       | 100,240                                              | 5,20,21, <a href="https://tcga-data.nci.nih.gov/tcgafiles/ftp_auth/distro_ftpusers/anonymous/tumor/lihc/gsc/hgsc.bcm.edu/mixed_dnaseq_curated/mutations/hgsc.bcm.edu_LIHC.Mixed_DNASeq_curated.Level_2.1.2.0/hgsc.bcm.edu_LIHC.IlluminaGA_DNASeq.1.somatic.maf">https://tcga-data.nci.nih.gov/tcgafiles/ftp_auth/distro_ftpusers/anonymous/tumor/lihc/gsc/hgsc.bcm.edu/mixed_dnaseq_curated/mutations/hgsc.bcm.edu_LIHC.Mixed_DNASeq_curated.Level_2.1.2.0/hgsc.bcm.edu_LIHC.IlluminaGA_DNASeq.1.somatic.maf</a>                                                                                                                                                                                                                                                                                                                                                                                                                                                                                                                                                                                                                                                                                                                                                                                                                                                   |
| Pancreatic Adenocarcinoma           | paad                    | Gastrointestinal  | 72,441                    | 417                       | 46,951                                               | 22,23, <a href="https://tcga-data.nci.nih.gov/tcgafiles/ftp_auth/distro_ftpusers/anonymous/tumor/paad/gsc/broad.mit.edu/illumina_gnaseq_automated/mutations/broad.mit.edu_PAAD.IlluminaGA_DNASeq_automated.Level_2.1.5.0/PR_TCGA_PAAD_PAIR_Capture_All_Pairs_QCPASS_v5.aggregated.capture.tcga.uuid.automated.somatic.maf">https://tcga-data.nci.nih.gov/tcgafiles/ftp_auth/distro_ftpusers/anonymous/tumor/paad/gsc/broad.mit.edu/illumina_gnaseq_automated/mutations/broad.mit.edu_PAAD.IlluminaGA_DNASeq_automated.Level_2.1.5.0/PR_TCGA_PAAD_PAIR_Capture_All_Pairs_QCPASS_v5.aggregated.capture.tcga.uuid.automated.somatic.maf</a>                                                                                                                                                                                                                                                                                                                                                                                                                                                                                                                                                                                                                                                                                                                           |
| Pancreatic Neuroendocrine Carcinoma | pannet                  | Gastrointestinal  | 115                       | 10                        | 114                                                  | 24                                                                                                                                                                                                                                                                                                                                                                                                                                                                                                                                                                                                                                                                                                                                                                                                                                                                                                                                                                                                                                                                                                                                                                                                                                                                                                                                                                 |
| Stomach Adenocarcinoma              | stad                    | Gastrointestinal  | 175,982                   | 443                       | 149,786                                              | 25,26,27, <a href="https://tcga-data.nci.nih.gov/tcgafiles/ftp_auth/distro_ftpusers/anonymous/tumor/stad/gsc/broad.mit.edu/illumina_gnaseq_curated/mutations/broad.mit.edu_STAD.IlluminaGA_DNASeq_curated.Level_2.1.3.0/QCv5_blacklist_Pass.aggregated.capture.tcga.uuid.curated.somatic.maf">https://tcga-data.nci.nih.gov/tcgafiles/ftp_auth/distro_ftpusers/anonymous/tumor/stad/gsc/broad.mit.edu/illumina_gnaseq_curated/mutations/broad.mit.edu_STAD.IlluminaGA_DNASeq_curated.Level_2.1.3.0/QCv5_blacklist_Pass.aggregated.capture.tcga.uuid.curated.somatic.maf</a>                                                                                                                                                                                                                                                                                                                                                                                                                                                                                                                                                                                                                                                                                                                                                                                        |
| Esophageal Carcinoma                | esca                    | Gastrointestinal  | 31,853                    | 234                       | 30,807                                               | 28,29                                                                                                                                                                                                                                                                                                                                                                                                                                                                                                                                                                                                                                                                                                                                                                                                                                                                                                                                                                                                                                                                                                                                                                                                                                                                                                                                                              |

|                                                                  |      |               |         |     |         |                                                                                                                                                                                                                                                                                                                                                                                                                                                                                                                                                                                                                                         |
|------------------------------------------------------------------|------|---------------|---------|-----|---------|-----------------------------------------------------------------------------------------------------------------------------------------------------------------------------------------------------------------------------------------------------------------------------------------------------------------------------------------------------------------------------------------------------------------------------------------------------------------------------------------------------------------------------------------------------------------------------------------------------------------------------------------|
| Adrenocortical Carcinoma                                         | acc  | Genitourinary | 22,102  | 92  | 12,890  | <a href="https://tcga-data.nci.nih.gov/tcgafiles/ftp_auth/distro_ftpusers/anonymous/tumor/acc/gsc/broad.mit.edu/illumina_ga_dnaseq_curated/mutations/broad.mit.edu_ACC.IlluminaGA_DNASeq_curated.Level_2.1.0.0/An_TCGA_ACC_External_capture_All_Pairs.aggregated.capture.tcga.uuid.curated.somatic.maf">https://tcga-data.nci.nih.gov/tcgafiles/ftp_auth/distro_ftpusers/anonymous/tumor/acc/gsc/broad.mit.edu/illumina_ga_dnaseq_curated/mutations/broad.mit.edu_ACC.IlluminaGA_DNASeq_curated.Level_2.1.0.0/An_TCGA_ACC_External_capture_All_Pairs.aggregated.capture.tcga.uuid.curated.somatic.maf</a>                               |
| Bladder Cancer                                                   | blca | Genitourinary | 53,453  | 240 | 50,560  | <a href="https://tcga-data.nci.nih.gov/tcgafiles/ftp_auth/distro_ftpusers/anonymous/tumor/blca/gsc/broad.mit.edu/illumina_ga_dnaseq_curated/mutations/broad.mit.edu_BLCA.IlluminaGA_DNASeq_curated.Level_2.1.4.0/BLCA130_somatic_updated.aggregate.capture.tcga.uuid.curated.somatic.maf">https://tcga-data.nci.nih.gov/tcgafiles/ftp_auth/distro_ftpusers/anonymous/tumor/blca/gsc/broad.mit.edu/illumina_ga_dnaseq_curated/mutations/broad.mit.edu_BLCA.IlluminaGA_DNASeq_curated.Level_2.1.4.0/BLCA130_somatic_updated.aggregate.capture.tcga.uuid.curated.somatic.maf</a>                                                           |
| Kidney Chromophobe Cancer                                        | kich | Genitourinary | 7,559   | 66  | 5,794   | <a href="https://tcga-data.nci.nih.gov/tcgafiles/ftp_auth/distro_ftpusers/anonymous/tumor/kich/gsc/hgsc.bcm.edu/mixed_dnaseq_curated/mutations/hgsc.bcm.edu_KICH.Mixed_DNASeq_curated.Level_2.1.1.0/hgsc.bcm.edu_KICH.IlluminaGA_DNASeq.1.somatic.maf">https://tcga-data.nci.nih.gov/tcgafiles/ftp_auth/distro_ftpusers/anonymous/tumor/kich/gsc/hgsc.bcm.edu/mixed_dnaseq_curated/mutations/hgsc.bcm.edu_KICH.Mixed_DNASeq_curated.Level_2.1.1.0/hgsc.bcm.edu_KICH.IlluminaGA_DNASeq.1.somatic.maf</a>                                                                                                                                 |
| Kidney Renal Clear Cell Carcinoma                                | kirc | Genitourinary | 27,377  | 441 | 22,059  | <a href="https://tcga-data.nci.nih.gov/tcgafiles/ftp_auth/distro_ftpusers/anonymous/tumor/kirc/gsc/hgsc.bcm.edu/mixed_dnaseq/mutations/hgsc.bcm.edu_KIRC.Mixed_DNASeq.Level_2.1.2.0/hgsc.bcm.edu_KIRC.Mixed_DNASeq.1.somatic.maf">https://tcga-data.nci.nih.gov/tcgafiles/ftp_auth/distro_ftpusers/anonymous/tumor/kirc/gsc/hgsc.bcm.edu/mixed_dnaseq/mutations/hgsc.bcm.edu_KIRC.Mixed_DNASeq.Level_2.1.2.0/hgsc.bcm.edu_KIRC.Mixed_DNASeq.1.somatic.maf</a>                                                                                                                                                                           |
| Kidney Renal Papillary Cell Carcinoma                            | kirp | Genitourinary | 34,739  | 169 | 30,527  | <a href="https://tcga-data.nci.nih.gov/tcgafiles/ftp_auth/distro_ftpusers/anonymous/tumor/kirp/gsc/hgsc.bcm.edu/mixed_dnaseq_curated/mutations/hgsc.bcm.edu_KIRP.Mixed_DNASeq_curated.Level_2.1.3.0/hgsc.bcm.edu_KIRP.IlluminaGA_DNASeq.1.somatic.maf">https://tcga-data.nci.nih.gov/tcgafiles/ftp_auth/distro_ftpusers/anonymous/tumor/kirp/gsc/hgsc.bcm.edu/mixed_dnaseq_curated/mutations/hgsc.bcm.edu_KIRP.Mixed_DNASeq_curated.Level_2.1.3.0/hgsc.bcm.edu_KIRP.IlluminaGA_DNASeq.1.somatic.maf</a>                                                                                                                                 |
| Rhabdoid Cancer                                                  | mrt  | Genitourinary | 282     | 33  | 269     | <a href="https://tcga-data.nci.nih.gov/tcgafiles/ftp_auth/distro_ftpusers/anonymous/tumor/prad/gsc/broad.mit.edu/illumina_ga_dnaseq_curated/mutations/broad.mit.edu_PRAD.IlluminaGA_DNASeq_curated.Level_2.1.4.0/PR_TCGA_PRAD_PAIR_Capture_All_Pairs_QCPASS_v4.aggregated.capture.tcga.uuid.curated.somatic.maf">https://tcga-data.nci.nih.gov/tcgafiles/ftp_auth/distro_ftpusers/anonymous/tumor/prad/gsc/broad.mit.edu/illumina_ga_dnaseq_curated/mutations/broad.mit.edu_PRAD.IlluminaGA_DNASeq_curated.Level_2.1.4.0/PR_TCGA_PRAD_PAIR_Capture_All_Pairs_QCPASS_v4.aggregated.capture.tcga.uuid.curated.somatic.maf</a>             |
| Prostate Adenocarcinoma                                          | prad | Genitourinary | 27,985  | 473 | 23,745  | <a href="https://tcga-data.nci.nih.gov/tcgafiles/ftp_auth/distro_ftpusers/anonymous/tumor/prad/gsc/broad.mit.edu/illumina_ga_dnaseq_curated/mutations/broad.mit.edu_PRAD.IlluminaGA_DNASeq_curated.Level_2.1.4.0/PR_TCGA_PRAD_PAIR_Capture_All_Pairs_QCPASS_v4.aggregated.capture.tcga.uuid.curated.somatic.maf">https://tcga-data.nci.nih.gov/tcgafiles/ftp_auth/distro_ftpusers/anonymous/tumor/prad/gsc/broad.mit.edu/illumina_ga_dnaseq_curated/mutations/broad.mit.edu_PRAD.IlluminaGA_DNASeq_curated.Level_2.1.4.0/PR_TCGA_PRAD_PAIR_Capture_All_Pairs_QCPASS_v4.aggregated.capture.tcga.uuid.curated.somatic.maf</a>             |
| Cervical Squamous Cell Carcinoma And Endocervical Adenocarcinoma | cesc | Gynecologic   | 45,894  | 194 | 37,569  | <a href="https://tcga-data.nci.nih.gov/tcgafiles/ftp_auth/distro_ftpusers/anonymous/tumor/cesc/gsc/genome.wustl.edu/illumina_ga_dnaseq_curated/mutations/genome.wustl.edu_CESC.IlluminaGA_DNASeq_curated.Level_2.1.0.0/genome.wustl.edu_CESC.IlluminaGA_DNASeq_curated.Level_2.1.0.0.somatic.maf">https://tcga-data.nci.nih.gov/tcgafiles/ftp_auth/distro_ftpusers/anonymous/tumor/cesc/gsc/genome.wustl.edu/illumina_ga_dnaseq_curated/mutations/genome.wustl.edu_CESC.IlluminaGA_DNASeq_curated.Level_2.1.0.0/genome.wustl.edu_CESC.IlluminaGA_DNASeq_curated.Level_2.1.0.0.somatic.maf</a>                                           |
| Ovarian Serous Cystadenocarcinoma                                | ov   | Gynecologic   | 29,396  | 467 | 26,726  | 42,43                                                                                                                                                                                                                                                                                                                                                                                                                                                                                                                                                                                                                                   |
| Uterine Corpus Endometrial Carcinoma                             | ucec | Gynecologic   | 184,861 | 248 | 169,613 | <a href="https://tcga-data.nci.nih.gov/tcgafiles/ftp_auth/distro_ftpusers/anonymous/tumor/ucec/gsc/genome.wustl.edu/illumina_ga_dnaseq/mutations/genome.wustl.edu_UCEC.IlluminaGA_DNASeq.Level_2.1.7.0/genome.wustl.edu_UCEC.IlluminaGA_DNASeq.Level_2.1.7.somatic.maf">https://tcga-data.nci.nih.gov/tcgafiles/ftp_auth/distro_ftpusers/anonymous/tumor/ucec/gsc/genome.wustl.edu/illumina_ga_dnaseq/mutations/genome.wustl.edu_UCEC.IlluminaGA_DNASeq.Level_2.1.7.0/genome.wustl.edu_UCEC.IlluminaGA_DNASeq.Level_2.1.7.somatic.maf</a>                                                                                               |
| Uterine Carcinosarcoma                                           | ucs  | Gynecologic   | 11,339  | 57  | 9,298   | <a href="https://tcga-data.nci.nih.gov/tcgafiles/ftp_auth/distro_ftpusers/anonymous/tumor/ucs/gsc/broad.mit.edu/illumina_ga_dnaseq_curated/mutations/broad.mit.edu_UCS.IlluminaGA_DNASeq_curated.Level_2.1.0.0/AN_TCGA_UCS_PAIR_Capture_56.aggregated.capture.tcga.uuid.curated.somatic.maf">https://tcga-data.nci.nih.gov/tcgafiles/ftp_auth/distro_ftpusers/anonymous/tumor/ucs/gsc/broad.mit.edu/illumina_ga_dnaseq_curated/mutations/broad.mit.edu_UCS.IlluminaGA_DNASeq_curated.Level_2.1.0.0/AN_TCGA_UCS_PAIR_Capture_56.aggregated.capture.tcga.uuid.curated.somatic.maf</a>                                                     |
| Adenoid Cystic Carcinoma                                         | acyc | HeadAndNeck   | 671     | 59  | 663     | 45                                                                                                                                                                                                                                                                                                                                                                                                                                                                                                                                                                                                                                      |
| Head And Neck Squamous Cell Carcinoma                            | hnsc | HeadAndNeck   | 119,546 | 606 | 106,392 | <a href="https://tcga-data.nci.nih.gov/tcgafiles/ftp_auth/distro_ftpusers/anonymous/tumor/hnsc/gsc/broad.mit.edu/illumina_ga_dnaseq_automated/mutations/broad.mit.edu_HNSC.IlluminaGA_DNASeq_automated.Level_2.1.4.0/PR_TCGA_HNSC_PAIR_Capture_All_Pairs_QCPASS_v4.aggregated.capture.tcga.uuid.automated.somatic.maf">https://tcga-data.nci.nih.gov/tcgafiles/ftp_auth/distro_ftpusers/anonymous/tumor/hnsc/gsc/broad.mit.edu/illumina_ga_dnaseq_automated/mutations/broad.mit.edu_HNSC.IlluminaGA_DNASeq_automated.Level_2.1.4.0/PR_TCGA_HNSC_PAIR_Capture_All_Pairs_QCPASS_v4.aggregated.capture.tcga.uuid.automated.somatic.maf</a> |
| Nasopharyngeal Carcinoma                                         | npc  | HeadAndNeck   | 1,537   | 56  | 1,511   | 48                                                                                                                                                                                                                                                                                                                                                                                                                                                                                                                                                                                                                                      |

|                                     |             |             |         |     |         |                                                                                                                                                                                                                                                                                                                                                                                                                                                                                                                                                                                                                                          |
|-------------------------------------|-------------|-------------|---------|-----|---------|------------------------------------------------------------------------------------------------------------------------------------------------------------------------------------------------------------------------------------------------------------------------------------------------------------------------------------------------------------------------------------------------------------------------------------------------------------------------------------------------------------------------------------------------------------------------------------------------------------------------------------------|
| Thyroid Carcinoma                   | thca        | HeadAndNeck | 7,084   | 405 | 6,452   | 49, <a href="https://tcga-data.nci.nih.gov/tcgafiles/ftp_auth/distro_ftpusers/anonymous/tumor/thca/gsc/broad.mit.edu/illumina_gnaseq/mutations/broad.mit.edu_THCA.IlluminaGA_DNASeq.Level_2.1.5.0/AN_TCGA_THCA_PAIR_Capture_ALLQC_14Aug2013_429.aggregated.capture.tcga.uuid.somatic.maf">https://tcga-data.nci.nih.gov/tcgafiles/ftp_auth/distro_ftpusers/anonymous/tumor/thca/gsc/broad.mit.edu/illumina_gnaseq/mutations/broad.mit.edu_THCA.IlluminaGA_DNASeq.Level_2.1.5.0/AN_TCGA_THCA_PAIR_Capture_ALLQC_14Aug2013_429.aggregated.capture.tcga.uuid.somatic.maf</a>                                                                |
| Hypodiploid Acute Lymphoid Leukemia | all         | Hematologic | 957     | 83  | 936     | 5,50,51,52                                                                                                                                                                                                                                                                                                                                                                                                                                                                                                                                                                                                                               |
| Chronic Lymphocytic Leukemia        | cll         | Hematologic | 4,311   | 284 | 4,107   | 53,54,55                                                                                                                                                                                                                                                                                                                                                                                                                                                                                                                                                                                                                                 |
| Non-Hodgkin Lymphoma                | dlbc, lymbc | Hematologic | 4,670   | 70  | 4,441   | 56,57,58                                                                                                                                                                                                                                                                                                                                                                                                                                                                                                                                                                                                                                 |
| Acute Myeloid Leukemia              | laml        | Hematologic | 2,627   | 210 | 2,072   | 59,60,61, <a href="https://tcga-data.nci.nih.gov/tcgafiles/ftp_auth/distro_ftpusers/anonymous/tumor/laml/gsc/genome.wustl.edu/illumina_gnaseq/mutations/genome.wustl.edu_LAML.IlluminaGA_DNASeq.Level_2.2.16.0/genome.wustl.edu_LAML.IlluminaGA_DNASeq.Level_2.2.13.0.somatic.maf">https://tcga-data.nci.nih.gov/tcgafiles/ftp_auth/distro_ftpusers/anonymous/tumor/laml/gsc/genome.wustl.edu/illumina_gnaseq/mutations/genome.wustl.edu_LAML.IlluminaGA_DNASeq.Level_2.2.16.0/genome.wustl.edu_LAML.IlluminaGA_DNASeq.Level_2.2.13.0.somatic.maf</a>                                                                                    |
| Mantle Cell Lymphoma                | mcl         | Hematologic | 581     | 29  | 295     | 62                                                                                                                                                                                                                                                                                                                                                                                                                                                                                                                                                                                                                                       |
| Myelodysplasia                      | mds         | Hematologic | 230     | 28  | 225     | 63                                                                                                                                                                                                                                                                                                                                                                                                                                                                                                                                                                                                                                       |
| Multiple Myeloma                    | mmyl        | Hematologic | 13,743  | 274 | 13,506  | 5,64                                                                                                                                                                                                                                                                                                                                                                                                                                                                                                                                                                                                                                     |
| Cutaneous Squamous Cell Carcinoma   | csc         | Skin        | 100,689 | 39  | 98,522  | 65                                                                                                                                                                                                                                                                                                                                                                                                                                                                                                                                                                                                                                       |
| Skin Cutaneous Melanoma             | skcm        | Skin        | 390,593 | 571 | 366,063 | 66,67,68,69, <a href="https://tcga-data.nci.nih.gov/tcgafiles/ftp_auth/distro_ftpusers/anonymous/tumor/skcm/gsc/broad.mit.edu/illumina_gnaseq/mutations/broad.mit.edu_SKCM.IlluminaGA_DNASeq.Level_2.1.5.0/skcm_clean_pairs.aggregated.capture.tcga.uuid.somatic.maf">https://tcga-data.nci.nih.gov/tcgafiles/ftp_auth/distro_ftpusers/anonymous/tumor/skcm/gsc/broad.mit.edu/illumina_gnaseq/mutations/broad.mit.edu_SKCM.IlluminaGA_DNASeq.Level_2.1.5.0/skcm_clean_pairs.aggregated.capture.tcga.uuid.somatic.maf</a>                                                                                                                 |
| Lung Adenocarcinoma                 | luad        | Thoracic    | 274,565 | 726 | 244,334 | 71,72, <a href="https://tcga-data.nci.nih.gov/tcgafiles/ftp_auth/distro_ftpusers/anonymous/tumor/luad/gsc/broad.mit.edu/illumina_gnaseq_automated/mutations/broad.mit.edu_LUAD.IlluminaGA_DNASeq_automated.Level_2.1.5.0/PR_TCGA_LUAD_PAIR_Capture_All_Pairs_QCPASS_v4.aggregated.capture.tcga.uuid.automated.somatic.maf">https://tcga-data.nci.nih.gov/tcgafiles/ftp_auth/distro_ftpusers/anonymous/tumor/luad/gsc/broad.mit.edu/illumina_gnaseq_automated/mutations/broad.mit.edu_LUAD.IlluminaGA_DNASeq_automated.Level_2.1.5.0/PR_TCGA_LUAD_PAIR_Capture_All_Pairs_QCPASS_v4.aggregated.capture.tcga.uuid.automated.somatic.maf</a> |
| Lung Squamous Cell Carcinoma        | lusc        | Thoracic    | 65,330  | 179 | 62,458  | 72, <a href="https://tcga-data.nci.nih.gov/tcgafiles/ftp_auth/distro_ftpusers/anonymous/tumor/lusc/gsc/broad.mit.edu/illumina_gnaseq/mutations/broad.mit.edu_LUSC.IlluminaGA_DNASeq.Level_2.1.5.0/LUSC_Paper_v8.aggregated.tcga.somatic.maf">https://tcga-data.nci.nih.gov/tcgafiles/ftp_auth/distro_ftpusers/anonymous/tumor/lusc/gsc/broad.mit.edu/illumina_gnaseq/mutations/broad.mit.edu_LUSC.IlluminaGA_DNASeq.Level_2.1.5.0/LUSC_Paper_v8.aggregated.tcga.somatic.maf</a>                                                                                                                                                          |
| Lung Small Cell Carcinoma           | lusm        | Thoracic    | 12,789  | 57  | 12,538  | 73,74                                                                                                                                                                                                                                                                                                                                                                                                                                                                                                                                                                                                                                    |

† In total, 27 samples had zero mutations after filtering (as described in Methods) and were removed. Total number of samples included in analysis: 11,119

\* See References for Supplementary Table 1 for complete reference

Supplementary Table 2: Summary of statistically significant hotspot mutations

| Hugo Symbol | Codon | Alt Common Codon Usage * | Variant Amino Acid                       | Q-value   | Tumor Count | Tumor Type Count | Validation Level [a] | Tumor Type Composition                                                                                                                                                                                                                                                                                                                                                                                                                                                                                                                                                                                                                                                                                                                                                                                                                                                                                                                                                                                                                                                                                                                                                                                                                                                                                                                                                                                                                                                                                                                                                                                                                                                                                                                                                                                                                                                                                                                                                                                                                                                                                                                                                                                                                                                                                                                                                                                                                                                                                                                                                                                                                                                                                                                                                                                                                                                                                                                                                                                                                                                                                                                                                                                                                                                                                                                                                                                                                                                                                                                                                                                                                                                                                                                                                                                                                                                                                                                                                                                                                                                                                                                                                                                                                                    |
|-------------|-------|--------------------------|------------------------------------------|-----------|-------------|------------------|----------------------|-----------------------------------------------------------------------------------------------------------------------------------------------------------------------------------------------------------------------------------------------------------------------------------------------------------------------------------------------------------------------------------------------------------------------------------------------------------------------------------------------------------------------------------------------------------------------------------------------------------------------------------------------------------------------------------------------------------------------------------------------------------------------------------------------------------------------------------------------------------------------------------------------------------------------------------------------------------------------------------------------------------------------------------------------------------------------------------------------------------------------------------------------------------------------------------------------------------------------------------------------------------------------------------------------------------------------------------------------------------------------------------------------------------------------------------------------------------------------------------------------------------------------------------------------------------------------------------------------------------------------------------------------------------------------------------------------------------------------------------------------------------------------------------------------------------------------------------------------------------------------------------------------------------------------------------------------------------------------------------------------------------------------------------------------------------------------------------------------------------------------------------------------------------------------------------------------------------------------------------------------------------------------------------------------------------------------------------------------------------------------------------------------------------------------------------------------------------------------------------------------------------------------------------------------------------------------------------------------------------------------------------------------------------------------------------------------------------------------------------------------------------------------------------------------------------------------------------------------------------------------------------------------------------------------------------------------------------------------------------------------------------------------------------------------------------------------------------------------------------------------------------------------------------------------------------------------------------------------------------------------------------------------------------------------------------------------------------------------------------------------------------------------------------------------------------------------------------------------------------------------------------------------------------------------------------------------------------------------------------------------------------------------------------------------------------------------------------------------------------------------------------------------------------------------------------------------------------------------------------------------------------------------------------------------------------------------------------------------------------------------------------------------------------------------------------------------------------------------------------------------------------------------------------------------------------------------------------------------------------------------------------|
| BRAF        | V600  | NA                       | E:520 K:33 R:4 V:1                       | 0         | 558         | 10               | Level-3              | skcm:252 thca:237 coadread:44 luad:9 gbm:6 mmyl:5 hgg:2 lgg:1 kirp:1 hns:1<br>paad:290 luad:188 coadread:151 ucec:36 stad:14 mmyl:9 ucs:7 cesc:7 ov:6 brca:6 blca:5 <br>aml:3 esca:3 skcm:2 kirp:2 gbm:2 thca:1 prad:1 npc:1 mbs:1 lihc:1<br>brca:17 l ucec:20 coadread:20 hns:19 stad:15 ucs:5 skcm:3 luad:3 lihc:3 cesc:3 prad:2 pa<br>ad:2 mbt:2 lusc:2 lgg:2 kirc:2 hgg:2 gbm:2 blca:2 ov:1 esca:1 acc:1<br>lgg:243 gbm:20 laml:19 skcm:17 prad:6 lihc:4 mmyl:3 coadread:3 luad:2 hgg:2 mbs:1 mbt:1<br> brca:1 blca:1 acyc:1<br>skcm:127 thca:34 mmyl:27 coadread:16 laml:6 ucec:4 luad:4 cll:4 blca:3 stad:2 ov:2 npc:1 <br>ihc:1 lgg:1 kich:1 gbm:1 acc:1<br>brca:78 coadread:37 hns:31 cesc:26 blca:23 ucec:14 stad:12 lusc:10 luad:9 ucs:5 gbm:5 <br>esca:5 skcm:3 prad:3 lgg:3 kirc:3 hgg:2 gbc:2 paad:1 ov:1 npc:1 lusc:1 lihc:1 kirp:1<br>brca:51 hns:20 ucec:13 coadread:13 cesc:12 blca:10 stad:5 luad:5 esca:4 lusc:3 prad:2 lg<br>g:2 gbm:2 lusc:1 lihc:1 kirp:1<br>lgg:47 coadread:30 ov:25 brca:20 stad:19 hns:19 luad:16 esca:14 paad:12 ucec:9 gbm:7 <br>lusc:6 ucs:4 prad:4 hgg:4 lusc:3 lihc:3 cll:3 blca:3 skcm:1 mmyl:1 mbt:1 laml:1 acc:1<br>coadread:34 hns:22 ov:19 gbm:13 esca:13 stad:11 paad:11 blca:11 luad:10 lgg:10 ucec:9 <br>brca:9 ucs:7 csc:7 skcm:5 prad:5 lihc:5 hgg:5 lusc:4 mmyl:1 mbs:1 mbt:1 lusc:1 laml:1 cll:<br>1<br>coadread:38 luad:17 ucec:10 stad:10 mmyl:9 paad:2 cll:2 cesc:2 lihc:1 laml:1<br>paad:24 mmyl:15 coadread:11 luad:7 ucec:3 thca:3 stad:3 blca:3 skcm:2 lusc:1 lihc:1 laml:<br>1 cll:1<br>thca:14 blca:8 hns:6 skcm:3 csc:3 prad:2 lusc:2 luad:1 brca:1<br>brca:14 cll:13 paad:3 mbs:1 mbt:1 laml:1 kirc:1<br>lihc:24 ucec:12 mbt:6 prad:4 skcm:2 cesc:2 stad:1 blca:1<br>lihc:19 ucec:16 mbt:8 luad:3 stad:1 skcm:1 prad:1 paad:1 esca:1 coadread:1 blca:1<br>brca:13 ucec:11 coadread:6 lgg:3 stad:2 prad:2 hns:2 blca:2 ucs:1 skcm:1 mbt:1 gbm:1 ce<br>sc:1<br>coadread:23 stad:10 ucs:7 ucec:7 cesc:4 hns:2 brca:2 ov:1 mbt:1 lusc:1 luad:1 esca:1 cll:<br>1 acyc:1<br>brca:21 ucec:5 stad:5 coadread:3 ucs:2 prad:2 luad:1 hns:1 gbm:1 acyc:1<br>ucec:20 lihc:11 luad:7 stad:3 mbt:3 esca:2 blca:2 prad:1 cesc:1<br>luad:15 laml:7 paad:5 ucs:2 ucec:2 cesc:2 blca:2 mbs:1 hns:1<br>ucec:56 gbm:7 brca:7 coadread:7 ucs:3 cesc:3 skcm:2 lusc:2 hns:2 stad:1 prad:1 lusc:1 k<br>irc:1<br>coadread:36 brca:18 ov:16 hns:16 esca:12 stad:11 paad:9 gbm:7 lgg:4 blca:4 prad:3 lusc:<br>3 luad:3 ucs:2 ucec:2 hgg:2 skcm:1 npc:1 mbt:1 lihc:1 gbc:1 cll:1<br>ov:13 brca:11 lgg:8 hns:7 lihc:5 paad:4 gbm:4 ucec:3 luad:3 stad:2 lusc:2 coadread:2 ucs:<br>1 skcm:1 prad:1 lusc:1 kirp:1 kich:1 blca:1<br>hns:13 brca:9 lgg:7 ov:6 paad:5 lusc:5 ucs:3 stad:3 luad:3 lihc:3 gbm:3 esca:3 csc:2 ucec<br>:1 skcm:1 lusc:1 laml:1 gbc:1 coadread:1<br>brca:13 hns:9 ov:8 luad:5 lusc:4 lihc:4 lgg:4 ucs:3 esca:3 ucec:2 paad:2 stad:1 prad:1 lusc:<br>m:1 laml:1 kirp:1 hgg:1 coadread:1 cll:1 blca:1<br>luad:30<br>lihc:11 coadread:6 ucec:5 skcm:5 prad:3 paad:1 luad:1 acc:1<br>hgg:26 pias:1<br>coadread:15 skcm:7 laml:6 mmyl:3 ucec:2 mbs:2 stad:1<br>paad:10 coadread:9 stad:4 luad:4 lihc:3 brca:2 skcm:1 hns:1 cesc:1 acc:1<br>skcm:26 hns:3 ucec:1 csc:1<br>brca:30 luad:3 coadread:3 thca:2 stad:2 prad:2 cesc:2 skcm:1 lusc:1 lihc:1 hns:1 blca:1<br>gbm:24 lgg:3 hns:1<br>coadread:8 hns:7 ucec:6 blca:4 ucs:3 lusc:3 cesc:3 skcm:2 stad:1 ov:1 esca:1 cll:1<br>ucec:10 lihc:8 mbt:4 luad:3 acc:3 stad:2 skcm:2 hns:1<br>coadread:34 stad:2 ucec:1<br>ov:10 hns:6 coadread:6 brca:6 stad:5 esca:5 paad:4 luad:4 lgg:4 lusc:2 prad:1 lihc:1 laml:<br>1 kich:1 blca:1<br>hns:14 ov:13 coadread:12 luad:11 paad:8 stad:6 esca:6 prad:5 brca:5 lusc:4 lgg:4 gbm:3 li<br>hc:2 blca:2 ucs:1 hgg:1<br>hns:24 skcm:8 esca:6 paad:5 luad:2 stad:1 prad:1 lusc:1 kirp:1 coadread:1 blca:1<br>blca:7 stad:5 cesc:4 brca:3 ov:2 csc:2 luad:1 hns:1 coadread:1<br>laml:29 mbs:1 luad:1<br>lihc:10 acc:6 skcm:4 ucec:3 coadread:2 prad:1 luad:1 blca:1<br>coadread:20 paad:8 stad:5 esca:3 cesc:2 luad:1 hns:1 brca:1<br>prad:22<br>ov:11 brca:7 hns:4 coadread:4 lihc:3 lgg:3 mmyl:2 gbm:2 esca:2 ucs:1 stad:1 paad:1 lusc:<br>1 luad:1 laml:1 cll:1<br>lgg:12 laml:3 lihc:2 hgg:1 coadread:1 |
| KRAS        | G12   | NA                       | D:255 V:227 C:115 R:71 A:43 S:23 G:1 F:1 | 0         | 736         | 21               | Level-3              |                                                                                                                                                                                                                                                                                                                                                                                                                                                                                                                                                                                                                                                                                                                                                                                                                                                                                                                                                                                                                                                                                                                                                                                                                                                                                                                                                                                                                                                                                                                                                                                                                                                                                                                                                                                                                                                                                                                                                                                                                                                                                                                                                                                                                                                                                                                                                                                                                                                                                                                                                                                                                                                                                                                                                                                                                                                                                                                                                                                                                                                                                                                                                                                                                                                                                                                                                                                                                                                                                                                                                                                                                                                                                                                                                                                                                                                                                                                                                                                                                                                                                                                                                                                                                                                           |
| PIK3CA      | H1047 | NA                       | R:236 L:37 Y:6 Q:4                       | 0         | 283         | 22               | Level-3              |                                                                                                                                                                                                                                                                                                                                                                                                                                                                                                                                                                                                                                                                                                                                                                                                                                                                                                                                                                                                                                                                                                                                                                                                                                                                                                                                                                                                                                                                                                                                                                                                                                                                                                                                                                                                                                                                                                                                                                                                                                                                                                                                                                                                                                                                                                                                                                                                                                                                                                                                                                                                                                                                                                                                                                                                                                                                                                                                                                                                                                                                                                                                                                                                                                                                                                                                                                                                                                                                                                                                                                                                                                                                                                                                                                                                                                                                                                                                                                                                                                                                                                                                                                                                                                                           |
| IDH1        | R132  | NA                       | H:250 C:50 G:12 S:8 L:4                  | 0         | 324         | 15               | Level-3              |                                                                                                                                                                                                                                                                                                                                                                                                                                                                                                                                                                                                                                                                                                                                                                                                                                                                                                                                                                                                                                                                                                                                                                                                                                                                                                                                                                                                                                                                                                                                                                                                                                                                                                                                                                                                                                                                                                                                                                                                                                                                                                                                                                                                                                                                                                                                                                                                                                                                                                                                                                                                                                                                                                                                                                                                                                                                                                                                                                                                                                                                                                                                                                                                                                                                                                                                                                                                                                                                                                                                                                                                                                                                                                                                                                                                                                                                                                                                                                                                                                                                                                                                                                                                                                                           |
| NRAS        | Q61   | NA                       | R:114 K:76 L:27 H:17 P:1                 | 0         | 235         | 17               | Level-3              |                                                                                                                                                                                                                                                                                                                                                                                                                                                                                                                                                                                                                                                                                                                                                                                                                                                                                                                                                                                                                                                                                                                                                                                                                                                                                                                                                                                                                                                                                                                                                                                                                                                                                                                                                                                                                                                                                                                                                                                                                                                                                                                                                                                                                                                                                                                                                                                                                                                                                                                                                                                                                                                                                                                                                                                                                                                                                                                                                                                                                                                                                                                                                                                                                                                                                                                                                                                                                                                                                                                                                                                                                                                                                                                                                                                                                                                                                                                                                                                                                                                                                                                                                                                                                                                           |
| PIK3CA      | E545  | NA                       | K:251 A:9 G:8 Q:6 D:3                    | 0         | 277         | 24               | Level-3              |                                                                                                                                                                                                                                                                                                                                                                                                                                                                                                                                                                                                                                                                                                                                                                                                                                                                                                                                                                                                                                                                                                                                                                                                                                                                                                                                                                                                                                                                                                                                                                                                                                                                                                                                                                                                                                                                                                                                                                                                                                                                                                                                                                                                                                                                                                                                                                                                                                                                                                                                                                                                                                                                                                                                                                                                                                                                                                                                                                                                                                                                                                                                                                                                                                                                                                                                                                                                                                                                                                                                                                                                                                                                                                                                                                                                                                                                                                                                                                                                                                                                                                                                                                                                                                                           |
| PIK3CA      | E542  | NA                       | K:134 A:4 Q:3 V:2 G:2                    | 1.07E-215 | 145         | 16               | Level-3              |                                                                                                                                                                                                                                                                                                                                                                                                                                                                                                                                                                                                                                                                                                                                                                                                                                                                                                                                                                                                                                                                                                                                                                                                                                                                                                                                                                                                                                                                                                                                                                                                                                                                                                                                                                                                                                                                                                                                                                                                                                                                                                                                                                                                                                                                                                                                                                                                                                                                                                                                                                                                                                                                                                                                                                                                                                                                                                                                                                                                                                                                                                                                                                                                                                                                                                                                                                                                                                                                                                                                                                                                                                                                                                                                                                                                                                                                                                                                                                                                                                                                                                                                                                                                                                                           |
| TP53        | R273  | NA                       | C:119 H:103 L:22 S:5 P:4                 | 9.66E-139 | 253         | 24               | Level-3              |                                                                                                                                                                                                                                                                                                                                                                                                                                                                                                                                                                                                                                                                                                                                                                                                                                                                                                                                                                                                                                                                                                                                                                                                                                                                                                                                                                                                                                                                                                                                                                                                                                                                                                                                                                                                                                                                                                                                                                                                                                                                                                                                                                                                                                                                                                                                                                                                                                                                                                                                                                                                                                                                                                                                                                                                                                                                                                                                                                                                                                                                                                                                                                                                                                                                                                                                                                                                                                                                                                                                                                                                                                                                                                                                                                                                                                                                                                                                                                                                                                                                                                                                                                                                                                                           |
| TP53        | R248  | NA                       | Q:108 W:90 L:11 P:5 G:2                  | 7.57E-120 | 216         | 25               | Level-3              |                                                                                                                                                                                                                                                                                                                                                                                                                                                                                                                                                                                                                                                                                                                                                                                                                                                                                                                                                                                                                                                                                                                                                                                                                                                                                                                                                                                                                                                                                                                                                                                                                                                                                                                                                                                                                                                                                                                                                                                                                                                                                                                                                                                                                                                                                                                                                                                                                                                                                                                                                                                                                                                                                                                                                                                                                                                                                                                                                                                                                                                                                                                                                                                                                                                                                                                                                                                                                                                                                                                                                                                                                                                                                                                                                                                                                                                                                                                                                                                                                                                                                                                                                                                                                                                           |
| KRAS        | G13   | NA                       | D:75 C:12 V:2 R:1 G:1 A:1                | 3.74E-119 | 92          | 10               | Level-3              |                                                                                                                                                                                                                                                                                                                                                                                                                                                                                                                                                                                                                                                                                                                                                                                                                                                                                                                                                                                                                                                                                                                                                                                                                                                                                                                                                                                                                                                                                                                                                                                                                                                                                                                                                                                                                                                                                                                                                                                                                                                                                                                                                                                                                                                                                                                                                                                                                                                                                                                                                                                                                                                                                                                                                                                                                                                                                                                                                                                                                                                                                                                                                                                                                                                                                                                                                                                                                                                                                                                                                                                                                                                                                                                                                                                                                                                                                                                                                                                                                                                                                                                                                                                                                                                           |
| KRAS        | Q61   | NA                       | H:44 R:11 K:10 L:8 P:1 E:1               | 1.23E-105 | 75          | 13               | Level-3              |                                                                                                                                                                                                                                                                                                                                                                                                                                                                                                                                                                                                                                                                                                                                                                                                                                                                                                                                                                                                                                                                                                                                                                                                                                                                                                                                                                                                                                                                                                                                                                                                                                                                                                                                                                                                                                                                                                                                                                                                                                                                                                                                                                                                                                                                                                                                                                                                                                                                                                                                                                                                                                                                                                                                                                                                                                                                                                                                                                                                                                                                                                                                                                                                                                                                                                                                                                                                                                                                                                                                                                                                                                                                                                                                                                                                                                                                                                                                                                                                                                                                                                                                                                                                                                                           |
| HRAS        | Q61   | NA                       | R:19 K:10 L:9 H:2                        | 4.77E-76  | 40          | 9                | Level-3              |                                                                                                                                                                                                                                                                                                                                                                                                                                                                                                                                                                                                                                                                                                                                                                                                                                                                                                                                                                                                                                                                                                                                                                                                                                                                                                                                                                                                                                                                                                                                                                                                                                                                                                                                                                                                                                                                                                                                                                                                                                                                                                                                                                                                                                                                                                                                                                                                                                                                                                                                                                                                                                                                                                                                                                                                                                                                                                                                                                                                                                                                                                                                                                                                                                                                                                                                                                                                                                                                                                                                                                                                                                                                                                                                                                                                                                                                                                                                                                                                                                                                                                                                                                                                                                                           |
| SF3B1       | K700  | NA                       | E:33 R:1                                 | 7.71E-75  | 34          | 7                | Level-3              |                                                                                                                                                                                                                                                                                                                                                                                                                                                                                                                                                                                                                                                                                                                                                                                                                                                                                                                                                                                                                                                                                                                                                                                                                                                                                                                                                                                                                                                                                                                                                                                                                                                                                                                                                                                                                                                                                                                                                                                                                                                                                                                                                                                                                                                                                                                                                                                                                                                                                                                                                                                                                                                                                                                                                                                                                                                                                                                                                                                                                                                                                                                                                                                                                                                                                                                                                                                                                                                                                                                                                                                                                                                                                                                                                                                                                                                                                                                                                                                                                                                                                                                                                                                                                                                           |
| CTNNB1      | D32   | NA                       | Y:15 G:13 N:10 V:8 H:4 A:2               | 4.29E-74  | 52          | 8                | Level-3              |                                                                                                                                                                                                                                                                                                                                                                                                                                                                                                                                                                                                                                                                                                                                                                                                                                                                                                                                                                                                                                                                                                                                                                                                                                                                                                                                                                                                                                                                                                                                                                                                                                                                                                                                                                                                                                                                                                                                                                                                                                                                                                                                                                                                                                                                                                                                                                                                                                                                                                                                                                                                                                                                                                                                                                                                                                                                                                                                                                                                                                                                                                                                                                                                                                                                                                                                                                                                                                                                                                                                                                                                                                                                                                                                                                                                                                                                                                                                                                                                                                                                                                                                                                                                                                                           |
| CTNNB1      | S33   | NA                       | C:16 F:13 P:12 Y:8 A:3 T:1               | 3.57E-72  | 53          | 11               | Level-3              |                                                                                                                                                                                                                                                                                                                                                                                                                                                                                                                                                                                                                                                                                                                                                                                                                                                                                                                                                                                                                                                                                                                                                                                                                                                                                                                                                                                                                                                                                                                                                                                                                                                                                                                                                                                                                                                                                                                                                                                                                                                                                                                                                                                                                                                                                                                                                                                                                                                                                                                                                                                                                                                                                                                                                                                                                                                                                                                                                                                                                                                                                                                                                                                                                                                                                                                                                                                                                                                                                                                                                                                                                                                                                                                                                                                                                                                                                                                                                                                                                                                                                                                                                                                                                                                           |
| PIK3CA      | Q546  | NA                       | R:20 K:15 P:7 E:2 L:1 H:1                | 1.58E-71  | 46          | 13               | Level-3              |                                                                                                                                                                                                                                                                                                                                                                                                                                                                                                                                                                                                                                                                                                                                                                                                                                                                                                                                                                                                                                                                                                                                                                                                                                                                                                                                                                                                                                                                                                                                                                                                                                                                                                                                                                                                                                                                                                                                                                                                                                                                                                                                                                                                                                                                                                                                                                                                                                                                                                                                                                                                                                                                                                                                                                                                                                                                                                                                                                                                                                                                                                                                                                                                                                                                                                                                                                                                                                                                                                                                                                                                                                                                                                                                                                                                                                                                                                                                                                                                                                                                                                                                                                                                                                                           |
| FBXW7       | R465  | NA                       | C:33 H:26 P:1 L:1 G:1                    | 4.83E-70  | 62          | 14               | Level-3              |                                                                                                                                                                                                                                                                                                                                                                                                                                                                                                                                                                                                                                                                                                                                                                                                                                                                                                                                                                                                                                                                                                                                                                                                                                                                                                                                                                                                                                                                                                                                                                                                                                                                                                                                                                                                                                                                                                                                                                                                                                                                                                                                                                                                                                                                                                                                                                                                                                                                                                                                                                                                                                                                                                                                                                                                                                                                                                                                                                                                                                                                                                                                                                                                                                                                                                                                                                                                                                                                                                                                                                                                                                                                                                                                                                                                                                                                                                                                                                                                                                                                                                                                                                                                                                                           |
| PIK3CA      | N345  | NA                       | K:36 I:3 T:2 H:1                         | 3.47E-66  | 42          | 10               | Level-3              |                                                                                                                                                                                                                                                                                                                                                                                                                                                                                                                                                                                                                                                                                                                                                                                                                                                                                                                                                                                                                                                                                                                                                                                                                                                                                                                                                                                                                                                                                                                                                                                                                                                                                                                                                                                                                                                                                                                                                                                                                                                                                                                                                                                                                                                                                                                                                                                                                                                                                                                                                                                                                                                                                                                                                                                                                                                                                                                                                                                                                                                                                                                                                                                                                                                                                                                                                                                                                                                                                                                                                                                                                                                                                                                                                                                                                                                                                                                                                                                                                                                                                                                                                                                                                                                           |
| CTNNB1      | S37   | NA                       | F:21 C:16 A:6 P:4 Y:3                    | 1.09E-64  | 50          | 9                | Level-3              |                                                                                                                                                                                                                                                                                                                                                                                                                                                                                                                                                                                                                                                                                                                                                                                                                                                                                                                                                                                                                                                                                                                                                                                                                                                                                                                                                                                                                                                                                                                                                                                                                                                                                                                                                                                                                                                                                                                                                                                                                                                                                                                                                                                                                                                                                                                                                                                                                                                                                                                                                                                                                                                                                                                                                                                                                                                                                                                                                                                                                                                                                                                                                                                                                                                                                                                                                                                                                                                                                                                                                                                                                                                                                                                                                                                                                                                                                                                                                                                                                                                                                                                                                                                                                                                           |
| U2AF1       | S34   | NA                       | F:34 Y:3                                 | 1.24E-61  | 37          | 9                | Level-3              |                                                                                                                                                                                                                                                                                                                                                                                                                                                                                                                                                                                                                                                                                                                                                                                                                                                                                                                                                                                                                                                                                                                                                                                                                                                                                                                                                                                                                                                                                                                                                                                                                                                                                                                                                                                                                                                                                                                                                                                                                                                                                                                                                                                                                                                                                                                                                                                                                                                                                                                                                                                                                                                                                                                                                                                                                                                                                                                                                                                                                                                                                                                                                                                                                                                                                                                                                                                                                                                                                                                                                                                                                                                                                                                                                                                                                                                                                                                                                                                                                                                                                                                                                                                                                                                           |
| PTEN        | R130  | NA                       | Q:40 G:28 *16 L:5 P:4                    | 5.33E-59  | 93          | 13               | Level-3              |                                                                                                                                                                                                                                                                                                                                                                                                                                                                                                                                                                                                                                                                                                                                                                                                                                                                                                                                                                                                                                                                                                                                                                                                                                                                                                                                                                                                                                                                                                                                                                                                                                                                                                                                                                                                                                                                                                                                                                                                                                                                                                                                                                                                                                                                                                                                                                                                                                                                                                                                                                                                                                                                                                                                                                                                                                                                                                                                                                                                                                                                                                                                                                                                                                                                                                                                                                                                                                                                                                                                                                                                                                                                                                                                                                                                                                                                                                                                                                                                                                                                                                                                                                                                                                                           |
| TP53        | R175  | NA                       | H:143 G:7 C:4                            | 2.24E-58  | 154         | 22               | Level-3              |                                                                                                                                                                                                                                                                                                                                                                                                                                                                                                                                                                                                                                                                                                                                                                                                                                                                                                                                                                                                                                                                                                                                                                                                                                                                                                                                                                                                                                                                                                                                                                                                                                                                                                                                                                                                                                                                                                                                                                                                                                                                                                                                                                                                                                                                                                                                                                                                                                                                                                                                                                                                                                                                                                                                                                                                                                                                                                                                                                                                                                                                                                                                                                                                                                                                                                                                                                                                                                                                                                                                                                                                                                                                                                                                                                                                                                                                                                                                                                                                                                                                                                                                                                                                                                                           |
| TP53        | Y220  | NA                       | C:63 S:4 H:2 N:1 D:1                     | 3.38E-58  | 71          | 19               | Level-3              |                                                                                                                                                                                                                                                                                                                                                                                                                                                                                                                                                                                                                                                                                                                                                                                                                                                                                                                                                                                                                                                                                                                                                                                                                                                                                                                                                                                                                                                                                                                                                                                                                                                                                                                                                                                                                                                                                                                                                                                                                                                                                                                                                                                                                                                                                                                                                                                                                                                                                                                                                                                                                                                                                                                                                                                                                                                                                                                                                                                                                                                                                                                                                                                                                                                                                                                                                                                                                                                                                                                                                                                                                                                                                                                                                                                                                                                                                                                                                                                                                                                                                                                                                                                                                                                           |
| TP53        | H179  | NA                       | R:37 Y:16 Q:7 L:5 N:3 D:2 P:1            | 2.81E-56  | 71          | 19               | Level-3              |                                                                                                                                                                                                                                                                                                                                                                                                                                                                                                                                                                                                                                                                                                                                                                                                                                                                                                                                                                                                                                                                                                                                                                                                                                                                                                                                                                                                                                                                                                                                                                                                                                                                                                                                                                                                                                                                                                                                                                                                                                                                                                                                                                                                                                                                                                                                                                                                                                                                                                                                                                                                                                                                                                                                                                                                                                                                                                                                                                                                                                                                                                                                                                                                                                                                                                                                                                                                                                                                                                                                                                                                                                                                                                                                                                                                                                                                                                                                                                                                                                                                                                                                                                                                                                                           |
| TP53        | H193  | NA                       | R:32 Y:13 L:11 P:7 D:2 N:1               | 1.37E-55  | 66          | 20               | Level-3              |                                                                                                                                                                                                                                                                                                                                                                                                                                                                                                                                                                                                                                                                                                                                                                                                                                                                                                                                                                                                                                                                                                                                                                                                                                                                                                                                                                                                                                                                                                                                                                                                                                                                                                                                                                                                                                                                                                                                                                                                                                                                                                                                                                                                                                                                                                                                                                                                                                                                                                                                                                                                                                                                                                                                                                                                                                                                                                                                                                                                                                                                                                                                                                                                                                                                                                                                                                                                                                                                                                                                                                                                                                                                                                                                                                                                                                                                                                                                                                                                                                                                                                                                                                                                                                                           |
| EGFR        | L858  | NA                       | R:30                                     | 1.96E-54  | 30          | 1                | Level-3              |                                                                                                                                                                                                                                                                                                                                                                                                                                                                                                                                                                                                                                                                                                                                                                                                                                                                                                                                                                                                                                                                                                                                                                                                                                                                                                                                                                                                                                                                                                                                                                                                                                                                                                                                                                                                                                                                                                                                                                                                                                                                                                                                                                                                                                                                                                                                                                                                                                                                                                                                                                                                                                                                                                                                                                                                                                                                                                                                                                                                                                                                                                                                                                                                                                                                                                                                                                                                                                                                                                                                                                                                                                                                                                                                                                                                                                                                                                                                                                                                                                                                                                                                                                                                                                                           |
| CTNNB1      | T41   | NA                       | A:21 I:10 N:2                            | 1.39E-51  | 33          | 8                | Level-3              |                                                                                                                                                                                                                                                                                                                                                                                                                                                                                                                                                                                                                                                                                                                                                                                                                                                                                                                                                                                                                                                                                                                                                                                                                                                                                                                                                                                                                                                                                                                                                                                                                                                                                                                                                                                                                                                                                                                                                                                                                                                                                                                                                                                                                                                                                                                                                                                                                                                                                                                                                                                                                                                                                                                                                                                                                                                                                                                                                                                                                                                                                                                                                                                                                                                                                                                                                                                                                                                                                                                                                                                                                                                                                                                                                                                                                                                                                                                                                                                                                                                                                                                                                                                                                                                           |
| H3F3A       | K28   | K27                      | M:27                                     | 2.24E-50  | 27          | 2                | Level-3              |                                                                                                                                                                                                                                                                                                                                                                                                                                                                                                                                                                                                                                                                                                                                                                                                                                                                                                                                                                                                                                                                                                                                                                                                                                                                                                                                                                                                                                                                                                                                                                                                                                                                                                                                                                                                                                                                                                                                                                                                                                                                                                                                                                                                                                                                                                                                                                                                                                                                                                                                                                                                                                                                                                                                                                                                                                                                                                                                                                                                                                                                                                                                                                                                                                                                                                                                                                                                                                                                                                                                                                                                                                                                                                                                                                                                                                                                                                                                                                                                                                                                                                                                                                                                                                                           |
| NRAS        | G12   | NA                       | D:18 C:7 V:3 S:3 A:3 R:2                 | 1.61E-48  | 36          | 7                | Level-3              |                                                                                                                                                                                                                                                                                                                                                                                                                                                                                                                                                                                                                                                                                                                                                                                                                                                                                                                                                                                                                                                                                                                                                                                                                                                                                                                                                                                                                                                                                                                                                                                                                                                                                                                                                                                                                                                                                                                                                                                                                                                                                                                                                                                                                                                                                                                                                                                                                                                                                                                                                                                                                                                                                                                                                                                                                                                                                                                                                                                                                                                                                                                                                                                                                                                                                                                                                                                                                                                                                                                                                                                                                                                                                                                                                                                                                                                                                                                                                                                                                                                                                                                                                                                                                                                           |
| GNAS        | R844  | R201                     | C:19 H:16 L:1                            | 6.69E-45  | 36          | 10               | Level-3              |                                                                                                                                                                                                                                                                                                                                                                                                                                                                                                                                                                                                                                                                                                                                                                                                                                                                                                                                                                                                                                                                                                                                                                                                                                                                                                                                                                                                                                                                                                                                                                                                                                                                                                                                                                                                                                                                                                                                                                                                                                                                                                                                                                                                                                                                                                                                                                                                                                                                                                                                                                                                                                                                                                                                                                                                                                                                                                                                                                                                                                                                                                                                                                                                                                                                                                                                                                                                                                                                                                                                                                                                                                                                                                                                                                                                                                                                                                                                                                                                                                                                                                                                                                                                                                                           |
| RAC1        | P29   | NA                       | S:25 L:5 T:1                             | 1.92E-44  | 31          | 4                | Level-3              |                                                                                                                                                                                                                                                                                                                                                                                                                                                                                                                                                                                                                                                                                                                                                                                                                                                                                                                                                                                                                                                                                                                                                                                                                                                                                                                                                                                                                                                                                                                                                                                                                                                                                                                                                                                                                                                                                                                                                                                                                                                                                                                                                                                                                                                                                                                                                                                                                                                                                                                                                                                                                                                                                                                                                                                                                                                                                                                                                                                                                                                                                                                                                                                                                                                                                                                                                                                                                                                                                                                                                                                                                                                                                                                                                                                                                                                                                                                                                                                                                                                                                                                                                                                                                                                           |
| AKT1        | E17   | NA                       | K:49                                     | 2.66E-41  | 49          | 12               | Level-3              |                                                                                                                                                                                                                                                                                                                                                                                                                                                                                                                                                                                                                                                                                                                                                                                                                                                                                                                                                                                                                                                                                                                                                                                                                                                                                                                                                                                                                                                                                                                                                                                                                                                                                                                                                                                                                                                                                                                                                                                                                                                                                                                                                                                                                                                                                                                                                                                                                                                                                                                                                                                                                                                                                                                                                                                                                                                                                                                                                                                                                                                                                                                                                                                                                                                                                                                                                                                                                                                                                                                                                                                                                                                                                                                                                                                                                                                                                                                                                                                                                                                                                                                                                                                                                                                           |
| EGFR        | A289  | NA                       | V:17 T:6 D:3 N:1 I:1                     | 7.33E-41  | 28          | 3                | Level-3              |                                                                                                                                                                                                                                                                                                                                                                                                                                                                                                                                                                                                                                                                                                                                                                                                                                                                                                                                                                                                                                                                                                                                                                                                                                                                                                                                                                                                                                                                                                                                                                                                                                                                                                                                                                                                                                                                                                                                                                                                                                                                                                                                                                                                                                                                                                                                                                                                                                                                                                                                                                                                                                                                                                                                                                                                                                                                                                                                                                                                                                                                                                                                                                                                                                                                                                                                                                                                                                                                                                                                                                                                                                                                                                                                                                                                                                                                                                                                                                                                                                                                                                                                                                                                                                                           |
| FBXW7       | R505  | NA                       | G:19 C:16 L:2 H:2 S:1                    | 3.86E-40  | 40          | 12               | Level-3              |                                                                                                                                                                                                                                                                                                                                                                                                                                                                                                                                                                                                                                                                                                                                                                                                                                                                                                                                                                                                                                                                                                                                                                                                                                                                                                                                                                                                                                                                                                                                                                                                                                                                                                                                                                                                                                                                                                                                                                                                                                                                                                                                                                                                                                                                                                                                                                                                                                                                                                                                                                                                                                                                                                                                                                                                                                                                                                                                                                                                                                                                                                                                                                                                                                                                                                                                                                                                                                                                                                                                                                                                                                                                                                                                                                                                                                                                                                                                                                                                                                                                                                                                                                                                                                                           |
| CTNNB1      | G34   | NA                       | R:16 V:8 E:7 A:1 *1                      | 2.08E-39  | 33          | 8                | Level-3              |                                                                                                                                                                                                                                                                                                                                                                                                                                                                                                                                                                                                                                                                                                                                                                                                                                                                                                                                                                                                                                                                                                                                                                                                                                                                                                                                                                                                                                                                                                                                                                                                                                                                                                                                                                                                                                                                                                                                                                                                                                                                                                                                                                                                                                                                                                                                                                                                                                                                                                                                                                                                                                                                                                                                                                                                                                                                                                                                                                                                                                                                                                                                                                                                                                                                                                                                                                                                                                                                                                                                                                                                                                                                                                                                                                                                                                                                                                                                                                                                                                                                                                                                                                                                                                                           |
| APC         | R1450 | NA                       | *:37                                     | 5.96E-39  | 37          | 3                | Level-3              |                                                                                                                                                                                                                                                                                                                                                                                                                                                                                                                                                                                                                                                                                                                                                                                                                                                                                                                                                                                                                                                                                                                                                                                                                                                                                                                                                                                                                                                                                                                                                                                                                                                                                                                                                                                                                                                                                                                                                                                                                                                                                                                                                                                                                                                                                                                                                                                                                                                                                                                                                                                                                                                                                                                                                                                                                                                                                                                                                                                                                                                                                                                                                                                                                                                                                                                                                                                                                                                                                                                                                                                                                                                                                                                                                                                                                                                                                                                                                                                                                                                                                                                                                                                                                                                           |
| TP53        | C176  | NA                       | F:26 Y:21 S:3 G:2 *2 W:1 R:1 C:1         | 8.54E-38  | 57          | 15               | Level-3              |                                                                                                                                                                                                                                                                                                                                                                                                                                                                                                                                                                                                                                                                                                                                                                                                                                                                                                                                                                                                                                                                                                                                                                                                                                                                                                                                                                                                                                                                                                                                                                                                                                                                                                                                                                                                                                                                                                                                                                                                                                                                                                                                                                                                                                                                                                                                                                                                                                                                                                                                                                                                                                                                                                                                                                                                                                                                                                                                                                                                                                                                                                                                                                                                                                                                                                                                                                                                                                                                                                                                                                                                                                                                                                                                                                                                                                                                                                                                                                                                                                                                                                                                                                                                                                                           |
| TP53        | G245  | NA                       | S:46 D:22 V:16 C:9 R:2 A:2               | 1.16E-37  | 97          | 16               | Level-3              |                                                                                                                                                                                                                                                                                                                                                                                                                                                                                                                                                                                                                                                                                                                                                                                                                                                                                                                                                                                                                                                                                                                                                                                                                                                                                                                                                                                                                                                                                                                                                                                                                                                                                                                                                                                                                                                                                                                                                                                                                                                                                                                                                                                                                                                                                                                                                                                                                                                                                                                                                                                                                                                                                                                                                                                                                                                                                                                                                                                                                                                                                                                                                                                                                                                                                                                                                                                                                                                                                                                                                                                                                                                                                                                                                                                                                                                                                                                                                                                                                                                                                                                                                                                                                                                           |
| CDKN2A      | R80   | NA                       | *:50 Q:1                                 | 3.73E-34  | 51          | 11               | Level-3              |                                                                                                                                                                                                                                                                                                                                                                                                                                                                                                                                                                                                                                                                                                                                                                                                                                                                                                                                                                                                                                                                                                                                                                                                                                                                                                                                                                                                                                                                                                                                                                                                                                                                                                                                                                                                                                                                                                                                                                                                                                                                                                                                                                                                                                                                                                                                                                                                                                                                                                                                                                                                                                                                                                                                                                                                                                                                                                                                                                                                                                                                                                                                                                                                                                                                                                                                                                                                                                                                                                                                                                                                                                                                                                                                                                                                                                                                                                                                                                                                                                                                                                                                                                                                                                                           |
| ERBB2       | S310  | NA                       | F:25 Y:1                                 | 4.27E-34  | 26          | 9                | Level-3              |                                                                                                                                                                                                                                                                                                                                                                                                                                                                                                                                                                                                                                                                                                                                                                                                                                                                                                                                                                                                                                                                                                                                                                                                                                                                                                                                                                                                                                                                                                                                                                                                                                                                                                                                                                                                                                                                                                                                                                                                                                                                                                                                                                                                                                                                                                                                                                                                                                                                                                                                                                                                                                                                                                                                                                                                                                                                                                                                                                                                                                                                                                                                                                                                                                                                                                                                                                                                                                                                                                                                                                                                                                                                                                                                                                                                                                                                                                                                                                                                                                                                                                                                                                                                                                                           |
| DNMT3A      | R882  | NA                       | H:22 C:8 P:1                             | 3.44E-33  | 31          | 3                | Level-3              |                                                                                                                                                                                                                                                                                                                                                                                                                                                                                                                                                                                                                                                                                                                                                                                                                                                                                                                                                                                                                                                                                                                                                                                                                                                                                                                                                                                                                                                                                                                                                                                                                                                                                                                                                                                                                                                                                                                                                                                                                                                                                                                                                                                                                                                                                                                                                                                                                                                                                                                                                                                                                                                                                                                                                                                                                                                                                                                                                                                                                                                                                                                                                                                                                                                                                                                                                                                                                                                                                                                                                                                                                                                                                                                                                                                                                                                                                                                                                                                                                                                                                                                                                                                                                                                           |
| CTNNB1      | S45   | NA                       | F:11 P:10 Y:3 C:3 S:1                    | 1.25E-31  | 28          | 8                | Level-3              |                                                                                                                                                                                                                                                                                                                                                                                                                                                                                                                                                                                                                                                                                                                                                                                                                                                                                                                                                                                                                                                                                                                                                                                                                                                                                                                                                                                                                                                                                                                                                                                                                                                                                                                                                                                                                                                                                                                                                                                                                                                                                                                                                                                                                                                                                                                                                                                                                                                                                                                                                                                                                                                                                                                                                                                                                                                                                                                                                                                                                                                                                                                                                                                                                                                                                                                                                                                                                                                                                                                                                                                                                                                                                                                                                                                                                                                                                                                                                                                                                                                                                                                                                                                                                                                           |
| SMAD4       | R361  | NA                       | H:20 C:18 G:2 P:1                        | 6.93E-31  | 41          | 8                | Level-3              |                                                                                                                                                                                                                                                                                                                                                                                                                                                                                                                                                                                                                                                                                                                                                                                                                                                                                                                                                                                                                                                                                                                                                                                                                                                                                                                                                                                                                                                                                                                                                                                                                                                                                                                                                                                                                                                                                                                                                                                                                                                                                                                                                                                                                                                                                                                                                                                                                                                                                                                                                                                                                                                                                                                                                                                                                                                                                                                                                                                                                                                                                                                                                                                                                                                                                                                                                                                                                                                                                                                                                                                                                                                                                                                                                                                                                                                                                                                                                                                                                                                                                                                                                                                                                                                           |
| SPOP        | F133  | NA                       | L:9 V:4 C:4 S:3 I:2                      | 2.16E-30  | 22          | 1                | Level-3              |                                                                                                                                                                                                                                                                                                                                                                                                                                                                                                                                                                                                                                                                                                                                                                                                                                                                                                                                                                                                                                                                                                                                                                                                                                                                                                                                                                                                                                                                                                                                                                                                                                                                                                                                                                                                                                                                                                                                                                                                                                                                                                                                                                                                                                                                                                                                                                                                                                                                                                                                                                                                                                                                                                                                                                                                                                                                                                                                                                                                                                                                                                                                                                                                                                                                                                                                                                                                                                                                                                                                                                                                                                                                                                                                                                                                                                                                                                                                                                                                                                                                                                                                                                                                                                                           |
| TP53        | I195  | NA                       | T:25 F:11 N:5 S:2 M:2                    | 4.79E-30  | 45          | 16               | Level-3              |                                                                                                                                                                                                                                                                                                                                                                                                                                                                                                                                                                                                                                                                                                                                                                                                                                                                                                                                                                                                                                                                                                                                                                                                                                                                                                                                                                                                                                                                                                                                                                                                                                                                                                                                                                                                                                                                                                                                                                                                                                                                                                                                                                                                                                                                                                                                                                                                                                                                                                                                                                                                                                                                                                                                                                                                                                                                                                                                                                                                                                                                                                                                                                                                                                                                                                                                                                                                                                                                                                                                                                                                                                                                                                                                                                                                                                                                                                                                                                                                                                                                                                                                                                                                                                                           |
| IDH2        | R172  | NA                       | K:12 S:3 W:2 M:1 G:1                     | 8.43E-30  | 19          | 5                | Level-3              |                                                                                                                                                                                                                                                                                                                                                                                                                                                                                                                                                                                                                                                                                                                                                                                                                                                                                                                                                                                                                                                                                                                                                                                                                                                                                                                                                                                                                                                                                                                                                                                                                                                                                                                                                                                                                                                                                                                                                                                                                                                                                                                                                                                                                                                                                                                                                                                                                                                                                                                                                                                                                                                                                                                                                                                                                                                                                                                                                                                                                                                                                                                                                                                                                                                                                                                                                                                                                                                                                                                                                                                                                                                                                                                                                                                                                                                                                                                                                                                                                                                                                                                                                                                                                                                           |

|          |             |      |                              |          |    |    |         |                                                                                                                              |
|----------|-------------|------|------------------------------|----------|----|----|---------|------------------------------------------------------------------------------------------------------------------------------|
| HRAS     | G13         | NA   | R:11 V:9 D:2 C:2 S:1 I:1     | 3.19E-29 | 26 | 7  | Level-3 | hnsc:13 blca:4 skcm:3 usc:3 lud:1 csc:1 brca:1                                                                               |
| HRAS     | G12         | NA   | S:10 D:8 C:3 A:2 V:1 N:1     | 8.34E-28 | 25 | 4  | Level-3 | hnsc:16 blca:6 csc:2 acyc:1                                                                                                  |
| PIK3CA   | M1043       | NA   | V:13 I:11 T:2 L:2            | 9.83E-28 | 28 | 11 | Level-3 | ucec:6 brca:6 lgg:3 hnsc:3 gbm:3 coadread:2 thca:1 stad:1 paad:1 blca:1 acyc:1                                               |
| MYD88    | L273        | L265 | P:15                         | 1.93E-26 | 15 | 3  | Level-3 | cl:12 dlbc:2 mmyl:1                                                                                                          |
| ERBB3    | V104        | NA   | M:19 L:7                     | 1.23E-25 | 26 | 8  | Level-3 | stad:8 coadread:6 cesc:4 blca:3 gbc:2 ucs:1 ucec:1 brca:1                                                                    |
| NRAS     | G13         | NA   | D:11 R:10 V:1                | 1.84E-25 | 22 | 9  | Level-3 | mmyl:5 laml:5 skcm:3 coadread:3 mds:2 stad:1 mb:1 dlbc:1 blca:1                                                              |
| PIK3CA   | G118        | NA   | D:24                         | 2.89E-25 | 24 | 11 | Level-3 | ucec:6 brca:5 lgg:4 stad:2 thca:1 prad:1 paad:1 usc:1 hnsc:1 gbm:1 cesc:1                                                    |
| BRAF     | G469        | NA   | A:9 V:6 R:4 E:2 S:1 *:1      | 3.47E-25 | 23 | 8  | Level-3 | lud:9 skcm:5 mmyl:3 prad:2 usc:1 csc:1 coadread:1 blca:1                                                                     |
| BRAF     | K601        | NA   | E:12 N:2 T:1                 | 1.12E-24 | 15 | 7  | Level-3 | skcm:6 lud:3 stad:2 ucec:1 thca:1 prad:1 cl:1                                                                                |
| KRAS     | A146        | NA   | T:24 V:3 P:1                 | 1.19E-24 | 28 | 6  | Level-3 | coadread:19 mmyl:4 stad:2 lud:1 laml:1 cesc:1                                                                                |
| ERBB2    | L755        | NA   | S:9 M:3 W:1 P:1              | 1.74E-24 | 14 | 7  | Level-3 | brca:7 coadread:2 ucec:1 stad:1 skcm:1 kirp:1 blca:1                                                                         |
| IDH2     | R140        | NA   | Q:19 W:1 L:1                 | 3.70E-24 | 21 | 5  | Level-3 | laml:17 mmyl:1 mds:1 hnsc:1 coadread:1                                                                                       |
| APC      | R876        | NA   | *:26 Q:1                     | 4.54E-24 | 27 | 2  | Level-3 | coadread:26 ucec:1                                                                                                           |
| TP53     | Y126_splice | NA   |                              | 9.39E-24 | 41 | 16 | Level-2 | ov:7 paad:5 lud:5 stad:4 brca:4 gbm:3 skcm:2 prad:2 lhc:2 usc:1 mmyl:1 lum:1 usc:1 laml:1 hnsc:1 coadread:1                  |
| TP53     | R249        | NA   | S:25 M:9 G:6 W:5 T:2 K:1     | 4.92E-23 | 48 | 15 | Level-3 | lud:12 lhc:10 lum:4 hnsc:4 prad:3 usc:3 ucec:2 paad:2 gbm:2 usc:1 stad:1 ov:1 mb:1 esca:1 csc:1                              |
| TP53     | R282        | NA   | W:83 G:4 Q:2 R:1 P:1         | 9.90E-23 | 91 | 19 | Level-3 | coadread:21 hnsc:14 stad:9 paad:9 esca:7 ov:6 gbm:5 lgg:4 usc:3 lud:3 skcm:2 ucec:1 prad:1 lymbc:1 lhc:1 kich:1 csc:1 brca:1 |
| B2M      | M1          | NA   | I:6 V:5 L:4 T:2 R:1          | 3.91E-22 | 18 | 10 | Level-2 | skcm:3 lud:3 stad:2 ov:2 lum:2 hnsc:2 mmyl:1 usc:1 dlbc:1 coadread:1                                                         |
| PIK3CA   | C420        | NA   | R:17 G:1                     | 5.69E-22 | 18 | 7  | Level-3 | brca:5 ucec:4 coadread:4 stad:2 prad:1 usc:1 acyc:1                                                                          |
| TP53     | Y163        | NA   | C:27 N:4 H:4 D:2 *:1         | 1.85E-21 | 38 | 14 | Level-3 | hnsc:8 ov:7 lud:5 brca:4 usc:3 lhc:2 esca:2 usc:1 skcm:1 paad:1 lum:1 lgg:1 hgg:1 coadread:1                                 |
| STK19    | D89         | NA   | N:16 D:2                     | 3.48E-21 | 18 | 2  | Level-3 | skcm:13 csc:5                                                                                                                |
| POLE     | P286        | NA   | R:14 S:1 H:1                 | 4.08E-21 | 16 | 5  | Level-3 | ucec:8 coadread:5 usc:1 paad:1 brca:1                                                                                        |
| FGFR3    | S249        | NA   | C:18                         | 1.07E-20 | 18 | 4  | Level-3 | blca:11 hnsc:4 usc:2 kirp:1                                                                                                  |
| CDKN2A   | W110        | NA   | *:26                         | 1.17E-20 | 26 | 8  | Level-3 | hnsc:12 skcm:4 paad:2 usc:2 gbm:2 csc:2 ucec:1 esca:1                                                                        |
| FGFR2    | N550        | N549 | K:11 H:2                     | 1.85E-20 | 13 | 4  | Level-3 | ucec:6 brca:5 npc:1 lud:1                                                                                                    |
| SLC27A5  | T554        | NA   | I:8 T:6                      | 5.90E-20 | 14 | 3  | Level-1 | skcm:12 hnsc:1 csc:1                                                                                                         |
| EZH2     | Y646        | Y641 | N:6 F:4 S:2 H:2              | 6.39E-20 | 14 | 2  | Level-3 | skcm:7 dlbc:7                                                                                                                |
| SMTNL2   | E244_splice | NA   |                              | 2.26E-19 | 12 | 2  | Level-1 | ucec:7 brca:5                                                                                                                |
| NFE2L2   | E79         | NA   | Q:9 K:6 V:2 *:2 D:1          | 2.31E-19 | 20 | 6  | Level-3 | hnsc:7 usc:4 blca:3 lud:2 lhc:2 cesc:2                                                                                       |
| RIMS2    | S423        | S201 | S:15                         | 2.97E-18 | 15 | 3  | Level-1 | stad:1 esca:3 brca:1                                                                                                         |
| NFE2L2   | D29         | NA   | H:11 Y:4 N:2 G:2             | 3.26E-18 | 19 | 7  | Level-3 | hnsc:6 usc:5 cesc:3 lud:2 ucec:1 kir:1 blca:1                                                                                |
| PIK3CA   | K111        | NA   | E:12 N:8 R:1                 | 2.61E-17 | 21 | 11 | Level-3 | ucec:4 coadread:4 brca:3 stad:2 hnsc:2 nbl:1 mmyl:1 lud:1 lgg:1 gbm:1 cesc:1                                                 |
| TP53     | C238        | NA   | Y:15 F:12 S:3 R:3 G:1        | 2.81E-17 | 34 | 17 | Level-3 | ov:4 gbm:4 brca:4 hnsc:3 coadread:3 usc:2 ucec:2 paad:2 esca:2 stad:1 mmyl:1 lud:1 lhc:1 lgg:1 cl:1 cesc:1 blca:1            |
| PIK3CA   | R88         | NA   | Q:40                         | 5.17E-17 | 40 | 10 | Level-3 | coadread:16 ucec:11 stad:4 gbm:2 brca:2 usc:1 prad:1 hnsc:1 hgg:1 blca:1                                                     |
| PIK3CA   | E726        | NA   | K:22 A:2                     | 6.73E-17 | 24 | 8  | Level-2 | brca:9 coadread:4 cesc:3 usc:2 hnsc:2 blca:2 lud:1 hqq:1                                                                     |
| EGFR     | G598        | NA   | V:17 A:2                     | 5.03E-16 | 19 | 3  | Level-3 | gbm:15 lgg:3 hgg:1                                                                                                           |
| RQCD1    | P131        | NA   | L:13 S:1                     | 5.53E-16 | 14 | 1  | Level-3 | skcm:14                                                                                                                      |
| FLT3     | D835        | NA   | Y:11 E:3 H:2 V:1             | 7.51E-16 | 17 | 1  | Level-3 | laml:17                                                                                                                      |
| CDKN2A   | H83         | NA   | Y:12 R:3 D:3 Q:1             | 9.29E-16 | 19 | 8  | Level-3 | paad:5 skcm:4 hnsc:3 stad:2 lud:2 lhc:1 csc:1 blca:1                                                                         |
| BRAF     | N581        | NA   | S:7 T:2 I:1 H:1              | 1.11E-15 | 11 | 6  | Level-3 | skcm:4 lud:3 ov:1 mmyl:1 kirp:1 coadread:1                                                                                   |
| TP53     | V173        | NA   | L:15 M:12 G:2 A:2 E:1        | 1.82E-15 | 32 | 15 | Level-3 | hnsc:7 brca:4 lud:3 lgg:3 stad:2 paad:2 ov:2 coadread:2 ucec:1 skcm:1 lum:1 lhc:1 hgg:1 esca:1 acc:1                         |
| TP53     | C275        | NA   | Y:15 F:10 S:4 *:2 R:1        | 1.87E-15 | 32 | 16 | Level-3 | ov:4 lud:4 hnsc:3 esca:3 coadread:3 skcm:2 lhc:2 lgg:2 gbm:2 paad:1 mmyl:1 kich:1 cl:1 brca:1 blca:1 acc:1                   |
| BRAF     | G466        | NA   | V:10 E:6 A:1                 | 2.31E-15 | 17 | 6  | Level-3 | lud:7 mmyl:4 skcm:3 usc:1 hnsc:1 coadread:1                                                                                  |
| TP53     | Y205        | NA   | C:19 F:3 S:2 N:2 H:2 D:2 *:1 | 6.95E-15 | 31 | 16 | Level-3 | lud:5 lhc:4 coadread:4 paad:2 ov:2 hnsc:2 esca:2 brca:2 usc:1 ucec:1 mmyl:1 lymbc:1 usc:1 lgg:1 kich:1 gbm:1                 |
| RRAS2    | Q72         | NA   | L:7 H:2                      | 8.00E-15 | 9  | 6  | Level-1 | ucec:3 lud:2 usc:1 prad:1 usc:1 hnsc:1                                                                                       |
| TP53     | Y234        | NA   | C:23 S:2 H:2 *:2 N:1 D:1     | 1.35E-14 | 31 | 14 | Level-3 | ov:5 brca:5 usc:3 hnsc:3 gbm:3 stad:2 lhc:2 esca:2 prad:1 paad:1 lum:1 coadread:1 blca:1 acc:1                               |
| APC      | R1114       | NA   | *:24                         | 1.48E-14 | 24 | 3  | Level-3 | coadread:22 ucec:1 stad:1                                                                                                    |
| APC      | R213        | NA   | *:20                         | 1.49E-14 | 20 | 2  | Level-3 | coadread:19 thca:1                                                                                                           |
| PPP2R1A  | R183        | NA   | W:14 Q:4 G:1                 | 3.71E-14 | 19 | 9  | Level-2 | coadread:5 usc:3 ov:3 ucec:2 lud:2 stad:1 prad:1 hnsc:1 brca:1                                                               |
| NFE2L2   | E82         | NA   | D:7 A:2 Q:1 G:1              | 1.60E-13 | 11 | 7  | Level-1 | lhc:3 ucec:2 lud:2 kirp:1 kir:1 cesc:1 blca:1                                                                                |
| RXRA     | S427        | NA   | F:11 Y:3                     | 2.18E-13 | 14 | 3  | Level-2 | blca:12 paad:1 lhc:1                                                                                                         |
| MTOR     | S2215       | NA   | Y:8 F:5 T:1                  | 3.24E-13 | 14 | 7  | Level-3 | coadread:4 ucec:3 skcm:2 cesc:2 kirp:1 kir:1 gbm:1                                                                           |
| HIST1H3B | K28         | NA   | M:11 E:1                     | 3.41E-13 | 12 | 2  | Level-2 | hgg:11 hnsc:1                                                                                                                |
| APC      | Q1378       | NA   | *:15                         | 6.08E-13 | 15 | 1  | Level-3 | coadread:15                                                                                                                  |
| CDKN2A   | R58         | NA   | *:27 R:1                     | 8.48E-13 | 28 | 8  | Level-3 | hnsc:14 skcm:4 paad:4 lud:2 usc:1 kirp:1 esca:1 csc:1                                                                        |
| PPP2R1A  | P179        | NA   | R:12 L:1                     | 1.56E-12 | 13 | 2  | Level-3 | ucec:8 usc:5                                                                                                                 |
| CREBBP   | R1446       | NA   | C:9 L:3 H:3 G:1              | 1.67E-12 | 16 | 11 | Level-3 | hnsc:3 mb:2 lhc:2 blca:2 stad:1 skcm:1 usc:1 gbm:1 coadread:1 cesc:1 acyc:1                                                  |
| POLE     | V411        | NA   | L:10                         | 1.76E-12 | 10 | 4  | Level-3 | ucec:5 coadread:3 stad:1 gbm:1                                                                                               |
| EP300    | D1399       | NA   | N:16 Y:2                     | 5.93E-12 | 18 | 6  | Level-3 | hnsc:6 cesc:5 usc:2 esca:2 blca:2 mb:1                                                                                       |
| BRAF     | D594        | NA   | G:6 N:5 H:1                  | 6.61E-12 | 12 | 9  | Level-3 | lud:3 mmyl:2 skcm:1 lgg:1 hnsc:1 coadread:1 cl:1 blca:1 acc:1                                                                |
| RHOA     | Y42         | NA   | C:7 S:2 I:1 F:1              | 1.26E-11 | 11 | 3  | Level-2 | stad:9 lymbc:1 hnsc:1                                                                                                        |
| FBXW7    | R479        | NA   | Q:13 *:4 P:2 L:2 G:2 R:1     | 1.53E-11 | 24 | 12 | Level-3 | coadread:4 usc:3 stad:3 hnsc:3 cesc:3 usc:2 ucec:1 skcm:1 kirp:1 gbm:1 brca:1 blca:1                                         |

|        |             |      |                              |          |     |    |         |                                                                                                                                                                |
|--------|-------------|------|------------------------------|----------|-----|----|---------|----------------------------------------------------------------------------------------------------------------------------------------------------------------|
| MAP2K1 | P124        | NA   | S:11 L:2 Q:1 P:1             | 2.05E-11 | 15  | 4  | Level-3 | skcm:12 ucec:1 coadread:1 blca:1                                                                                                                               |
| MAP2K1 | K57         | NA   | N:7 T:3                      | 2.98E-11 | 10  | 6  | Level-3 | luad:4 skcm:2 stad:1 prad:1 hncs:1 dlbc:1                                                                                                                      |
| TP53   | C135        | NA   | Y:9 F:9 R:3 W:2 S:2 * G:1    | 4.65E-11 | 28  | 13 | Level-3 | esca:5 brca:5 coadread:3 stad:2 prad:2 paad:2 ov:2 luad:2 lusc:1 lihc:1 gg:1 blca:1 acc:1                                                                      |
| PIK3CA | E453        | NA   | K:16 Q:3 D:1                 | 6.40E-11 | 20  | 10 | Level-3 | brca:8 gg:3 stad:2 ucec:1 lusc:1 luad:1 lihc:1 hncs:1 gbm:1 blca:1                                                                                             |
| CDKN2A | V51_splice  | NA   |                              | 1.11E-10 | 15  | 5  | Level-3 | skcm:5 hncs:4 lihc:3 luad:2 blca:1                                                                                                                             |
| NOTCH2 | R5          | NA   | R:10                         | 1.19E-10 | 10  | 3  | Level-1 | acc:8 ov:1 kirc:1                                                                                                                                              |
| ERBB2  | V842        | NA   | I:14                         | 1.31E-10 | 14  | 7  | Level-3 | coadread:4 stad:3 ucec:2 paad:2 ucs:1 gbc:1 brca:1                                                                                                             |
| DCAF13 | T118        | NA   | T:8                          | 1.56E-10 | 8   | 4  | Level-1 | stad:3 esca:3 kich:1 brca:1                                                                                                                                    |
| NUP93  | E14         | NA   | K:10 G:1                     | 1.59E-10 | 11  | 6  | Level-1 | brca:6 thca:1 luad:1 lihc:1 hncs:1 blca:1                                                                                                                      |
| NFE2L2 | T80         | NA   | K:3 R:2 P:2 A:2              | 1.96E-10 | 9   | 7  | Level-1 | ucec:3 lusc:1 luad:1 lihc:1 kirc:1 hncs:1 esca:1                                                                                                               |
| FGFR3  | Y375        | Y373 | C:8                          | 2.78E-10 | 8   | 2  | Level-3 | blca:7 kirc:1                                                                                                                                                  |
| ATM    | R337        | NA   | C:13 H:5                     | 5.19E-10 | 18  | 8  | Level-2 | coadread:7 stad:2 skcm:2 paad:2 luad:2 hncs:1 brca:1 blca:1                                                                                                    |
| KNSTRN | S24         | NA   | F:13                         | 7.71E-10 | 13  | 2  | Level-3 | skcm:11 cscs:2                                                                                                                                                 |
| NFE2L2 | G81         | NA   | V:3 S:3 D:2 C:2              | 1.34E-09 | 10  | 7  | Level-1 | lusc:3 lihc:2 ucec:1 kirc:1 kirc:1 hncs:1 brca:1                                                                                                               |
| CTNNB1 | K335        | NA   | I:8 T:1                      | 1.60E-09 | 9   | 1  | Level-3 | lihc:9                                                                                                                                                         |
| TP53   | M237        | NA   | I:17 K:4 V:3                 | 1.88E-09 | 24  | 12 | Level-3 | ov:4 luad:3 gg:3 hncs:3 esca:3 stad:2 ucec:1 paad:1 lusc:1 hgg:1 coadread:1 brca:1                                                                             |
| GPRIN2 | A50         | NA   | A:11                         | 2.54E-09 | 11  | 3  | Level-1 | coadread:8 lihc:2 brca:1                                                                                                                                       |
| SOS1   | N233        | NA   | Y:7                          | 2.80E-09 | 7   | 2  | Level-3 | luad:4 ucec:3                                                                                                                                                  |
| SMAD4  | G386        | NA   | D:5 V:3 S:1 C:1 A:1          | 3.31E-09 | 11  | 6  | Level-2 | esca:3 coadread:3 stad:2 prad:1 paad:1 luad:1                                                                                                                  |
| PTEN   | R233        | NA   | *:27 Q:1                     | 3.67E-09 | 28  | 8  | Level-3 | ucec:14 gbm:5 stad:3 coadread:2 ucs:1 prad:1 cscs:1 blca:1                                                                                                     |
| MAPK1  | E322        | NA   | K:15 *:1                     | 4.00E-09 | 16  | 3  | Level-3 | hncs:8 cscs:7 blca:1                                                                                                                                           |
| INPPL1 | A1185       | NA   | D:8                          | 5.91E-09 | 8   | 5  | Level-1 | acc:4 prad:1 lihc:1 hncs:1 blca:1                                                                                                                              |
| TP53   | R196        | NA   | *:61 P:6                     | 6.92E-09 | 67  | 16 | Level-3 | hncs:13 brca:10 coadread:7 paad:6 esca:6 skcm:4 gbm:4 stad:3 ov:3 luad:3 gg:3 mmyl:1 lusc:1 kirc:1 cscs:1                                                      |
| TP53   | G266        | NA   | V:16 E:14 R:12 *:4           | 7.47E-09 | 46  | 18 | Level-3 | hncs:7 ov:5 paad:4 coadread:4 luad:3 gg:3 brca:3 skcm:2 lihc:2 gbm:2 esca:2 cscs:2 cli:2 ucs:1 ucec:1 lusc:1 lusc:1 blca:1                                     |
| TP53   | C242        | NA   | F:13 S:5 Y:3 W:1 G:1 C:1     | 8.62E-09 | 24  | 11 | Level-3 | hncs:5 luad:4 lusc:3 lihc:3 stad:2 cli:2 ucs:1 gbm:1 esca:1 brca:1 blca:1                                                                                      |
| ERBB3  | D297        | NA   | Y:9 V:1 N:1                  | 9.18E-09 | 11  | 5  | Level-2 | ucec:3 stad:3 brca:2 blca:2 ucs:1                                                                                                                              |
| CDKN2A | Q50         | NA   | *:12 H:2 R:1 Q:1             | 9.77E-09 | 16  | 7  | Level-3 | skcm:6 paad:3 cscs:3 stad:1 lusc:1 hncs:1 coadread:1                                                                                                           |
| MYCN   | P44         | NA   | L:9                          | 1.09E-08 | 9   | 5  | Level-2 | nbl:4 ucec:2 paad:1 mbi:1 gbm:1                                                                                                                                |
| POM121 | N94         | N359 | S:7                          | 1.23E-08 | 7   | 4  | Level-1 | paad:4 skcm:1 prad:1 gbm:1                                                                                                                                     |
| TP53   | R213        | NA   | *:86 Q:8 L:7 P:1 G:1         | 1.29E-08 | 103 | 23 | Level-3 | coadread:16 hncs:14 esca:9 brca:9 skcm:8 stad:6 luad:5 paad:4 ov:4 luad:4 lihc:4 ucec:3 kich:3 gg:2 gbm:2 cscs:2 blca:2 ucs:1 prad:1 npc:1 kirc:1 acyc:1 acc:1 |
| TP53   | Y236        | NA   | C:16 *:3 N:2 D:2             | 2.01E-08 | 23  | 11 | Level-3 | hncs:6 luad:3 gg:3 paad:2 ov:2 coadread:2 stad:1 prad:1 lusc:1 cscs:1 brca:1                                                                                   |
| ARID1A | R1989       | NA   | *:17                         | 2.45E-08 | 17  | 5  | Level-1 | ucec:9 coadread:5 stad:1 lymbc:1 cscs:1                                                                                                                        |
| APC    | R216        | NA   | *:14                         | 3.51E-08 | 14  | 1  | Level-3 | coadread:14                                                                                                                                                    |
| XP01   | E571        | NA   | K:12 V:1 A:1                 | 4.11E-08 | 14  | 5  | Level-2 | cli:7 ucec:2 coadread:2 brca:2 prad:1                                                                                                                          |
| CDKN2A | P114        | NA   | L:13 T:1 H:1                 | 5.43E-08 | 15  | 4  | Level-3 | skcm:11 hncs:2 lusc:1 cscs:1                                                                                                                                   |
| MYO18A | G979        | NA   | G:6 A:1                      | 5.52E-08 | 7   | 4  | Level-1 | acc:3 lihc:2 kirc:1 cscs:1                                                                                                                                     |
| TP53   | P151        | NA   | S:10 H:7 T:4 R:4 A:4 F:1     | 7.03E-08 | 30  | 17 | Level-3 | hncs:5 ov:3 coadread:3 brca:3 ucs:2 paad:2 lihc:2 ucec:1 stad:1 skcm:1 mmyl:1 lusc:1 luad:1 gg:1 esca:1 blca:1 acyc:1                                          |
| GNAQ   | T96         | NA   | S:7                          | 7.04E-08 | 7   | 5  | Level-1 | lihc:2 kich:2 prad:1 luad:1 gbc:1                                                                                                                              |
| BNC2   | S575        | NA   | R:7 I:1                      | 7.82E-08 | 8   | 3  | Level-1 | stad:5 coadread:2 luad:1                                                                                                                                       |
| NFE2L2 | Q26         | NA   | P:2 K:2 R:1 L:1 H:1          | 9.26E-08 | 7   | 5  | Level-1 | lusc:2 lihc:2 ucec:1 luad:1 esca:1                                                                                                                             |
| CDK4   | R24         | NA   | L:5 H:3 C:2 S:1              | 1.03E-07 | 11  | 3  | Level-3 | skcm:7 luad:3 mmyl:1                                                                                                                                           |
| LRP1   | P1058       | NA   | T:7 L:1                      | 1.05E-07 | 8   | 3  | Level-1 | prad:3 kirc:3 skcm:2                                                                                                                                           |
| DTD2   | R6          | NA   | W:11                         | 1.10E-07 | 11  | 6  | Level-1 | kirc:5 lihc:2 prad:1 kich:1 coadread:1 acc:1                                                                                                                   |
| SMAD2  | S464        | NA   | *:11                         | 1.19E-07 | 11  | 5  | Level-1 | coadread:5 stad:2 brca:2 paad:1 kirc:1                                                                                                                         |
| TP53   | A187_splice | NA   |                              | 1.70E-07 | 25  | 13 | Level-2 | ov:6 hncs:3 coadread:3 brca:3 stad:2 skcm:1 paad:1 lusc:1 luad:1 gg:1 kich:1 cli:1 blca:1                                                                      |
| RHEB   | Y35         | NA   | N:5 C:1                      | 1.71E-07 | 6   | 4  | Level-3 | ucec:2 kirc:2 kirc:1 blca:1                                                                                                                                    |
| HOXB2  | P335        | NA   | P:6                          | 2.27E-07 | 6   | 4  | Level-1 | luad:3 skcm:1 prad:1 kirc:1                                                                                                                                    |
| TP53   | R280        | NA   | K:15 T:10 G:6 I:5 S:4 *:1    | 2.47E-07 | 41  | 17 | Level-3 | hncs:7 blca:7 luad:5 brca:4 gg:3 skcm:2 ov:2 lihc:2 ucs:1 stad:1 npc:1 lusc:1 laml:1 esca:1 cscs:1 acc:1                                                       |
| SNRPD3 | G96         | NA   | V:4 S:1 R:1 C:1              | 2.59E-07 | 7   | 3  | Level-1 | luad:5 ucec:1 cscs:1                                                                                                                                           |
| GPRIN2 | T100        | NA   | P:7                          | 2.77E-07 | 7   | 4  | Level-1 | coadread:3 cscs:2 lihc:1 brca:1                                                                                                                                |
| ALK    | F1174       | NA   | L:6 C:2 V:1                  | 3.00E-07 | 9   | 1  | Level-3 | nbl:9                                                                                                                                                          |
| MED12  | L1224       | NA   | F:9 V:1                      | 3.01E-07 | 10  | 5  | Level-2 | prad:6 stad:1 paad:1 lusc:1 brca:1                                                                                                                             |
| ARL16  | G6          | NA   | R:7                          | 3.03E-07 | 7   | 1  | Level-1 | skcm:7                                                                                                                                                         |
| MAGOH  | I137        | NA   | T:6                          | 3.03E-07 | 6   | 4  | Level-1 | paad:3 nbl:1 hncs:1 gbm:1                                                                                                                                      |
| CCT8   | I86         | NA   | T:6                          | 3.15E-07 | 6   | 5  | Level-1 | paad:2 prad:1 lihc:1 gg:1 hncs:1                                                                                                                               |
| CCND1  | Y44         | NA   | D:2 S:1 H:1 F:1 C:1 *:1      | 3.48E-07 | 7   | 2  | Level-1 | mcl:6 mmyl:1                                                                                                                                                   |
| CRNKL1 | S128        | NA   | F:8 S:2                      | 3.99E-07 | 10  | 2  | Level-2 | skcm:8 cscs:2                                                                                                                                                  |
| TP53   | K132        | NA   | N:16 R:7 E:6 T:3 Q:1 M:1     | 4.00E-07 | 34  | 16 | Level-3 | ov:6 brca:6 blca:4 paad:3 luad:3 coadread:2 ucs:1 stad:1 mmyl:1 lusc:1 gg:1 hncs:1 gbm:1 esca:1 cscs:1 acc:1                                                   |
| NT5C3A | D322        | NA   | G:6                          | 4.75E-07 | 6   | 5  | Level-1 | acc:2 lihc:1 kich:1 gbc:1 brca:1                                                                                                                               |
| EGFR   | L861        | NA   | Q:7                          | 5.42E-07 | 7   | 2  | Level-3 | luad:5 lusc:2                                                                                                                                                  |
| PIK3R1 | M582_splice | NA   |                              | 5.68E-07 | 7   | 5  | Level-3 | ucec:2 gbm:2 prad:1 mbi:1 coadread:1                                                                                                                           |
| TP53   | C141        | NA   | Y:10 W:6 R:2 G:2 S:1 F:1 *:1 | 5.85E-07 | 23  | 12 | Level-3 | brca:5 prad:3 coadread:3 luad:2 gg:2 hncs:2 ucec:1 paad:1 mmyl:1 lusc:1 laml:1 kich:1                                                                          |
| RIMS1  | R71         | NA   | G:5 R:2                      | 7.62E-07 | 7   | 4  | Level-1 | stad:4 prad:1 paad:1 coadread:1                                                                                                                                |
| OXA1L  | L57         | NA   | F:9                          | 7.73E-07 | 9   | 3  | Level-1 | skcm:7 hncs:1 cscs:1                                                                                                                                           |

|          |             |      |                          |          |    |    |         |                                                                                                                                            |
|----------|-------------|------|--------------------------|----------|----|----|---------|--------------------------------------------------------------------------------------------------------------------------------------------|
| LENG8    | G377        | G340 | G:6                      | 9.64E-07 | 6  | 5  | Level-1 | lihc:2 mb 1 luad:1 gbm:1 blca:1                                                                                                            |
| APC      | R499        | NA   | *:13                     | 1.04E-06 | 13 | 3  | Level-3 | coadread:11 stad:1 paad:1                                                                                                                  |
| APC      | Q1429       | NA   | *:6 R:1                  | 1.04E-06 | 7  | 2  | Level-3 | coadread:6 ov:1                                                                                                                            |
| ING1     | R339        | R196 | *:11                     | 1.06E-06 | 11 | 5  | Level-1 | coadread:4 ucec:3 stad:2 l gg:1 blca:1                                                                                                     |
| SPOP     | W131        | NA   | G:4 S:1 R:1 C:1          | 1.15E-06 | 7  | 2  | Level-2 | prad:6 ucec:1                                                                                                                              |
| TPTE2    | M41         | NA   | V:8                      | 1.36E-06 | 8  | 6  | Level-1 | skcm:2 acc:2 stad:1 paad:1 luad:1 kich:1                                                                                                   |
| TRUB1    | T34         | NA   | P:6                      | 1.42E-06 | 6  | 4  | Level-1 | luad:3 paad:1 kirc:1 blca:1                                                                                                                |
| ACADS    | R330        | NA   | H:8 C:2                  | 1.50E-06 | 10 | 7  | Level-1 | prad:2 kirc:2 gbm:2 ucec:1 stad:1 l gg:1 coadread:1                                                                                        |
| ACSBG2   | I250        | NA   | M:5                      | 1.53E-06 | 5  | 2  | Level-1 | kirc:4 kirc:1                                                                                                                              |
| SPTA1    | K1732       | NA   | T:7                      | 1.61E-06 | 7  | 2  | Level-1 | stad:5 esca:2                                                                                                                              |
| TP53     | V274        | NA   | F:7 D:5 G:4 A:4 L:1      | 1.69E-06 | 21 | 11 | Level-3 | luad:4 lihc:3 brca:3 paad:2 ov:2 coadread:2 stad:1 skcm:1 prad:1 l usm:1 l gg:1                                                            |
| PTPN11   | Q510        | NA   | L:3 H:3 E:1              | 1.84E-06 | 7  | 4  | Level-1 | skcm:2 l am :2 gbm:2 all:1                                                                                                                 |
| SF3B1    | N626        | NA   | Y:3 H:2 D:1              | 2.06E-06 | 6  | 4  | Level-1 | cli:3 skcm:1 luad:1 brca:1                                                                                                                 |
| RAC1     | A178        | A159 | V:10                     | 2.27E-06 | 10 | 5  | Level-1 | hnsc:6 luad:1 hgg:1 coadread:1 cesc:1                                                                                                      |
| AR1H1    | A409        | NA   | E:6                      | 2.28E-06 | 6  | 6  | Level-1 | skcm:1 prad:1 luad:1 kirc:1 kich:1 acc:1                                                                                                   |
| KRAS     | G60         | NA   | G:10 D:1                 | 2.28E-06 | 11 | 7  | Level-1 | coadread:4 thca:2 skcm:1 paad:1 mmyl:1 csc:1 blca:1                                                                                        |
| TP53     | V216        | NA   | M:15 L:2 G:2 E:1         | 2.64E-06 | 20 | 11 | Level-3 | ov:4 brca:4 l gg:3 gbm:2 ucs:1 paad:1 l usc:1 luad:1 hnsc:1 esca:1 csc:1                                                                   |
| PIK3R1   | N564        | NA   | D:6                      | 2.89E-06 | 6  | 4  | Level-3 | l gg:2 coadread:2 ucec:1 skcm:1                                                                                                            |
| PIK3R1   | G376        | NA   | R:9                      | 2.90E-06 | 9  | 4  | Level-3 | gbm:5 l gg:2 ucs:1 skcm:1                                                                                                                  |
| PIK3CA   | Y1021       | NA   | C:7 H:2                  | 3.18E-06 | 9  | 6  | Level-1 | ucec:2 stad:2 coadread:2 ucs:1 prad:1 brca:1                                                                                               |
| C5orf49  | K130        | NA   | T:6                      | 3.65E-06 | 6  | 2  | Level-1 | stad:4 luad:2                                                                                                                              |
| NPAS1    | F159        | NA   | F:6 L:1                  | 3.89E-06 | 7  | 2  | Level-1 | skcm:6 blca:1                                                                                                                              |
| APC      | R564        | NA   | *:12                     | 4.00E-06 | 12 | 1  | Level-3 | coadread:12                                                                                                                                |
| NFE2L2   | L30         | NA   | F:3 P:2 H:2 R:1          | 4.52E-06 | 8  | 5  | Level-1 | hnsc:3 lusc:2 lihc:1 kirc:1                                                                                                                |
| RAF1     | S257        | NA   | L:11 W:1                 | 4.76E-06 | 12 | 4  | Level-3 | coadread:6 luad:3 stad:2 skcm:1                                                                                                            |
| TP53     | Q331_splice | NA   |                          | 4.87E-06 | 23 | 9  | Level-2 | ov:7 brca:4 luad:3 coadread:3 hnsc:2 paad:1 lusc:1 lihc:1 cli:1                                                                            |
| KIAA1468 | Q579        | NA   | K:6                      | 5.44E-06 | 6  | 5  | Level-1 | luad:2 prad:1 kirc:1 hnsc:1 acc:1                                                                                                          |
| BCL2L12  | F8          | NA   | F:8                      | 5.99E-06 | 8  | 2  | Level-1 | skcm:6 csc:2                                                                                                                               |
| SF3B1    | R625        | NA   | H:4 C:4 L:2 G:1          | 6.52E-06 | 11 | 4  | Level-2 | skcm:6 cli:2 acyc:2 blca:1                                                                                                                 |
| AH11     | Q294        | NA   | R:5                      | 6.91E-06 | 5  | 4  | Level-1 | luad:2 skcm:1 kirc:1 hnsc:1                                                                                                                |
| KDM6A    | Q555        | NA   | *:9                      | 7.26E-06 | 9  | 1  | Level-1 | blca:9                                                                                                                                     |
| FGFR1    | K687        | K656 | E:4 N:1 K:1 *:1          | 7.52E-06 | 7  | 6  | Level-2 | pias:2 mb 1 lihc:1 gbm:1 blca:1 all:1                                                                                                      |
| KIT      | K642        | NA   | E:5 N:1                  | 7.66E-06 | 6  | 2  | Level-3 | skcm:5 stad:1                                                                                                                              |
| TP53     | S241        | NA   | F:19 Y:10 C:6 P:3 A:2    | 7.75E-06 | 40 | 20 | Level-3 | ov:7 skcm:5 ucs:3 ucec:3 luad:2 hgg:2 gbm:2 gbc:2 brca:2 blca:2 paad:1 l ymbc:1 l gg:1 kirc:1 kirc:1 kich:1 hnsc:1 esca:1 csc:1 coadread:1 |
| OBP2B    | S133        | NA   | P:5                      | 7.91E-06 | 5  | 4  | Level-1 | paad:2 mb 1 luad:1 hnsc:1                                                                                                                  |
| APC      | R232        | NA   | *:12                     | 9.02E-06 | 12 | 2  | Level-2 | coadread:11 ucec:1                                                                                                                         |
| TP53     | L194        | NA   | R:15 H:3 F:3 P:2         | 9.05E-06 | 23 | 11 | Level-3 | brca:6 ov:3 luad:3 hnsc:2 coadread:2 blca:2 paad:1 lihc:1 l gg:1 gbm:1 cesc:1                                                              |
| MAP2K1   | F53         | NA   | L:4 V:1 I:1              | 9.12E-06 | 6  | 4  | Level-3 | coadread:3 stad:1 skcm:1 luad:1                                                                                                            |
| GNA11    | Q209        | NA   | L:5                      | 9.33E-06 | 5  | 1  | Level-3 | skcm:5                                                                                                                                     |
| MAPK7    | A501        | NA   | D:6                      | 9.50E-06 | 6  | 4  | Level-1 | kirc:2 acc:2 luad:1 lihc:1                                                                                                                 |
| TP53     | S33_splice  | NA   |                          | 1.03E-05 | 19 | 11 | Level-2 | lihc:4 coadread:3 ov:2 l usm:2 hnsc:2 ucs:1 paad:1 luad:1 esca:1 csc:1 brca:1                                                              |
| PRSS27   | V246        | NA   | G:5                      | 1.03E-05 | 5  | 3  | Level-1 | acc:3 l gg:1 kirc:1                                                                                                                        |
| PCDHA10  | G539        | NA   | A:8 V:1                  | 1.08E-05 | 9  | 7  | Level-1 | paad:2 luad:2 l gg:1 kirc:1 hnsc:1 gbm:1 blca:1                                                                                            |
| MAP2K2   | F57         | NA   | L:3 V:2                  | 1.29E-05 | 5  | 4  | Level-3 | skcm:2 stad:1 paad:1 hnsc:1                                                                                                                |
| PTPN11   | A72         | NA   | T:3 V:2 D:2              | 1.33E-05 | 7  | 4  | Level-2 | nbl:2 l gg:2 cli:2 l am :1                                                                                                                 |
| TP53     | V272        | NA   | M:17 G:4 V:1 L:1 K:1 E:1 | 1.43E-05 | 25 | 13 | Level-3 | ov:4 paad:3 luad:3 hnsc:3 stad:2 coadread:2 brca:2 ucec:1 mmyl:1 mb 1 kirc:1 csc:1 blca:1                                                  |
| SYT13    | P228        | NA   | S:7 T:1                  | 1.43E-05 | 8  | 3  | Level-1 | 1                                                                                                                                          |
| FAM46D   | S69         | NA   | R:4 G:2                  | 1.43E-05 | 6  | 2  | Level-1 | skcm:6 lusc:1 csc:1                                                                                                                        |
| PTN      | K44         | NA   | T:6 M:1                  | 1.46E-05 | 7  | 4  | Level-1 | stad:5 esca:1                                                                                                                              |
| TP53     | P278        | NA   | S:11 L:7 T:6 R:5 A:5 H:3 | 1.50E-05 | 37 | 13 | Level-3 | esca:3 stad:2 lusc:1 coadread:1                                                                                                            |
| HEXDC    | T482        | H452 | P:5                      | 1.59E-05 | 5  | 3  | Level-1 | hnsc:7 ov:5 coadread:5 lusc:4 brca:4 skcm:2 luad:2 esca:2 csc:2 ucec:1 paad:1 mmyl:1 l gg:1                                                |
| ZBTB7A   | K424        | NA   | T:4 N:1                  | 1.69E-05 | 5  | 3  | Level-1 | g:1                                                                                                                                        |
| EVPL     | C322        | NA   | C:6                      | 1.76E-05 | 6  | 5  | Level-1 | lusc:2 kirc:2 skcm:1                                                                                                                       |
| FGFR1    | N577        | N546 | K:5 D:1                  | 1.92E-05 | 6  | 5  | Level-2 | stad:3 kirc:1 coadread:1                                                                                                                   |
| TP53     | V225_splice | NA   |                          | 2.06E-05 | 22 | 11 | Level-2 | paad:2 luad:1 kich:1 coadread:1 blca:1                                                                                                     |
| TP53     | H214        | NA   | R:15 L:1                 | 2.08E-05 | 16 | 11 | Level-2 | pias:2 stad:1 nbl:1 mb 1 hgg:1                                                                                                             |
| ERBB2    | R678        | NA   | Q:9                      | 2.20E-05 | 9  | 6  | Level-3 | brca:5 ov:3 luad:3 hnsc:3 gbm:2 stad:1 lusc:1 lihc:1 l am :1 kich:1 csc:1                                                                  |
| PTEN     | C136        | NA   | R:4 Y:2 F:2 *:1          | 2.27E-05 | 9  | 5  | Level-1 | stad:2 paad:2 lusc:2 lihc:2 esca:2 ov:1 kich:1 gbm:1 coadread:1 cli:1 blca:1                                                               |
| CTNNA1   | N387        | NA   | K:4 Y:1 I:1              | 2.31E-05 | 6  | 3  | Level-2 | stad:4 ucec:1 prad:1 coadread:1 brca:1 blca:1                                                                                              |
| ERBB2    | D769        | NA   | Y:5 H:2 N:1              | 2.69E-05 | 8  | 5  | Level-3 | ucec:3 gbm:3 skcm:1 hnsc:1 coadread:1                                                                                                      |
| MEF2A    | P99         | NA   | S:7                      | 2.91E-05 | 7  | 6  | Level-1 | lihc:4 prad:1 coadread:1                                                                                                                   |
| FGFR3    | R248        | NA   | C:9                      | 3.55E-05 | 9  | 4  | Level-3 | brca:3 esca:2 stad:1 cesc:1 blca:1                                                                                                         |
| MYO18B   | P1018       | NA   | S:3 P:3 L:2 T:1          | 3.67E-05 | 9  | 2  | Level-1 | kirc:2 paad:1 mb 1 lusc:1 lihc:1 csc:1                                                                                                     |
| TP53     | T125_splice | NA   | SS:23                    | 3.85E-05 | 23 | 12 | Level-2 | blca:6 mmyl:1 lusc:1 hnsc:1                                                                                                                |
| CDKN2A   | E88         | NA   | *:10 K:5                 | 4.24E-05 | 15 | 5  | Level-1 | skcm:8 hnsc:1                                                                                                                              |
| COBL     | E480        | NA   | D:6                      | 4.36E-05 | 6  | 1  | Level-1 | hnsc:4 stad:3 l gg:3 ov:2 lusc:2 luad:2 brca:2 skcm:1 paad:1 esca:1 csc:1 acc:1                                                            |
| ATM      | N2875       | NA   | S:3 T:2 K:1              | 4.66E-05 | 6  | 4  | Level-1 | skcm:5 hnsc:5 paad:2 csc:2 cesc:1                                                                                                          |
|          |             |      |                          |          |    |    | Level-1 | lihc:6                                                                                                                                     |
|          |             |      |                          |          |    |    | Level-1 | lihc:2 coadread:2 prad:1 brca:1                                                                                                            |

|          |             |      |                         |          |    |    |         |                                                                                        |
|----------|-------------|------|-------------------------|----------|----|----|---------|----------------------------------------------------------------------------------------|
| ZHX3     | N249        | NA   | K:6                     | 4.76E-05 | 6  | 3  | Level-1 | stad:3 coadread:2 blca:1                                                               |
| APC      | Y935        | NA   | *:6                     | 4.90E-05 | 6  | 1  | Level-3 | coadread:6                                                                             |
| PLCB3    | T909        | NA   | P:5                     | 5.76E-05 | 5  | 2  | Level-1 | prad:3 luad:2                                                                          |
| CHIT1    | W358        | NA   | *:7                     | 5.86E-05 | 7  | 4  | Level-1 | lihc:2 coadread:2 acc:2 kich:1                                                         |
| FRMD4B   | P368        | NA   | S:5 L:1 F:1             | 6.05E-05 | 7  | 2  | Level-1 | skcm:6 csc:1                                                                           |
| PCSK5    | W924        | NA   | *:7 L:1                 | 6.25E-05 | 8  | 3  | Level-1 | skcm:6 lihc:1 csc:1                                                                    |
| KRAS     | K117        | NA   | N:9                     | 6.60E-05 | 9  | 6  | Level-3 | coadread:3 mmyl:2 stad:1 skcm:1 lihc:1 esca:1                                          |
| C3orf70  | S6          | NA   | L:9 W:2 *:1             | 7.54E-05 | 12 | 4  | Level-1 | blca:6 csc:4 usc:1 brca:1                                                              |
| APC      | Q1338       | NA   | *:6                     | 7.56E-05 | 6  | 1  | Level-3 | coadread:6                                                                             |
| CHD3     | I293        | I234 | L:5                     | 7.69E-05 | 5  | 4  | Level-1 | luad:2 paad:1 lgg:1 hnc:1                                                              |
| OVGP1    | S536        | NA   | G:5                     | 8.06E-05 | 5  | 3  | Level-1 | lihc:2 coadread:2 kich:1                                                               |
| INMT     | S212        | NA   | F:8 S:1                 | 8.30E-05 | 9  | 2  | Level-1 | skcm:8 csc:1                                                                           |
| LAMC1    | P641        | NA   | P:4 L:2                 | 9.33E-05 | 6  | 5  | Level-1 | usc:2 thca:1 skcm:1 lgg:1 gbm:1                                                        |
| LCE1A    | K28         | NA   | T:2 R:2 M:1             | 0.0001   | 5  | 2  | Level-1 | stad:4 esca:1                                                                          |
| PPP6C    | R301        | R264 | C:14                    | 0.0001   | 14 | 2  | Level-2 | skcm:13 usc:1                                                                          |
| NFE2L2   | G31         | NA   | A:4 R:2 V:1 E:1         | 0.0001   | 8  | 5  | Level-1 | usc:2 esca:2 blca:2 luad:1 lihc:1                                                      |
| U2AF1    | Q157        | NA   | R:2 P:2                 | 0.0001   | 4  | 2  | Level-3 | mds:3 laml:1                                                                           |
| CDH1     | Q23         | NA   | *:7                     | 0.0001   | 7  | 1  | Level-1 | brca:7                                                                                 |
| SF3B1    | G742        | NA   | D:6                     | 0.0001   | 6  | 2  | Level-2 | cl:5 kirc:1                                                                            |
| KAT8     | R98         | NA   | W:7 Q:1                 | 0.0001   | 8  | 4  | Level-1 | stad:3 prad:2 coadread:2 skcm:1                                                        |
| SEMA4B   | S231        | NA   | S:4 F:2                 | 0.0001   | 6  | 2  | Level-1 | skcm:3 csc:3                                                                           |
| CTNNB1   | H36         | NA   | P:5 Y:1                 | 0.0001   | 6  | 2  | Level-1 | lihc:5 skcm:1                                                                          |
| ERBB2    | V777        | NA   | L:4 M:1                 | 0.0001   | 5  | 3  | Level-3 | coadread:2 brca:2 stad:1                                                               |
| PNLIPRP3 | K431        | NA   | T:5 R:1                 | 0.0001   | 6  | 2  | Level-1 | stad:3 esca:3                                                                          |
| NFE2L2   | R34         | NA   | G:7 Q:4 P:2             | 0.0001   | 13 | 6  | Level-1 | usc:5 ucec:2 hnc:2 blca:2 kirc:1 csc:1                                                 |
| FGFR2    | S252        | NA   | W:10 S:2                | 0.0001   | 12 | 3  | Level-2 | ucec:9 stad:2 ucs:1                                                                    |
| FBXW7    | R367        | NA   | *:12                    | 0.0001   | 12 | 6  | Level-2 | coadread:7 ucs:1 stad:1 paad:1 hnc:1 csc:1                                             |
| FOXA1    | I176        | NA   | M:4 V:3                 | 0.0002   | 7  | 2  | Level-1 | brca:6 luad:1                                                                          |
| SLC4A11  | V718        | V691 | G:5                     | 0.0002   | 5  | 3  | Level-1 | brca:3 prad:1 lihc:1                                                                   |
| H3F3A    | G35         | G34  | R:6                     | 0.0002   | 6  | 4  | Level-3 | hgg:3 lgg:1 gbm:1 acc:1                                                                |
| FGFR2    | C383        | C382 | R:4 Y:1                 | 0.0002   | 5  | 3  | Level-3 | ucec:3 stad:1 esca:1                                                                   |
| KIAA0020 | K63         | NA   | R:5                     | 0.0002   | 5  | 4  | Level-1 | paad:2 skcm:1 luad:1 gbm:1                                                             |
| TP53     | F270        | NA   | S:5 L:4 I:4 C:2 V:1     | 0.0002   | 16 | 9  | Level-3 | stad:3 brca:3 ov:2 luad:2 lgg:2 usc:1 hnc:1 esca:1 csc:1                               |
| SF3B1    | K666        | NA   | T:2 E:2 Q:1             | 0.0002   | 5  | 4  | Level-2 | cl:2 skcm:1 lihc:1 brca:1                                                              |
| PIK3R1   | R348        | NA   | *:14                    | 0.0002   | 14 | 3  | Level-3 | ucec:8 coadread:5 brca:1                                                               |
| PIK3R1   | K567        | NA   | E:5                     | 0.0002   | 5  | 4  | Level-1 | ucec:2 stad:1 lymbc:1 esca:1                                                           |
| ALK      | R1275       | NA   | Q:10 L:1 *:1            | 0.0002   | 12 | 2  | Level-3 | nbl:11 brca:1                                                                          |
| U2AF1    | I24         | NA   | T:3 V:1                 | 0.0002   | 4  | 4  | Level-1 | ucec:1 stad:1 paad:1 acc:1                                                             |
| DNAJB1   | L190        | NA   | L:4                     | 0.0002   | 4  | 4  | Level-1 | prad:1 lihc:1 hnc:1 gbm:1                                                              |
| STAT3    | H410        | NA   | R:3 P:2                 | 0.0002   | 5  | 3  | Level-1 | lihc:3 luad:1 brca:1                                                                   |
| PIK3CA   | E81         | NA   | K:12 *:1                | 0.0002   | 13 | 9  | Level-2 | coadread:3 brca:3 ucec:1 mbl:1 luad:1 kirc:1 hnc:1 gbm:1 csc:1                         |
| TP53     | E225_splice | NA   | SS:19                   | 0.0002   | 19 | 12 | Level-2 | hnc:5 ov:3 luad:2 stad:1 skcm:1 paad:1 mmyl:1 usc:1 lgg:1 kich:1 esca:1 brca:1         |
| PTPN11   | E76         | NA   | K:4 A:2 G:1             | 0.0002   | 7  | 5  | Level-2 | mmyl:2 coadread:2 pias:1 nbl:1 usc:1                                                   |
| EGFR     | G719        | NA   | A:5 D:1 C:1             | 0.0003   | 7  | 2  | Level-3 | luad:6 gbm:1                                                                           |
| EHMT1    | V280        | NA   | F:5                     | 0.0003   | 5  | 2  | Level-1 | paad:3 lihc:2                                                                          |
| WDR73    | G316        | NA   | R:5                     | 0.0003   | 5  | 4  | Level-1 | lihc:2 kirc:1 coadread:1 brca:1                                                        |
| TMEM131  | E1319       | NA   | Q:4 *:2 K:1             | 0.0003   | 7  | 5  | Level-1 | csc:2 brca:2 luad:1 hnc:1 blca:1                                                       |
| WDR52    | V1227       | V408 | G:5                     | 0.0003   | 5  | 1  | Level-1 | kirc:5                                                                                 |
| SMAD4    | D351        | NA   | G:3 Y:2 H:2 A:1         | 0.0003   | 8  | 6  | Level-1 | paad:2 coadread:2 stad:1 prad:1 luad:1 esca:1                                          |
| DICER1   | E1813       | NA   | G:3 Q:2 A:1             | 0.0003   | 6  | 4  | Level-2 | ucec:2 coadread:2 thca:1 gbm:1                                                         |
| HOOK2    | S630        | NA   | S:3 F:2 A:1             | 0.0003   | 6  | 3  | Level-1 | skcm:4 prad:1 csc:1                                                                    |
| KLF5     | E419        | NA   | Q:4 K:3                 | 0.0003   | 7  | 4  | Level-1 | luad:3 usc:2 csc:1 blca:1                                                              |
| LST3     | R709        | NA   | R:4 T:1 K:1             | 0.0003   | 6  | 3  | Level-1 | csc:4 skcm:1 luad:1                                                                    |
| HSD11B1  | G45         | NA   | V:2 R:2 W:1 G:1 E:1     | 0.0003   | 7  | 3  | Level-1 | skcm:3 luad:3 brca:1                                                                   |
| RBM39    | T353        | NA   | I:4 T:1                 | 0.0004   | 5  | 3  | Level-1 | ucec:3 luad:1 hnc:1                                                                    |
| PCBP1    | L102        | NA   | Q:2 R:1 P:1             | 0.0004   | 4  | 1  | Level-1 | coadread:4                                                                             |
| BCL2L12  | F17         | NA   | F:7                     | 0.0004   | 7  | 2  | Level-2 | skcm:4 csc:3                                                                           |
| SPOP     | Y87         | NA   | S:2 N:2 C:1             | 0.0004   | 5  | 1  | Level-2 | prad:5                                                                                 |
| MYC      | T73         | T58  | P:3 I:2                 | 0.0004   | 5  | 5  | Level-3 | skcm:1 nbl:1 lymbc:1 luad:1 esca:1                                                     |
| TROAP    | S562        | NA   | I:5                     | 0.0004   | 5  | 2  | Level-1 | paad:3 lgg:2                                                                           |
| PTPN11   | G503        | NA   | V:6 G:1                 | 0.0004   | 7  | 5  | Level-3 | stad:2 luad:2 mmyl:1 usc:1 coadread:1                                                  |
| ACVR1    | R258        | NA   | G:4 M:1                 | 0.0005   | 5  | 2  | Level-2 | hgg:4 stad:1                                                                           |
| PIK3CA   | V344        | NA   | G:5 M:4 A:2             | 0.0005   | 11 | 8  | Level-3 | ucec:3 coadread:2 skcm:1 lymbc:1 hnc:1 gbm:1 csc:1 brca:1                              |
| ARID3A   | S557        | NA   | G:4                     | 0.0005   | 4  | 2  | Level-1 | stad:3 ucec:1                                                                          |
| THBD     | C554        | NA   | C:7                     | 0.0005   | 7  | 3  | Level-1 | stad:4 coadread:2 ucec:1                                                               |
| TP53     | G244        | NA   | D:9 C:8 S:5 V:2 R:1 G:1 | 0.0005   | 26 | 13 | Level-3 | ov:5 esca:3 coadread:3 ucec:2 stad:2 usc:2 luad:2 gbm:2 ucs:1 usm:1 lihc:1 lgg:1 hnc:1 |
| SMARCA4  | G1232       | NA   | S:6 C:2 V:1             | 0.0006   | 9  | 6  | Level-1 | luad:3 mbl:2 stad:1 skcm:1 lymbc:1 kirc:1                                              |
| RARA     | F286        | NA   | S:2 I:1 C:1             | 0.0006   | 4  | 3  | Level-1 | luad:2 csc:1 brca:1                                                                    |
| CCND1    | P287        | NA   | L:3 S:2 T:1             | 0.0006   | 6  | 5  | Level-2 | ucec:2 ucs:1 skcm:1 hnc:1 csc:1                                                        |
| CYP4A11  | I491        | NA   | M:3 T:1                 | 0.0006   | 4  | 2  | Level-1 | lihc:3 brca:1                                                                          |

|          |       |      |                          |        |    |    |         |                                                                                              |
|----------|-------|------|--------------------------|--------|----|----|---------|----------------------------------------------------------------------------------------------|
| MAX      | R60   | NA   | Q:9                      | 0.0006 | 9  | 6  | Level-1 | ucec:2 lgg:2 coadread:2 stad:1 mbl:1 lami:1                                                  |
| ARAF     | S214  | NA   | F:3 S:1 C:1 A:1          | 0.0006 | 6  | 3  | Level-2 | luad:3 skcm:2 kirp:1                                                                         |
| RQCD1    | S87   | NA   | P:3 C:3                  | 0.0006 | 6  | 5  | Level-2 | skcm:2 stad:1 prad:1 lihc:1 blca:1                                                           |
| ABCC10   | R570  | NA   | W:5 Q:2 L:1              | 0.0006 | 8  | 7  | Level-1 | gbm:2 prad:1 lusc:1 lgg:1 kirp:1 hpsc:1 brca:1                                               |
| FRMD6    | S17   | NA   | S:3 I:1 C:1              | 0.0006 | 5  | 3  | Level-1 | ucec:2 lihc:2 acc:1                                                                          |
| NCR1     | E42   | NA   | K:6 G:1 E:1              | 0.0007 | 8  | 2  | Level-1 | skcm:7 stad:1                                                                                |
| CELSR1   | W1958 | NA   | G:4 C:1                  | 0.0007 | 5  | 4  | Level-1 | coadread:2 ov:1 luad:1 gbm:1                                                                 |
| LRP5     | S1609 | NA   | P:4 S:1                  | 0.0007 | 5  | 4  | Level-1 | prad:2 paad:1 luad:1 csc:1                                                                   |
| MYO9A    | P1300 | NA   | S:5 P:1 L:1              | 0.0007 | 7  | 3  | Level-1 | skcm:5 luad:1 lihc:1                                                                         |
| CYP2C8   | P402  | NA   | S:7 L:2                  | 0.0008 | 9  | 2  | Level-1 | skcm:7 csc:2                                                                                 |
| PIK3CA   | N1044 | NA   | K:4 Y:2                  | 0.0008 | 6  | 3  | Level-1 | ucec:2 kirc:2 brca:2                                                                         |
| CDK4     | K22   | NA   | Q:2 M:2                  | 0.0008 | 4  | 2  | Level-1 | skcm:3 mmyl:1                                                                                |
| HIST1H3C | K37   | NA   | M:5                      | 0.0008 | 5  | 2  | Level-1 | hpsc:4 skcm:1                                                                                |
| TP53     | N239  | NA   | S:8 D:6 T:1              | 0.0009 | 15 | 12 | Level-3 | ucec:2 luad:2 hpsc:2 lusc:1 stad:1 prad:1 ov:1 lihc:1 kirc:1 kich:1 coadread:1 brca:1        |
| LRRC71   | K324  | NA   | K:4                      | 0.0009 | 4  | 4  | Level-1 | paad:1 lihc:1 kirp:1 hpsc:1                                                                  |
| CRB1     | F630  | NA   | V:5 S:1                  | 0.0009 | 6  | 3  | Level-1 | stad:4 paad:1 esca:1                                                                         |
| AMPD1    | L631  | L598 | F:4 V:1                  | 0.0009 | 5  | 3  | Level-1 | ucec:2 paad:2 esca:1                                                                         |
| EBF2     | G444  | NA   | E:8 V:1                  | 0.0009 | 9  | 4  | Level-1 | skcm:6 ucec:1 gbm:1 csc:1                                                                    |
| TUBGCP4  | A8    | NA   | D:4 T:1                  | 0.0010 | 5  | 4  | Level-1 | hpsc:2 prad:1 luad:1 esca:1                                                                  |
| CIZ1     | L59   | NA   | P:4                      | 0.0010 | 4  | 3  | Level-1 | gbm:2 lgg:1 kirp:1                                                                           |
| TP53     | I255  | NA   | F:7 S:3 N:2 T:1          | 0.0010 | 13 | 7  | Level-2 | esca:3 brca:3 paad:2 luad:2 lgg:1 gbm:1 cll:1                                                |
| PASD1    | M338  | NA   | I:5                      | 0.0010 | 5  | 1  | Level-1 | skcm:5                                                                                       |
| TP53     | E286  | NA   | K:17 *:7 G:4 Q:3 V:1 A:1 | 0.0011 | 33 | 15 | Level-3 | luad:6 brca:5 stad:3 hpsc:3 skcm:2 lusc:2 lihc:2 csc:2 coadread:2 paad:1 ov:1 lgg:1 lami:1   |
| IL7R     | K395  | NA   | T:3 R:2 N:1 M:1 K:1      | 0.0011 | 8  | 5  | Level-1 | 1 esca:1 blca:1                                                                              |
| SSBP3    | K6    | NA   | R:4                      | 0.0011 | 4  | 3  | Level-1 | esca:3 skcm:2 ucec:1 stad:1 luad:1                                                           |
| PARP1    | G500  | NA   | G:6                      | 0.0012 | 6  | 1  | Level-1 | acc:2 lihc:1 csc:1                                                                           |
| SLCO1B7  | E27   | NA   | K:9                      | 0.0012 | 9  | 6  | Level-1 | stad:6                                                                                       |
| ACVR1    | G328  | NA   | E:4 V:2                  | 0.0013 | 6  | 1  | Level-3 | skcm:3 coadread:2 gbm:1 csc:1 cesc:1 brca:1                                                  |
| PCMTD1   | P342  | NA   | L:6 T:1 P:1              | 0.0013 | 8  | 6  | Level-1 | hgg:6                                                                                        |
| BCL2L12  | R18   | NA   | W:7                      | 0.0013 | 7  | 2  | Level-1 | kich:2 hpsc:2 skcm:1 prad:1 paad:1 luad:1                                                    |
| TGFBR2   | R553  | R528 | C:5 H:4 L:1              | 0.0013 | 10 | 5  | Level-1 | skcm:5 csc:2                                                                                 |
| VPS37B   | Y191  | NA   | S:4                      | 0.0014 | 4  | 4  | Level-1 | coadread:4 paad:2 hpsc:2 stad:1 luad:1                                                       |
| C16orf80 | R100  | NA   | C:6 H:1                  | 0.0014 | 7  | 4  | Level-1 | skcm:1 ov:1 mbl:1 luad:1                                                                     |
| TRIM65   | H383  | NA   | N:3 L:1                  | 0.0014 | 4  | 4  | Level-1 | stad:3 coadread:2 cesc:1 brca:1                                                              |
| VHL      | N78   | NA   | S:3 D:2 Y:1              | 0.0014 | 6  | 2  | Level-1 | lusc:1 luad:1 lihc:1 hpsc:1                                                                  |
| MTOR     | C1483 | NA   | F:2 Y:1 W:1 R:1          | 0.0015 | 5  | 3  | Level-3 | kirc:5 paad:1                                                                                |
| DDX28    | S442  | NA   | S:3 F:2                  | 0.0015 | 5  | 1  | Level-1 | kirc:3 gbm:1 brca:1                                                                          |
| S100A8   | K49   | NA   | R:5                      | 0.0015 | 5  | 5  | Level-1 | skcm:5                                                                                       |
| BTBD11   | K1003 | NA   | T:3 R:1 M:1              | 0.0015 | 5  | 3  | Level-1 | thca:1 prad:1 luad:1 hpsc:1 gbm:1                                                            |
| TARBP2   | E191  | NA   | *:5 E:1                  | 0.0016 | 6  | 3  | Level-1 | stad:3 paad:1 esca:1                                                                         |
| ZNF623   | T500  | NA   | K:5                      | 0.0016 | 5  | 2  | Level-1 | coadread:3 ucec:2 skcm:1                                                                     |
| SLC16A13 | F158  | NA   | L:4                      | 0.0016 | 4  | 4  | Level-1 | hpsc:4 luad:1                                                                                |
| TP53     | S215  | NA   | I:6 R:5 G:3 N:1          | 0.0016 | 15 | 9  | Level-3 | stad:1 paad:1 luad:1 hpsc:1                                                                  |
| PIK3CA   | G106  | NA   | V:7 R:1                  | 0.0017 | 8  | 6  | Level-3 | lihc:3 paad:2 ov:2 luad:2 brca:2 stad:1 lusc:1 lami:1 esca:1                                 |
| UCHL1    | H161  | NA   | Y:5                      | 0.0017 | 5  | 1  | Level-1 | ucs:2 coadread:2 ucec:1 lusc:1 cesc:1 blca:1                                                 |
| TPSD1    | P22   | NA   | R:6 P:3                  | 0.0017 | 9  | 5  | Level-1 | skcm:5                                                                                       |
| INTS12   | M1    | NA   | V:2 T:1 L:1              | 0.0017 | 4  | 2  | Level-1 | acc:4 blca:2 lihc:1 lgg:1 coadread:1                                                         |
| FRMD6    | F6    | NA   | F:4                      | 0.0017 | 4  | 2  | Level-1 | mmyl:2 luad:2                                                                                |
| UBXN11   | S494  | NA   | C:4                      | 0.0018 | 4  | 2  | Level-1 | lihc:3 acc:1                                                                                 |
| SPOP     | F102  | NA   | V:2 C:2 L:1              | 0.0018 | 5  | 1  | Level-3 | coadread:3 lihc:1                                                                            |
| PIK3CA   | C378  | NA   | R:3 Y:2 F:1              | 0.0018 | 6  | 5  | Level-1 | prad:5                                                                                       |
| NFIC     | S339  | NA   | P:4                      | 0.0019 | 4  | 3  | Level-1 | ucec:2 stad:1 lgg:1 gbm:1 brca:1                                                             |
| FBXW7    | R658  | NA   | *:10 Q:3 R:1             | 0.0020 | 14 | 8  | Level-2 | paad:2 luad:1 lihc:1                                                                         |
| MICA     | I236  | NA   | T:4                      | 0.0020 | 4  | 2  | Level-1 | coadread:4 ucec:3 cesc:2 lusc:1 skcm:1 hpsc:1 gbm:1 blca:1                                   |
| PODXL    | S22   | NA   | P:4                      | 0.0020 | 4  | 3  | Level-1 | lihc:3 coadread:1                                                                            |
| XPO6     | I274  | NA   | T:3 V:1                  | 0.0020 | 4  | 3  | Level-1 | acc:2 kirp:1 kirc:1                                                                          |
| CLECL1   | Y50   | NA   | N:4                      | 0.0020 | 4  | 1  | Level-1 | paad:2 skcm:1 luad:1                                                                         |
| MXRA5    | G792  | NA   | G:9                      | 0.0021 | 9  | 1  | Level-1 | lihc:4                                                                                       |
| TSC22D2  | S735  | NA   | Y:4 F:2                  | 0.0022 | 6  | 5  | Level-1 | skcm:9                                                                                       |
| KIF26B   | R2024 | NA   | H:5 C:2 S:1              | 0.0023 | 8  | 7  | Level-1 | ucec:2 stad:1 skcm:1 coadread:1 brca:1                                                       |
| TP53     | T125  | NA   | T:36 M:7 P:2 R:1 K:1     | 0.0024 | 47 | 20 | Level-2 | stad:2 ov:1 luad:1 lgg:1 hpsc:1 gbm:1 coadread:1                                             |
| S100A3   | P97   | NA   | S:3 P:2                  | 0.0024 | 5  | 3  | Level-1 | luad:10 hpsc:6 coadread:5 lusc:4 stad:3 ov:2 lihc:2 esca:2 brca:2 skcm:1 paad:1 lusc:1 lgg:1 |
| TMEM200C | R19   | NA   | C:5 S:1 H:1              | 0.0025 | 7  | 4  | Level-1 | :1 lami:1 kich:1 hgg:1 gbm:1 csc:1 blca:1 acc:1                                              |
| SWI5     | P34   | NA   | S:7                      | 0.0026 | 7  | 2  | Level-1 | skcm:3 stad:1 luad:1                                                                         |
| TUBGCP6  | S1192 | NA   | S:4                      | 0.0026 | 4  | 3  | Level-1 | stad:3 skcm:2 paad:1 coadread:1                                                              |
| CSPG5    | R365  | NA   | R:3 Q:2 W:1              | 0.0026 | 6  | 4  | Level-1 | skcm:6 csc:1                                                                                 |
| METTL14  | R298  | NA   | P:4 H:4                  | 0.0027 | 8  | 3  | Level-1 | lgg:2 prad:1 hpsc:1                                                                          |
| BRD7     | Y455  | NA   | *:4                      | 0.0027 | 4  | 1  | Level-1 | paad:3 prad:1 ov:1 hpsc:1                                                                    |
|          |       |      |                          |        |    |    | Level-1 | ucec:4 paad:3 npc:1                                                                          |
|          |       |      |                          |        |    |    | Level-1 | lihc:4                                                                                       |

|          |              |       |                                     |        |    |    |         |                                                       |
|----------|--------------|-------|-------------------------------------|--------|----|----|---------|-------------------------------------------------------|
| ARID2    | S297         | NA    | F:8                                 | 0.0029 | 8  | 1  | Level-1 | skcm:8                                                |
| LTN1     | S19          | NA    | F:6 Y:1                             | 0.0029 | 7  | 2  | Level-1 | skcm:5 csc:2                                          |
| TP53     | L111         | NA    | P:5 R:4 Q:3                         | 0.0029 | 12 | 8  | Level-2 | lihc:3 lusc:2 brca:2 stad:1 skcm:1 gbm:1 esca:1 cll:1 |
| PANK3    | I301         | NA    | F:4                                 | 0.0029 | 4  | 4  | Level-1 | lihc:1 kich:1 coadread:1 acc:1                        |
| RSBN1L   | L432         | NA    | V:4                                 | 0.0030 | 4  | 1  | Level-1 | brca:4                                                |
| MYT1L    | K203         | NA    | T:3 R:1                             | 0.0030 | 4  | 3  | Level-1 | esca:2 lusc:1 paad:1                                  |
| TMEM147  | A92          | NA    | V:4 A:1                             | 0.0030 | 5  | 4  | Level-1 | gbm:2 ucec:1 prad:1 lihc:1                            |
| EGFR     | R108         | NA    | K:7 G:1                             | 0.0031 | 8  | 3  | Level-3 | gbm:5 lgg:2 hgg:1                                     |
| SMAD4    | D537         | NA    | H:4 E:2 Y:1 V:1 G:1                 | 0.0033 | 9  | 3  | Level-1 | coadread:7 paad:1 lusc:1                              |
| PSG4     | E263         | NA    | K:7                                 | 0.0034 | 7  | 2  | Level-1 | skcm:5 hnc:2                                          |
| PDHA1    | G145         | G107  | D:5                                 | 0.0035 | 5  | 4  | Level-1 | paad:2 lgg:1 hnc:1 gbm:1                              |
| LSM14A   | R272         | NA    | C:7 H:1                             | 0.0035 | 8  | 5  | Level-1 | coadread:4 ucec:1 paad:1 gbm:1 esca:1                 |
| THRA     | R79          | NA    | H:7                                 | 0.0036 | 7  | 4  | Level-1 | paad:4 lgg:1 hnc:1 gbm:1                              |
| FANK1    | Q4           | NA    | *:5                                 | 0.0036 | 5  | 3  | Level-1 | acc:3 lihc:1 gbc:1                                    |
| ASF1B    | P21          | NA    | L:3 P:2                             | 0.0038 | 5  | 2  | Level-1 | skcm:3 csc:2                                          |
| MAX      | H28          | NA    | R:4                                 | 0.0040 | 4  | 1  | Level-1 | ucec:4                                                |
| APC      | Q1406        | NA    | *:7                                 | 0.0040 | 7  | 2  | Level-3 | coadread:6 skcm:1                                     |
| APC      | E1408        | NA    | *:7                                 | 0.0040 | 7  | 1  | Level-3 | coadread:7                                            |
| UBE2D3   | M32          | M30   | I:3 V:1                             | 0.0042 | 4  | 4  | Level-1 | skcm:1 luad:1 hnc:1 blca:1                            |
| MET      | D1010_splice | NA    |                                     | 0.0042 | 5  | 2  | Level-3 | luad:4 lgg:1                                          |
| TBX2     | S192         | NA    | I:4                                 | 0.0043 | 4  | 3  | Level-1 | lihc:2 lgg:1 acc:1                                    |
| ANKZF1   | A650         | NA    | V:4 A:1                             | 0.0043 | 5  | 5  | Level-1 | ucs:1 skcm:1 paad:1 luad:1 lgg:1                      |
| PIK3CA   | R38          | NA    | H:7 C:4 S:1 L:1 G:1                 | 0.0044 | 14 | 6  | Level-3 | ucec:6 stad:2 gbm:2 coadread:2 lusc:1 csc:1           |
| ELTD1    | S11          | NA    | F:5 S:3 P:1                         | 0.0044 | 9  | 4  | Level-1 | skcm:5 csc:2 lusc:1 luad:1                            |
| RPL10L   | K156         | NA    | R:3 T:1 M:1                         | 0.0044 | 5  | 4  | Level-1 | luad:2 stad:1 esca:1 coadread:1                       |
| MTOR     | I2500        | NA    | M:3 F:1                             | 0.0045 | 4  | 4  | Level-3 | ucec:1 stad:1 kirc:1 brca:1                           |
| RHOA     | E40          | NA    | Q:6 K:1 *:1                         | 0.0045 | 8  | 4  | Level-3 | hnc:5 stad:1 luad:1 brca:1                            |
| RHOA     | R5           | NA    | W:5 Q:4 L:1                         | 0.0045 | 10 | 5  | Level-3 | lymbc:3 stad:2 esca:2 brca:2 coadread:1               |
| PCED1B   | S343         | NA    | F:6 Y:1 P:1                         | 0.0045 | 8  | 3  | Level-1 | skcm:5 csc:2 hnc:1                                    |
| MYC      | S161         | S146  | L:6                                 | 0.0046 | 6  | 4  | Level-1 | hnc:3 skcm:1 luad:1 coadread:1                        |
| NOL4     | L423         | NA    | L:3 V:1 M:1                         | 0.0047 | 5  | 2  | Level-1 | esca:4 luad:1                                         |
| DNAH9    | E2368        | NA    | K:7 D:1                             | 0.0047 | 8  | 2  | Level-1 | skcm:7 esca:1                                         |
| CHST12   | V12          | NA    | G:4                                 | 0.0049 | 4  | 2  | Level-1 | luad:2 hnc:2                                          |
| KCNQ5    | G273         | NA    | E:7 R:1                             | 0.0049 | 8  | 1  | Level-1 | skcm:8                                                |
| ZNF516   | A256         | NA    | D:5                                 | 0.0051 | 5  | 3  | Level-1 | kirp:2 kirc:2 acc:1                                   |
| CR1      | R1842        | R1392 | C:5 H:4                             | 0.0052 | 9  | 7  | Level-1 | skcm:3 ucec:1 luad:1 kirc:1 csc:1 coadread:1 blca:1   |
| RINT1    | K85          | NA    | T:2 N:2                             | 0.0052 | 4  | 2  | Level-1 | lgg:2 csc:2                                           |
| TGFBRAP1 | P824         | NA    | S:2 L:2 P:1 F:1                     | 0.0052 | 6  | 2  | Level-1 | skcm:4 csc:2                                          |
| TOP2B    | R651         | R656  | H:7                                 | 0.0053 | 7  | 5  | Level-1 | coadread:3 ucec:1 stad:1 paad:1 mbl:1                 |
| PACS2    | Q87          | NA    | H:3 Q:1                             | 0.0053 | 4  | 3  | Level-1 | esca:2 stad:1 lihc:1                                  |
| ZNF649   | R198         | NA    | I:5 S:1 K:1                         | 0.0054 | 7  | 4  | Level-1 | ucec:3 coadread:2 stad:1 paad:1                       |
| TP53     | Q144         | NA    | *:12 P:1 L:1 H:1                    | 0.0054 | 15 | 8  | Level-3 | luad:7 hnc:2 ucec:1 stad:1 ov:1 lihc:1 brca:1 blca:1  |
| VHL      | V155_splice  | NA    |                                     | 0.0055 | 6  | 1  | Level-3 | kirc:6                                                |
| TACC3    | P417         | NA    | S:4 P:2                             | 0.0056 | 6  | 3  | Level-1 | skcm:4 luad:1 acc:1                                   |
| ATP6V1B2 | P352         | NA    | S:4 P:1                             | 0.0056 | 5  | 3  | Level-1 | skcm:3 nbl:1 csc:1                                    |
| KCNJ8    | G417         | NA    | E:5 R:1 D:1                         | 0.0058 | 7  | 2  | Level-1 | skcm:6 csc:1                                          |
| TP53     | D281         | NA    | Y:8 N:7 V:4 E:4 H:2 D:2 P:1 G:1 A:1 | 0.0059 | 30 | 18 | Level-3 | 1 hnc:1 csc:1 cll:1 blca:1                            |
| ARHGAP28 | L277         | L259  | R:3 P:2                             | 0.0061 | 5  | 3  | Level-1 | stad:2 coadread:2 esca:1                              |
| MEF2A    | Y105         | NA    | C:4                                 | 0.0061 | 4  | 4  | Level-1 | mbl:1 lihc:1 kirc:1 csc:1                             |
| TCF20    | P815         | NA    | L:4 S:2                             | 0.0061 | 6  | 2  | Level-1 | skcm:4 csc:2                                          |
| BRAF     | L597         | NA    | Q:2 S:1 R:1                         | 0.0062 | 4  | 3  | Level-3 | skcm:2 prad:1 mmyl:1                                  |
| CANT1    | K131         | NA    | R:4                                 | 0.0062 | 4  | 3  | Level-1 | prad:2 lgg:1 hnc:1                                    |
| ARID1A   | R1335        | NA    | *:9                                 | 0.0062 | 9  | 6  | Level-1 | ucec:4 stad:1 lgg:1 esca:1 coadread:1 brca:1          |
| LCE1F    | P27          | NA    | P:7 Q:2 L:1                         | 0.0063 | 10 | 2  | Level-1 | skcm:9 hnc:1                                          |
| ACP6     | V29          | NA    | G:4                                 | 0.0063 | 4  | 3  | Level-1 | kirp:2 lihc:1 acc:1                                   |
| MAGEC1   | K1046        | NA    | N:6                                 | 0.0064 | 6  | 3  | Level-1 | coadread:3 stad:2 esca:1                              |
| ACVR1B   | R485         | R444  | *:8                                 | 0.0065 | 8  | 2  | Level-1 | stad:4 coadread:4                                     |
| BRAF     | G596         | NA    | R:2 V:1 S:1 D:1                     | 0.0065 | 5  | 4  | Level-3 | luad:2 mmyl:1 gbm:1 blca:1                            |
| CEP63    | S153         | NA    | L:5 S:4                             | 0.0068 | 9  | 5  | Level-1 | skcm:4 stad:2 prad:1 lihc:1 coadread:1                |
| PIK3CB   | D1067        | NA    | V:3 Y:1 A:1                         | 0.0068 | 5  | 5  | Level-1 | ucec:1 thca:1 skcm:1 hnc:1 gbm:1                      |
| ARHGAP33 | S964         | NA    | S:4                                 | 0.0069 | 4  | 2  | Level-1 | paad:3 stad:1                                         |
| KCNH5    | T147         | NA    | T:13                                | 0.0069 | 13 | 2  | Level-1 | skcm:1 1 csc:2                                        |
| DUSP16   | R483         | NA    | *:7                                 | 0.0069 | 7  | 4  | Level-1 | coadread:3 stad:2 ucec:1 brca:1                       |
| CDKN2A   | L130         | NA    | R:3 Q:2 V:1                         | 0.0070 | 6  | 3  | Level-1 | paad:3 csc:2 skcm:1                                   |
| FAM58A   | K141_splice  | NA    |                                     | 0.0071 | 4  | 3  | Level-1 | skcm:2 luad:1 brca:1                                  |
| C6       | K817         | NA    | T:5 R:1                             | 0.0071 | 6  | 3  | Level-1 | stad:3 coadread:2 ov:1                                |
| MED28    | G7           | NA    | G:3 C:1                             | 0.0073 | 4  | 2  | Level-1 | luad:3 hnc:1                                          |
| PROCR    | R98          | NA    | L:8                                 | 0.0075 | 8  | 7  | Level-1 | acc:2 prad:1 luad:1 kirp:1 kirc:1 csc:1 brca:1        |
| MARCH10  | G241         | NA    | E:4 R:1 G:1                         | 0.0078 | 6  | 2  | Level-1 | skcm:4 csc:2                                          |

|         |       |       |                     |        |    |   |         |                                              |
|---------|-------|-------|---------------------|--------|----|---|---------|----------------------------------------------|
| FZD10   | S22   | NA    | R:5                 | 0.0080 | 5  | 4 | Level-1 | acc:2 prad:1 luad:1 kirp:1                   |
| RTKN2   | R33   | NA    | *:8 Q:2             | 0.0080 | 10 | 6 | Level-1 | ucec:3 skcm:2 coadread:2 hns:1 gbm:1 brca:1  |
| EP300   | H1451 | NA    | R:1 P:1 L:1 H:1     | 0.0080 | 4  | 4 | Level-1 | ucec:1 lgg:1 brca:1 blca:1                   |
| ARID1A  | R693  | NA    | *:8                 | 0.0080 | 8  | 5 | Level-3 | ucec:4 stad:1 lgg:1 esca:1 coadread:1        |
| THSD7B  | E1181 | E1149 | K:9                 | 0.0081 | 9  | 1 | Level-1 | skcm:9                                       |
| THSD7B  | G557  | G526  | R:5 E:2 V:1         | 0.0081 | 8  | 4 | Level-1 | skcm:5 luad:1 lihc:1 gbm:1                   |
| SHROOM1 | P300  | NA    | T:4                 | 0.0081 | 4  | 3 | Level-1 | lihc:2 kirp:1 acc:1                          |
| NUP93   | Q15   | NA    | *:4                 | 0.0082 | 4  | 2 | Level-1 | thca:3 ucec:1                                |
| ERBB3   | M60   | NA    | K:3 R:1             | 0.0083 | 4  | 4 | Level-1 | ucec:1 esca:1 coadread:1 blca:1              |
| CLEC14A | R193  | NA    | C:5 H:3 R:2         | 0.0086 | 10 | 6 | Level-1 | skcm:3 paad:2 coadread:2 prad:1 luad:1 gbm:1 |
| EYA4    | L152  | NA    | R:2 L:2 V:1 P:1 H:1 | 0.0086 | 7  | 3 | Level-1 | ucec:3 stad:3 luad:1                         |
| CEP89   | S153  | NA    | G:3 I:1             | 0.0086 | 4  | 4 | Level-1 | lihc:1 kich:1 hns:1 acc:1                    |
| SHB     | A460  | NA    | T:4                 | 0.0087 | 4  | 2 | Level-1 | hns:2 gbm:2                                  |
| APOBR   | E361  | E352  | D:5                 | 0.0088 | 5  | 4 | Level-1 | brca:2 ucec:1 ov:1 csc:1                     |
| SF3B1   | D894  | NA    | N:2 G:2 A:1         | 0.0090 | 5  | 4 | Level-1 | mmyl:2 skcm:1 csc:1 cl:1                     |
| BRINP1  | G713  | NA    | G:9                 | 0.0090 | 9  | 1 | Level-1 | skcm:9                                       |
| RIPPLY2 | S110  | NA    | L:5 *:1             | 0.0090 | 6  | 3 | Level-1 | skcm:3 csc:2 hns:1                           |
| TCEB1   | Y79   | NA    | S:1 N:1 F:1 *:1     | 0.0090 | 4  | 1 | Level-3 | kirc:4                                       |
| KCNJ12  | E430  | NA    | G:5 *:1             | 0.0092 | 6  | 4 | Level-1 | brca:2 acc:2 lihc:1 coadread:1               |
| NAP1L3  | K502  | NA    | R:2 T:1 N:1 M:1 K:1 | 0.0093 | 6  | 4 | Level-1 | stad:3 esca:1 coadread:1 blca:1              |
| CYP7B1  | K332  | NA    | T:5                 | 0.0096 | 5  | 2 | Level-1 | stad:4 paad:1                                |
| HNMT    | L145  | NA    | L:4                 | 0.0096 | 4  | 4 | Level-1 | ucec:1 stad:1 lusc:1 lihc:1                  |
| NHS     | L215  | NA    | P:4                 | 0.0098 | 4  | 3 | Level-1 | brca:2 stad:1 cl:1                           |
| DHRS4   | T102  | NA    | M:6                 | 0.0098 | 6  | 5 | Level-1 | mbi:2 prad:1 paad:1 luad:1 kirc:1            |
| MAGI2   | L603  | NA    | R:3 P:2             | 0.0098 | 5  | 2 | Level-1 | stad:3 esca:2                                |

\* In few instances, our chosen canonical transcript was not the transcript used in previous literature. If an alternative transcript was previously used in literature, its respective annotation is included.

[a] Validate levels are described in Methods section of the main text.

Supplementary Table 3: Summary of presumptive false positive mutations

| Hugo Symbol | Codon       | Variant Amino Acid | Q-Value               | Mutation Count | Tumor Types                                                          | Reason Removed                                                  |
|-------------|-------------|--------------------|-----------------------|----------------|----------------------------------------------------------------------|-----------------------------------------------------------------|
| ABCD1       | S606        | P:4 S:1            | 0.000862640975571358  | 5              | cesc:2 skcm:1 kich:1 cli:1                                           | ALIGNABILITY                                                    |
| ABHD17A     | L6          | L:5                | 3.06946427965666e-05  | 5              | kirp:3 nbl:1 acc:1                                                   | MANUAL_REVIEW                                                   |
| ACD         | L51         | L:7 F:3            | 2.152438669742113e-09 | 10             | skcm:8 csc:2                                                         | HOMOPOLYMER                                                     |
| ACIN1       | E274        | E:6                | 0.000342954390340412  | 6              | lihc:4 kir:2                                                         | LOCAL_ENTROPY HOMOPOLYMER                                       |
| ACIN1       | E279        | E:5                | 0.00594950111736382   | 5              | lihc:4 kir:1                                                         | LOCAL_ENTROPY HOMOPOLYMER ALIGNABILITY                          |
| ACR         | W279        | C:5 R:1            | 9.30535996512287e-06  | 6              | kich:2 prad:1 paad:1 lihc:1 hncs:1                                   | MANUAL_REVIEW                                                   |
| ACRC        | S258        | N:5                | 0.00550691538933586   | 5              | paad:2 luad:1 hncs:1 esca:1                                          | ALIGNABILITY                                                    |
| ADAMTS7     | R581        | R:8                | 2.63766959399348e-09  | 8              | lihc:2 coadread:2 brca:2 kich:1 hgg:1                                | ALIGNABILITY                                                    |
| ADAMTS7     | P593        | P:3 S:2            | 0.000968138409409472  | 5              | gbc:2 kich:1 hncs:1 acc:1                                            | ALIGNABILITY                                                    |
| ADAMTS7     | H1024       | R:4                | 0.00415856750100998   | 4              | ucs:1 prad:1 lgg:1 hncs:1                                            | FP_RICH_GENE                                                    |
| ADAMTS7     | N1071       | S:13 N:5           | 7.83772201328159e-32  | 18             | luad:8 lgg:4 skcm:2 brca:2 lusc:1 hncs:1                             | SUBCLONAL_FRAC LOW_AF_FRAC ALIGNABILITY                         |
| ADAMTS7     | C1646       | C:7                | 0.00968186459635509   | 7              | hncs:2 skcm:1 prad:1 lusc:1 kirp:1 kir:1                             | FP_RICH_GENE                                                    |
| ADAMTS7     | I1660       | V:5 I:1            | 1.94865053660039e-05  | 6              | acc:4 skcm:1 nbl:1                                                   | FP_RICH_GENE                                                    |
| ADH1A       | E253        | E:12               | 1.18004870580809e-10  | 12             | lihc:9 acc:2 kich:1                                                  | LOW_AF_FRAC ALIGNABILITY                                        |
| ADRA2B      | E301        | E:8                | 3.06136380899144e-06  | 8              | coadread:7 kich:1                                                    | CENTER_BIAS LOCAL_ENTROPY HOMOPOLYMER                           |
| AGAP10      | S223        | I:7                | 1.22418809091434e-08  | 7              | paad:5 luad:1 esca:1                                                 | FP_RICH_GENE                                                    |
| AGAP10      | H228        | R:26               | 8.01349118908423e-59  | 26             | paad:9 prad:5 hncs:5 luad:3 skcm:2 lgg:1 kirp:1                      | FP_RICH_GENE                                                    |
| AGAP10      | M293        | V:4                | 0.000261874887087382  | 4              | skcm:4                                                               | ALIGNABILITY                                                    |
| AGAP6       | A82         | G:5                | 0.000429650462832401  | 5              | luad:2 prad:1 hncs:1 cesc:1                                          | FP_RICH_GENE                                                    |
| AGAP6       | S127        | I:6                | 6.93552179177447e-06  | 6              | paad:3 prad:2 gbm:1                                                  | ALIGNABILITY                                                    |
| AHNAK       | V1940       | A:6 M:1            | 3.29716414991958e-07  | 7              | paad:3 blca:2 skcm:1 luad:1                                          | LOW_AF_FRAC                                                     |
| ALG1        | E303        | E:6                | 9.94133809985523e-07  | 6              | luad:3 paad:1 lihc:1 gbm:1                                           | MANUAL_REVIEW                                                   |
| ALG13       | P932        | P:5                | 0.000158888438568623  | 5              | coadread:2 ucec:1 lihc:1 kir:1                                       | LOCAL_ENTROPY HOMOPOLYMER ALIGNABILITY                          |
| ALG1L       | L38         | L:4                | 0.000231487543571558  | 4              | skcm:1 luad:1 hncs:1 gbm:1                                           | MANUAL_REVIEW                                                   |
| AMIGO3      | P405        | P:4                | 0.00204751373793856   | 4              | acc:3 lihc:1                                                         | MANUAL_REVIEW                                                   |
| AMOT        | Q394        | Q:9                | 1.34333192531837e-09  | 9              | paad:6 luad:2 prad:1                                                 | HOMOPOLYMER ALIGNABILITY                                        |
| ANAPC1      | V224        | L:4                | 0.0054190881762113    | 4              | brca:2 paad:1 kich:1                                                 | ALIGNABILITY                                                    |
| ANAPC1      | T537        | A:22               | 1.21185620400836e-43  | 22             | paad:11 luad:3 skcm:2 prad:2 lusc:1 kich:1 gbm:1 esca:1              | SUBCLONAL_FRAC ALIGNABILITY                                     |
| ANKRD32     | T999        | N:12               | 3.13133104404885e-17  | 12             | skcm:3 luad:3 blca:2 prad:1 lgg:1 kirp:1 hncs:1                      | SUBCLONAL_FRAC LOW_AF_FRAC                                      |
| ANKRD36     | T998        | S:21               | 4.50612087453669e-41  | 21             | kir:5 gbm:5 paad:3 lihc:2 hncs:2 skcm:1 prad:1 luad:1 kirp:1         | SUBCLONAL_FRAC                                                  |
| ANKRD40     | D99         | E:7                | 4.84961165242621e-09  | 7              | stad:3 coadread:3 brca:1                                             | HOMOPOLYMER                                                     |
| APC         | Q1367       | *:11 E:1           | 7.16596369843585e-09  | 12             | coadread:12                                                          | CENTER_BIAS                                                     |
| APC         | E1397       | *:9                | 2.460762923729e-05    | 9              | coadread:9                                                           | CENTER_BIAS                                                     |
| AR          | L56         | Q:5                | 0.000216727939213306  | 5              | coadread:3 lihc:1 csc:1                                              | HOMOPOLYMER ALIGNABILITY                                        |
| AR          | L57         | Q:12               | 3.78882859431334e-17  | 12             | coadread:7 lihc:2 mbi:1 lusc:1 hncs:1                                | HOMOPOLYMER ALIGNABILITY                                        |
| AR          | Q58         | L:23               | 7.07045809186418e-41  | 23             | paad:5 luad:4 coadread:4 ucec:2 hncs:2 acc:2 stad:1 lihc:1 esca:1 bl | HOMOPOLYMER ALIGNABILITY                                        |
| AR          | Q59         | L:5                | 0.000216727939213306  | 5              | coadread:3 csc:1 acc:1                                               | HOMOPOLYMER ALIGNABILITY                                        |
| AR          | Q60         | L:5                | 0.000216727939213306  | 5              | csc:2 coadread:2 kirp:1                                              | HOMOPOLYMER ALIGNABILITY                                        |
| AR          | F814        | V:5                | 0.00117046661479441   | 5              | stad:3 esca:2                                                        | FP_RICH_GENE                                                    |
| ARRHGAP5    | V474        | A:15 I:1           | 2.92260123746261e-24  | 16             | coadread:10 kir:2 ov:1 lihc:1 kich:1 acc:1                           | SUBCLONAL_FRAC LOW_AF_FRAC                                      |
| ARID3B      | L354        | L:10               | 3.13674491877084e-17  | 10             | hncs:4 prad:2 paad:2 luad:2                                          | LOW_AF_FRAC                                                     |
| ARRB2       | P94         | P:13               | 2.35039102541776e-21  | 13             | paad:5 skcm:2 prad:2 luad:1 lgg:1 gbm:1 blca:1                       | LOCAL_ENTROPY                                                   |
| ASB2        | H515        | P:7                | 1.85354824659493e-08  | 7              | acc:5 paad:1 kirp:1                                                  | MANUAL_REVIEW                                                   |
| ASIC3       | G36         | G:6                | 6.29446489739486e-06  | 6              | acc:4 luad:1 lihc:1                                                  | MANUAL_REVIEW                                                   |
| ASIC3       | Y429        | Y:4                | 0.00177823717278513   | 4              | luad:3 skcm:1                                                        | MANUAL_REVIEW                                                   |
| ASPN        | E52         | D:7                | 9.87390970067584e-05  | 7              | lihc:4 kir:1 coadread:1 acc:1                                        | HOMOPOLYMER ALIGNABILITY                                        |
| ATN1        | Q492        | Q:13               | 1.04639878470522e-18  | 13             | lihc:5 coadread:4 acc:3 kich:1                                       | HOMOPOLYMER ALIGNABILITY                                        |
| ATN1        | Q494        | Q:6                | 9.96691224135993e-06  | 6              | acc:3 coadread:2 kich:1                                              | HOMOPOLYMER ALIGNABILITY                                        |
| ATN1        | Q498        | H:7                | 2.5002599176489e-07   | 7              | acc:4 coadread:3                                                     | HOMOPOLYMER                                                     |
| ATPAF2      | G21         | G:4 S:1            | 2.29809573189944e-05  | 5              | luad:1 kirp:1 hncs:1 blca:1 acc:1                                    | MANUAL_REVIEW                                                   |
| ATXN1       | Q207        | H:15               | 1.43017168850675e-18  | 15             | coadread:5 lihc:4 ucs:1 skcm:1 prad:1 luad:1 kich:1 hncs:1           | SUBCLONAL_FRAC HOMOPOLYMER ALIGNABILITY                         |
| ATXN1       | Q208        | H:8                | 3.8420365840793e-07   | 8              | coadread:7 kich:1                                                    | SUBCLONAL_FRAC LOW_AF_FRAC CENTER_BIAS HOMOPOLYMER ALIGNABILITY |
| ATXN1       | H209        | Q:5                | 0.00018163395899749   | 5              | coadread:5                                                           | SUBCLONAL_FRAC HOMOPOLYMER ALIGNABILITY                         |
| ATXN1       | Q210        | H:11               | 7.60007400513248e-12  | 11             | coadread:10 acc:1                                                    | SUBCLONAL_FRAC LOW_AF_FRAC CENTER_BIAS ALIGNABILITY             |
| ATXN1       | Q212        | H:6                | 0.000233469100979202  | 6              | coadread:4 skcm:1 acc:1                                              | SUBCLONAL_FRAC HOMOPOLYMER ALIGNABILITY                         |
| AZIN1       | S367        | G:10               | 2.56732615512135e-14  | 10             | lihc:10                                                              | LOW_AF_FRAC                                                     |
| BCLAF1      | E163        | K:10 D:1           | 0.000193839917525708  | 11             | skcm:7 csc:3 coadread:1                                              | SUBCLONAL_FRAC LOW_AF_FRAC LOCAL_ENTROPY                        |
| BMP2K       | Q460        | H:8                | 1.55944573818887e-09  | 8              | luad:4 prad:2 hncs:2                                                 | LOW_AF_FRAC HOMOPOLYMER ALIGNABILITY                            |
| BMP6        | Q118        | L:7                | 8.16812497656452e-09  | 7              | kirp:2 hncs:2 prad:1 paad:1 luad:1                                   | HOMOPOLYMER                                                     |
| BMS1        | E878        | D:12 A:1           | 1.76975421778267e-14  | 13             | kirp:10 lihc:2 ucec:1                                                | LOW_AF_FRAC ALIGNABILITY                                        |
| BMS1        | M1046       | I:7                | 4.4153909356419e-07   | 7              | paad:4 skcm:1 luad:1 hncs:1                                          | FP_RICH_GENE                                                    |
| BPTF        | A2676       | A:6                | 5.19259244108739e-07  | 6              | lihc:2 acc:2 kich:1 coadread:1                                       | MANUAL_REVIEW                                                   |
| C16orf3     | I52         | V:6 T:4 A:4        | 9.91491643867963e-19  | 14             | acc:7 kir:4 brca:2 kich:1                                            | MANUAL_REVIEW                                                   |
| C16orf3     | G65         | S:10               | 1.0335290988764e-07   | 10             | acc:4 cesc:2 lusc:1 kirp:1 kich:1 coadread:1                         | MANUAL_REVIEW                                                   |
| C17orf97    | P337        | P:3 T:2 L:1        | 0.00963715134568148   | 6              | brca:2 prad:1 kich:1 csc:1 blca:1                                    | SUBCLONAL_FRAC                                                  |
| C2orf81     | T315        | P:14               | 9.26671222691634e-28  | 14             | acc:13 kirp:1                                                        | MANUAL_REVIEW                                                   |
| CACNA1B     | T996        | A:6                | 1.06125745991242e-05  | 6              | coadread:6                                                           | CENTER_BIAS                                                     |
| CADM1       | T343        | T:33               | 6.40627138958796e-53  | 33             | paad:18 prad:2 lusc:2 lud:2 lgg:2 kirp:2 hncs:2 gbm:2 coadread:1     | LOCAL_ENTROPY HOMOPOLYMER                                       |
| CARM1       | A202        | V:13               | 5.47547362173106e-19  | 13             | paad:5 skcm:2 luad:2 hncs:2 gbm:2                                    | SUBCLONAL_FRAC LOW_AF_FRAC                                      |
| CBWD1       | Y161        | Y:4                | 0.000191005426084584  | 4              | brca:3 acc:1                                                         | SUBCLONAL_FRAC ALIGNABILITY                                     |
| CBWD1       | G144_splice |                    | 1.09440360227949e-08  | 8              | hncs:4 paad:2 luad:2                                                 | LOW_AF_FRAC ALIGNABILITY                                        |

|               |            |                 |                       |     |                                                                          |                                         |
|---------------|------------|-----------------|-----------------------|-----|--------------------------------------------------------------------------|-----------------------------------------|
| CBWD3         | Y161       | Y:5             | 0.000118041556159375  | 5   | paad:5                                                                   | MANUAL_REVIEW                           |
| CDC66         | S606       | P:6             | 5.16902597403749e-08  | 6   | lihc:5 csc:1                                                             | MANUAL_REVIEW                           |
| CD207         | E25_splice |                 | 0.000643501207521049  | 5   | lihc:5                                                                   | MANUAL_REVIEW                           |
| CD209         | R129       | W:10 Q:10 R:1   | 1.16246181745131e-17  | 21  | paad:8 prad:4 luad:3 blca:3 gg:2 skcm:1                                  | SUBCLONAL_FRAC LOW_AF_FRAC ALIGNABILITY |
| CDC25A        | R446       | *:4             | 0.000376180185581917  | 4   | ucec:2 stad:1 coadread:1                                                 | HOMOPOLYMER                             |
| CDC27         | V201       | I:6 F:5         | 1.8948843614927e-11   | 11  | lihc:10 kich:1                                                           | FP_RICH_GENE                            |
| CDC27         | P242       | S:7 P:1         | 1.5688518177157e-06   | 8   | lihc:2 csc:2 skcm:1 kich:1 gbc:1 brca:1                                  | SUBCLONAL_FRAC                          |
| CDC27         | S252       | T:4 F:2         | 0.00196573342020406   | 6   | skcm:2 lihc:1 kich:1 coadread:1 acc:1                                    | SUBCLONAL_FRAC                          |
| CDC27         | G265       | D:7             | 4.92156408609922e-05  | 7   | lihc:3 kich:1 gbc:1 csc:1 acc:1                                          | ALIGNABILITY                            |
| CDC27         | A274       | D:6             | 0.000881933145870572  | 6   | csc:2 coadread:2 kich:1 acc:1                                            | SUBCLONAL_FRAC ALIGNABILITY             |
| CDC27         | I493       | V:5             | 0.00211573665198745   | 5   | ucec:2 kich:1 coadread:1 brca:1                                          | FP_RICH_GENE                            |
| CDC7          | L28        | *:8             | 1.20647952214534e-11  | 8   | prad:3 skcm:2 luad:1 lihc:1 gg:1                                         | SUBCLONAL_FRAC LOW_AF_FRAC              |
| CDHR5         | S567       | G:6             | 3.37901272466812e-08  | 6   | lihc:5 gg:1                                                              | MANUAL_REVIEW                           |
| CDK11B        | D643       | E:7             | 2.51028195608217e-11  | 7   | mbl:1 lusc:1 lihc:1 kirc:1 esca:1 oll:1 brca:1                           | MANUAL_REVIEW                           |
| CDK5RAP3      | E251       | E:13            | 8.15667248622865e-21  | 13  | acc:4 lihc:3 prad:2 ucec:1 stad:1 kich:1 brca:1                          | SUBCLONAL_FRAC                          |
| CEACAM6       | T100       | I:5             | 0.00248376270024238   | 5   | lihc:3 kich:2                                                            | ALIGNABILITY                            |
| CEP170B       | S1513      | S:10            | 7.6792464557519e-17   | 10  | prad:2 luad:2 hncs:2 mrt:1 gg:1 kirc:1 blca:1                            | MANUAL_REVIEW                           |
| CG7           | T18        | A:5             | 4.30295252489488e-06  | 5   | paad:2 blca:2 skcm:1                                                     | MANUAL_REVIEW                           |
| CH17-132F21.1 | P115       | T:1 P:1 L:1 H:1 | 0.00907380059588514   | 4   | luad:2 skcm:1 hncs:1                                                     | SUBCLONAL_FRAC ALIGNABILITY             |
| CHEK2         | S415       | S:10 P:1        | 1.56771951445335e-204 | 101 | luad:28 paad:21 hncs:12 gg:10 coadread:8 prad:7 lihc:4 gbc:3 blca:3      | SUBCLONAL_FRAC LOW_AF_FRAC ALIGNABILITY |
| CHEK2         | K416       | E:110           | 1.81764718443644e-277 | 110 | luad:32 paad:20 hncs:14 gg:11 prad:6 coadread:6 skcm:4 lihc:4 kirc:1     | SUBCLONAL_FRAC LOW_AF_FRAC ALIGNABILITY |
| CHERP         | Q336       | Q:7             | 2.46967811236186e-08  | 7   | kirc:2 prad:1 lusc:1 luad:1 gg:1 hncs:1                                  | HOMOPOLYMER ALIGNABILITY                |
| CHIT1         | A359       | G:10            | 8.14456039568572e-11  | 10  | lihc:5 coadread:3 blca:1 acc:1                                           | MANUAL_REVIEW                           |
| CHRD          | V666       | G:6             | 3.16321693743309e-06  | 6   | paad:4 lihc:1 gbc:1                                                      | MANUAL_REVIEW                           |
| CLDN7         | S172       | A:7             | 4.81444898083864e-10  | 7   | luad:2 kirc:2 skcm:1 prad:1 hncs:1                                       | MANUAL_REVIEW                           |
| CLIP1         | E1012      | K:17            | 5.05606771244158e-19  | 17  | skcm:9 blca:4 luad:3 kirc:1                                              | SUBCLONAL_FRAC LOW_AF_FRAC              |
| CNTNAP3B      | V456       | V:7             | 1.17071227533758e-09  | 7   | paad:2 prad:1 luad:1 lihc:1 gg:1 kich:1                                  | ALIGNABILITY                            |
| CNTNAP3B      | M1247      | I:14            | 4.26175091558198e-22  | 14  | luad:5 hncs:4 prad:2 skcm:1 gg:1 gbc:1                                   | FP_RICH_GENE                            |
| COO9          | P112       | S:7 L:1         | 3.86419729823514e-08  | 8   | skcm:2 prad:1 paad:1 lusc:1 luad:1 hncs:1 csc:1                          | SUBCLONAL_FRAC                          |
| COTL1         | *143       | Y:6             | 1.05360474267408e-06  | 6   | paad:5 skcm:1                                                            | LOCAL_ENTROPY                           |
| CR1           | R2194      | *:16            | 7.96207052174728e-14  | 16  | paad:6 luad:3 prad:1 mbl:1 lusc:1 lihc:1 gg:1 kich:1 acc:1               | MANUAL_REVIEW                           |
| CR1           | M2208      | T:5 I:1         | 2.99719432660389e-05  | 6   | kich:2 acc:2 skcm:1 luad:1                                               | MANUAL_REVIEW                           |
| CR1           | E2220      | *:11 D:1        | 3.6482467633979e-11   | 12  | lihc:5 stad:2 paad:2 luad:1 kich:1 hncs:1                                | MANUAL_REVIEW                           |
| CRIPAK        | N9         | H:4             | 0.00834821390213213   | 4   | lihc:1 coadread:1 brca:1 acc:1                                           | FP_RICH_GENE                            |
| CRIPAK        | C143       | R:11 C:1        | 7.84749381998121e-12  | 12  | acc:9 coadread:2 luad:1                                                  | FP_RICH_GENE                            |
| CRIPAK        | P152       | P:22            | 6.36638127304443e-25  | 22  | acc:20 coadread:2                                                        | FP_RICH_GENE                            |
| CRIPAK        | M153       | T:6             | 6.57017583143448e-05  | 6   | coadread:6                                                               | FP_RICH_GENE                            |
| CRIPAK        | V164       | A:6 V:1         | 1.25721072274344e-05  | 7   | acc:2 stad:1 ov:1 lusc:1 coadread:1 brca:1                               | FP_RICH_GENE                            |
| CRIPAK        | P173       | R:10 P:1        | 3.39802080210222e-09  | 11  | acc:5 coadread:4 gg:1 hncs:1                                             | SUBCLONAL_FRAC                          |
| CRIPAK        | C174       | R:11            | 1.62110996792261e-12  | 11  | acc:7 coadread:3 gg:1                                                    | SUBCLONAL_FRAC                          |
| CRIPAK        | I190       | L:5             | 0.000770120387063095  | 5   | acc:5                                                                    | FP_RICH_GENE                            |
| CRIPAK        | D225       | D:17            | 3.63736179242521e-23  | 17  | acc:14 coadread:3                                                        | FP_RICH_GENE                            |
| CS            | Q187       | R:8             | 7.67485025768129e-12  | 8   | gbc:4 prad:2 kirc:1 brca:1                                               | MANUAL_REVIEW                           |
| CSGALNACT2    | L362       | F:14            | 2.8565748288377e-12   | 14  | kirc:5 acc:5 lihc:2 luad:1 kich:1                                        | LOW_AF_FRAC                             |
| CSNK2A1       | H236       | R:10            | 1.54783617082183e-13  | 10  | luad:3 skcm:1 prad:1 paad:1 mbl:1 lusc:1 gg:1 hncs:1                     | SUBCLONAL_FRAC LOW_AF_FRAC              |
| CSPG4         | R450       | W:4             | 0.00290676659077224   | 4   | paad:1 lihc:1 lam:1 csc:1                                                | ALIGNABILITY                            |
| CST1          | L117       | L:12            | 4.30849615815151e-13  | 12  | kirc:3 acc:3 prad:1 luad:1 lihc:1 kich:1 hncs:1 coadread:1               | LOW_AF_FRAC ALIGNABILITY                |
| CTAGE1        | F739       | F:7 S:1         | 0.00166925486982516   | 8   | skcm:6 stad:1 csc:1                                                      | LOCAL_ENTROPY                           |
| CTBP2         | G813       | G:8             | 0.000176768817338725  | 8   | paad:3 lusc:1 prad:1 luad:1 hncs:1 brca:1                                | LOW_AF_FRAC                             |
| CTBP2         | Q823       | Q:4 L:1         | 7.65325787728227e-05  | 5   | paad:2 prad:1 hncs:1 brca:1                                              | FP_RICH_GENE                            |
| CYP2B6        | K262       | R:6 K:1         | 5.17075817287792e-07  | 7   | lihc:6 csc:1                                                             | MANUAL_REVIEW                           |
| DAXX          | E451       | E:7             | 1.46316581495402e-05  | 7   | paad:4 stad:1 prad:1 gg:1                                                | LOCAL_ENTROPY ALIGNABILITY              |
| DCP1B         | Q252       | H:40            | 2.17470634805893e-85  | 40  | paad:17 luad:8 hncs:5 gg:3 ucec:2 coadread:2 skcm:1 kirc:1 blca:1        | HOMOPOLYMER                             |
| DDX11         | R167       | T:22            | 3.21807427353427e-26  | 22  | skcm:9 paad:3 lusc:2 prad:1 mbl:1 luad:1 kirc:1 kich:1 coadread:1 brca:1 | LOCAL_ENTROPY ALIGNABILITY              |
| DDX11         | R308       | R:6 M:1         | 2.26750423002148e-08  | 7   | lihc:2 luad:1 kirc:1 csc:1 brca:1 blca:1                                 | LOCAL_ENTROPY HOMOPOLYMER ALIGNABILITY  |
| DDX39B        | V145       | G:4             | 0.00891443792525387   | 4   | npc:1 luad:1 hncs:1 gbc:1                                                | LOCAL_ENTROPY                           |
| DENND4B       | Q900       | Q:15            | 1.32175531530385e-22  | 15  | paad:7 prad:3 gg:2 luad:1 hncs:1 blca:1                                  | HOMOPOLYMER                             |
| DENND4B       | Q902       | Q:10            | 9.9604022107974e-13   | 10  | paad:4 skcm:2 prad:1 luad:1 lihc:1 blca:1                                | HOMOPOLYMER ALIGNABILITY                |
| DENND4B       | Q904       | Q:16            | 2.0833335062361e-24   | 16  | lihc:5 coadread:4 kirc:2 kich:2 stad:1 kirc:1 acc:1                      | SUBCLONAL_FRAC HOMOPOLYMER ALIGNABILITY |
| DENND4B       | Q908       | E:9             | 8.50558249502982e-12  | 9   | lihc:5 coadread:2 kirc:1 acc:1                                           | SUBCLONAL_FRAC HOMOPOLYMER ALIGNABILITY |
| DHX9          | V40        | G:13            | 4.10676898380718e-21  | 13  | lusc:3 luad:3 skcm:1 paad:1 mbl:1 kirc:1 kirc:1 hncs:1 blca:1            | SUBCLONAL_FRAC                          |
| DKFZP761J1410 | A186       | S:8             | 2.47641732445476e-09  | 8   | acc:6 stad:1 lihc:1                                                      | MANUAL_REVIEW                           |
| DL1C1         | S741       | T:10            | 1.00079966543694e-09  | 10  | thca:2 prad:2 blca:2 lusc:1 skcm:1 luad:1 gg:1                           | SUBCLONAL_FRAC LOW_AF_FRAC HOMOPOLYMER  |
| DOCK3         | H1979      | P:4 H:1         | 0.00305718543648408   | 5   | skcm:1 prad:1 paad:1 luad:1 gg:1                                         | LOCAL_ENTROPY                           |
| DOK7          | P317       | P:4             | 0.00134494548278983   | 4   | acc:3 kirc:1                                                             | MANUAL_REVIEW                           |
| DPYS          | R391       | G:4 R:1         | 0.0044921328037224    | 5   | stad:3 luad:1 esca:1                                                     | LOCAL_ENTROPY                           |
| DTX1          | D122       | E:15            | 2.66006082794545e-23  | 15  | luad:5 hncs:5 skcm:3 prad:1 gbc:1                                        | SUBCLONAL_FRAC LOW_AF_FRAC              |
| DYNC112       | D443       | D:7 N:1         | 1.38117693238285e-10  | 8   | lihc:2 csc:2 acc:2 luad:1 brca:1                                         | MANUAL_REVIEW                           |
| DYRK1B        | P601       | P:5 L:1         | 1.27819136676662e-06  | 6   | paad:2 luad:2 csc:1 blca:1                                               | MANUAL_REVIEW                           |
| EBPL          | L189       | V:16            | 5.82229565652303e-23  | 16  | acc:4 lihc:3 paad:2 kirc:2 kich:2 kirc:1 gbc:1 csc:1                     | LOW_AF_FRAC                             |
| EDC4          | S624       | S:4             | 0.00795466526940708   | 4   | paad:2 kirc:1 brca:1                                                     | HOMOPOLYMER                             |
| EDC4          | H1346      | N:4             | 0.00795466526940708   | 4   | brca:2 kirc:1 acc:1                                                      | FP_RICH_GENE                            |
| EEF1A1        | P359       | P:9 S:1         | 6.91000846501129e-13  | 10  | lihc:3 brca:3 acc:2 skcm:1 csc:1                                         | SUBCLONAL_FRAC                          |
| EEF1A1        | T432       | I:4 S:3 L:3 A:1 | 7.61038320326541e-14  | 11  | lihc:8 hncs:2 gbc:1                                                      | FP_RICH_GENE                            |



|           |             |             |                       |    |                                                                   |                                                       |
|-----------|-------------|-------------|-----------------------|----|-------------------------------------------------------------------|-------------------------------------------------------|
| GAGE2A    | Q59         | E:4         | 0.000275951761957974  | 4  | luad:2 ucs:1 hns:1                                                | ALIGNABILITY                                          |
| GATSL3    | L307_splice |             | 9.77746034351299e-15  | 9  | coadread:7 lh:2                                                   | MANUAL_REVIEW                                         |
| GGT1      | T117        | S:7 I:1     | 3.17661197496979e-09  | 8  | skcm:2 paad:2 lgg:2 ucs:1 csc:1                                   | SUBCLONAL_FRAC ALIGNABILITY                           |
| GGTLC1    | M31         | T:17        | 4.69040773863925e-27  | 17 | paad:7 luad:3 lgg:3 ucs:1 prad:1 hns:1 esca:1                     | LOW_AF_FRAC                                           |
| GOLGA6L10 | A469        | A:7         | 0.000551056455088434  | 7  | kir:4 skcm:2 prad:1                                               | ALIGNABILITY                                          |
| GOLGA6L19 | E151        | Q:10        | 2.66261804133171e-10  | 10 | gbm:3 kir:2 skcm:1 paad:1 mb:1 lgg:1 hns:1                        | FP_RICH_GENE                                          |
| GOLGA6L19 | V159        | V:15        | 5.78400500403376e-30  | 15 | kir:4 gbm:4 prad:2 lgg:2 hns:2 lbc:1                              | ALIGNABILITY                                          |
| GOLT1A    | R62         | R:5 W:2     | 0.000145213154008471  | 7  | paad:5 luad:1 gbm:1                                               | MANUAL_REVIEW                                         |
| GON4L     | E1528       | E:8         | 2.64335750024195e-07  | 8  | acc:3 lh:2 kir:2 kic:1                                            | LOCAL_ENTROPY HOMOPOLYMER                             |
| GOT2      | R355        | W:10 G:1    | 1.18568199740076e-07  | 11 | paad:4 prad:2 luad:2 uce:1 lgg:1 hns:1                            | LOW_AF_FRAC                                           |
| GPATCH4   | F362        | V:10        | 1.36742843101846e-15  | 10 | lh:10                                                             | LOW_AF_FRAC                                           |
| GPRIN1    | E233        | V:11        | 2.1475692112216e-19   | 11 | coadread:8 kir:2 blca:1                                           | FP_RICH_GENE                                          |
| GPRIN1    | G236        | V:8         | 6.01356021952172e-08  | 8  | coadread:6 kir:2                                                  | CENTER_BIAS                                           |
| GPSM2     | S524        | T:4 F:1     | 0.000409899027000259  | 5  | lh:4 csc:1                                                        | HOMOPOLYMER                                           |
| GPX1      | I42         | I:7         | 0.00612132027357632   | 7  | paad:3 luad:2 acc:2                                               | FP_RICH_GENE                                          |
| GPX1      | P77         | R:33        | 4.25521325912642e-50  | 33 | paad:14 skcm:6 lh:5 hns:2 acc:2 prad:1 luad:1 lgg:1 kic:1         | SUBCLONAL_FRAC ALIGNABILITY                           |
| GSN       | R48_splice  |             | 2.74180282743168e-14  | 9  | paad:5 skcm:2 stad:1 gbm:1                                        | MANUAL_REVIEW                                         |
| GTF2IRD2  | K491        | K:6         | 3.301622118585559e-07 | 6  | stad:2 thca:1 lgg:1 kir:1 dlbc:1                                  | ALIGNABILITY                                          |
| GTF3C3    | E103        | E:37 D:1    | 1.19651924034416e-69  | 38 | paad:20 lh:6 hns:5 luad:4 uce:2 lgg:1                             | LOCAL_ENTROPY HOMOPOLYMER ALIGNABILITY                |
| HDLBP     | G748        | D:7         | 3.27079605730584e-06  | 7  | paad:3 luad:2 lh:1 esca:1                                         | LOW_AF_FRAC                                           |
| HEG1      | S671        | S:5         | 0.000500737714098013  | 5  | lh:2 coadread:1 csc:1 brca:1                                      | LOCAL_ENTROPY HOMOPOLYMER ALIGNABILITY                |
| HGFAC     | L23         | L:6         | 0.00497599119764775   | 6  | thca:2 prad:2 stad:1 luad:1                                       | SUBCLONAL_FRAC LOCAL_ENTROPY HOMOPOLYMER              |
| HLA-A     | V49         | V:30        | 2.66577548724559e-42  | 30 | hns:9 paad:7 luad:5 lh:3 skcm:1 prad:1 lgg:1 kir:1 kic:1 coadrea  | SUBCLONAL_FRAC                                        |
| HLA-A     | D54         | D:9         | 4.79682190905088e-09  | 9  | brca:3 kir:2 paad:1 kic:1 coadread:1 acc:1                        | FP_RICH_GENE                                          |
| HLA-A     | Q78         | R:38 *:2    | 9.73225512555188e-77  | 40 | hns:10 paad:7 luad:5 prad:4 lgg:4 skcm:3 blca:3 acc:2 uce:1 coadr | FP_RICH_GENE                                          |
| HLA-DQB2  | A167        | T:5 A:1     | 0.000284307716523346  | 6  | kic:2 skcm:1 prad:1 paad:1 kir:1                                  | SUBCLONAL_FRAC                                        |
| HMBG1     | E210        | D:6         | 7.23409810504073e-07  | 6  | paad:3 luad:1 kir:1 brca:1                                        | LOCAL_ENTROPY HOMOPOLYMER ALIGNABILITY                |
| HMBG3     | E192        | E:43        | 1.14167698921037e-75  | 43 | paad:22 prad:5 luad:5 hns:3 lgg:2 coadread:2 ucs:1 skcm:1 lh:1 g  | LOCAL_ENTROPY HOMOPOLYMER ALIGNABILITY                |
| HNRNPLC1  | Q262        | R:7         | 4.68096154299682e-11  | 7  | lh:7                                                              | ALIGNABILITY                                          |
| HNRNPL    | P367        | P:7         | 9.89572249477293e-09  | 7  | skcm:2 gbm:2 mb:1 luad:1 hns:1                                    | LOCAL_ENTROPY                                         |
| HNRNPM    | R112_splice |             | 5.21297796856317e-14  | 10 | kir:10                                                            | LOW_AF_FRAC                                           |
| HOMEZ     | E531        | E:6         | 0.00039130124471286   | 6  | lh:5 kic:1                                                        | LOCAL_ENTROPY HOMOPOLYMER                             |
| HOMEZ     | E536        | E:5         | 0.00661260688189214   | 5  | coadread:4 csc:1                                                  | LOCAL_ENTROPY HOMOPOLYMER ALIGNABILITY                |
| HOMEZ     | D538        | E:10        | 1.48861119548929e-14  | 10 | coadread:9 kic:1                                                  | LOCAL_ENTROPY HOMOPOLYMER ALIGNABILITY                |
| HPS4      | A632        | D:6         | 0.000117912657875887  | 6  | lh:3 brca:2 kir:1                                                 | MANUAL_REVIEW                                         |
| HRC       | E193        | E:14        | 1.08742750476841e-19  | 14 | lh:8 coadread:3 acc:2 kic:1                                       | SUBCLONAL_FRAC LOCAL_ENTROPY                          |
| HRC       | E202        | E:13        | 5.18788423757866e-18  | 13 | lh:6 coadread:6 acc:1                                             | SUBCLONAL_FRAC LOW_AF_FRAC LOCAL_ENTROPY ALIGNABILITY |
| HRC       | E203        | E:6         | 0.00135452677159996   | 6  | lh:4 coadread:2                                                   | LOCAL_ENTROPY ALIGNABILITY                            |
| HRC       | D248        | D:9         | 1.02757598330532e-11  | 9  | acc:4 coadread:3 lh:2                                             | SUBCLONAL_FRAC                                        |
| HRCT1     | H92         | P:14        | 3.59608899663597e-25  | 14 | paad:3 hns:3 prad:2 luad:2 blca:2 skcm:1 kir:1                    | LOCAL_ENTROPY HOMOPOLYMER                             |
| HS6S11    | D87         | E:7         | 0.00579192140128345   | 7  | brca:6 ces:1                                                      | MANUAL_REVIEW                                         |
| HS6S11    | L184        | P:5         | 1.54688776506051e-05  | 5  | lgg:3 paad:1 luad:1                                               | MANUAL_REVIEW                                         |
| HS6S11    | R185        | *:9 Q:1     | 1.27486678273365e-05  | 10 | paad:5 skcm:1 prad:1 luad:1 hns:1 coadread:1                      | MANUAL_REVIEW                                         |
| HSD17B7   | S173        | N:12        | 2.42234853054625e-17  | 12 | paad:10 luad:1 esca:1                                             | ALIGNABILITY                                          |
| HTRA3     | Q403        | R:6         | 4.79251151552193e-08  | 6  | skcm:2 gbm:2 hns:1 blca:1                                         | SUBCLONAL_FRAC                                        |
| HYDIN     | I1077       | V:11        | 2.77554785109129e-15  | 11 | paad:3 luad:3 prad:1 uce:1 lh:1 hns:1 blca:1                      | MANUAL_REVIEW                                         |
| IBA57     | S130        | R:10        | 5.03765883084274e-13  | 10 | acc:5 skcm:1 prad:1 mb:1 kir:1 blca:1                             | MANUAL_REVIEW                                         |
| IDUA      | T374        | P:14        | 1.47172606275733e-28  | 14 | acc:12 kir:1 hns:1                                                | MANUAL_REVIEW                                         |
| IFITM3    | P55         | P:31        | 2.13300488492628e-33  | 31 | coadread:14 lh:11 paad:2 uce:1 prad:1 luad:1 acc:1                | LOW_AF_FRAC                                           |
| IFITM3    | P70         | T:24        | 4.8122003777941e-32   | 24 | lh:7 paad:4 coadread:4 skcm:3 gbm:2 prad:1 luad:1 lgg:1 kic:1     | SUBCLONAL_FRAC LOW_AF_FRAC                            |
| IL17RC    | G405        | G:4         | 0.00106932220315046   | 4  | prad:1 luad:1 lh:1 kir:1                                          | MANUAL_REVIEW                                         |
| IRF2BPL   | Q114        | Q:6         | 7.99750147409122e-08  | 6  | kir:3 coadread:2 kic:1                                            | HOMOPOLYMER ALIGNABILITY                              |
| IRS1      | P1203       | P:4         | 0.00571664771457703   | 4  | prad:1 paad:1 luad:1 gbm:1                                        | LOCAL_ENTROPY                                         |
| IRS1      | P1205       | P:3 A:2     | 0.00273647596383517   | 5  | stad:1 luad:1 kic:1 coadread:1 acc:1                              | LOCAL_ENTROPY                                         |
| ITGA11    | C668        | F:4 C:1     | 0.00199366797445897   | 5  | uce:1 prad:1 luad:1 lgg:1 blca:1                                  | SUBCLONAL_FRAC                                        |
| JMY       | P822        | T:7         | 7.27062927348962e-08  | 7  | kir:3 skcm:2 paad:2                                               | LOCAL_ENTROPY HOMOPOLYMER                             |
| KANK1     | E1035       | E:14        | 1.82253175732435e-18  | 14 | paad:3 lh:3 prad:2 luad:2 uce:1 lgg:1 kir:1 hns:1                 | LOW_AF_FRAC LOCAL_ENTROPY HOMOPOLYMER                 |
| KAT6A     | P1693       | P:35        | 4.23837374520791e-75  | 35 | paad:18 lgg:8 luad:4 skcm:2 stad:1 brca:1 blca:1                  | LOCAL_ENTROPY                                         |
| KBTBD6    | T403        | K:15 T:1    | 7.84390591932067e-25  | 16 | paad:8 prad:3 luad:3 uce:1 blca:1                                 | LOW_AF_FRAC                                           |
| KCNN3     | L66         | H:17 L:15   | 4.33694167598225e-62  | 32 | brca:17 coadread:14 uce:1                                         | HOMOPOLYMER                                           |
| KIAA0040  | K73         | E:5         | 3.10542034139202e-06  | 5  | coadread:5                                                        | SUBCLONAL_FRAC LOCAL_ENTROPY ALIGNABILITY             |
| KIAA0040  | D76         | N:5 E:3     | 3.10542034139202e-06  | 8  | lh:5 coadread:3                                                   | SUBCLONAL_FRAC LOCAL_ENTROPY ALIGNABILITY             |
| KIAA0754  | T964        | P:4         | 0.00285473662398387   | 4  | luad:2 prad:1 blca:1                                              | ALIGNABILITY                                          |
| KIAA0754  | T969        | A:6         | 7.19355256681467e-07  | 6  | prad:2 paad:2 luad:1 lh:1                                         | ALIGNABILITY                                          |
| KIAA0907  | Q444        | P:7         | 2.39517033841913e-09  | 7  | paad:3 lgg:1 kir:1 hns:1 gbm:1                                    | LOCAL_ENTROPY                                         |
| KIAA0907  | Q446        | P:24        | 4.0248996053485e-49   | 24 | paad:9 skcm:5 luad:5 blca:2 prad:1 lgg:1 hns:1                    | SUBCLONAL_FRAC LOCAL_ENTROPY                          |
| KIAA2018  | Q1470       | Q:10        | 1.25678284071287e-11  | 10 | coadread:7 lh:1 csc:1 acc:1                                       | LOW_AF_FRAC HOMOPOLYMER ALIGNABILITY                  |
| KIF1A     | E917        | D:14        | 5.57489062158891e-17  | 14 | coadread:5 acc:5 kir:3 csc:1                                      | LOW_AF_FRAC LOCAL_ENTROPY HOMOPOLYMER ALIGNABILITY    |
| KIF21A    | E615        | E:5 D:1     | 0.00348783200432334   | 6  | paad:4 uce:1 kic:1                                                | LOCAL_ENTROPY HOMOPOLYMER                             |
| KIF25     | W3          | R:9 C:1 *:1 | 5.37256075037827e-13  | 11 | luad:4 prad:3 ov:1 lgg:1 csc:1 coadread:1                         | SUBCLONAL_FRAC LOW_AF_FRAC ALIGNABILITY               |
| KIR2DL4   | L306        | L:4         | 0.00225404500890114   | 4  | brca:4                                                            | MANUAL_REVIEW                                         |
| KMT2C     | T316        | S:4 T:3 I:1 | 7.10131458426957e-06  | 8  | skcm:4 paad:1 luad:1 lh:1 hns:1                                   | SUBCLONAL_FRAC LOW_AF_FRAC                            |
| KMT2C     | V346        | V:5         | 0.00494703907890027   | 5  | lh:3 gbc:1 acc:1                                                  | FP_RICH_GENE                                          |
| KMT2C     | H367        | Y:3 H:2 D:2 | 0.00350512435695452   | 7  | skcm:2 brca:2 stad:1 luad:1 lh:1                                  | LOW_AF_FRAC                                           |

|           |       |             |                       |    |                                                                       |                                                       |
|-----------|-------|-------------|-----------------------|----|-----------------------------------------------------------------------|-------------------------------------------------------|
| KMT2C     | C1103 | *:5         | 0.00494703907890027   | 5  | paad:2 lhc:2 kirp:1                                                   | ALIGNABILITY                                          |
| KNDC1     | V806  | D:9         | 2.231074760491e-12    | 9  | acc:9                                                                 | MANUAL_REVIEW                                         |
| KRT1      | S557  | G:6         | 7.63002582603397e-06  | 6  | coadread:4 csc:1 cesc:1                                               | MANUAL_REVIEW                                         |
| KRT14     | G97   | G:4         | 0.0097459066327769    | 4  | lud:2 skcm:1 prad:1                                                   | MANUAL_REVIEW                                         |
| KRT6B     | L291  | L:4 V:1 I:1 | 0.00295795263642027   | 6  | lud:3 prad:1 kich:1 coadread:1                                        | ALIGNABILITY                                          |
| KRT8      | R51   | C:9         | 1.29144435315386e-06  | 9  | lhc:5 prad:3 lud:1                                                    | ALIGNABILITY                                          |
| KRT8      | S59   | A:31        | 2.64704318997344e-75  | 31 | lhc:15 acc:8 kirp:5 skcm:1 prad:1 brca:1                              | FP_RICH_GENE                                          |
| KRTAP1-1  | Y86   | C:8         | 1.24831838365853e-11  | 8  | paad:5 kirp:2 blca:1                                                  | MANUAL_REVIEW                                         |
| KRTAP1-5  | I88   | T:22        | 2.22402480447081e-47  | 22 | hncs:11 prad:6 skcm:3 mbl:1 kirc:1                                    | LOW_AF_FRAC                                           |
| KRTAP4-6  | R47   | R:4 K:2     | 0.00653383396287568   | 6  | lud:3 skcm:2 kirp:1                                                   | LOW_AF_FRAC ALIGNABILITY                              |
| KRTAP4-6  | T103  | T:6         | 0.000232934159088728  | 6  | coadread:3 skcm:2 prad:1                                              | SUBCLONAL_FRAC                                        |
| KRTAP4-6  | R106  | R:7 C:1     | 8.18766790461789e-06  | 8  | coadread:4 acc:2 lhc:1 esca:1                                         | SUBCLONAL_FRAC LOW_AF_FRAC                            |
| KRTAP4-6  | S110  | C:7         | 1.59229484079978e-06  | 7  | coadread:3 acc:2 lhc:1 acyc:1                                         | SUBCLONAL_FRAC                                        |
| KRTAP4-6  | S127  | P:5         | 0.00151295711208573   | 5  | coadread:2 skcm:1 lud:1 lgg:1                                         | FP_RICH_GENE                                          |
| KRTAP4-6  | S153  | Y:15        | 1.11404126547909e-08  | 15 | paad:6 prad:3 lud:3 ucs:1 skcm:1 hncs:1                               | SUBCLONAL_FRAC                                        |
| KRTAP4-6  | I191  | I:28        | 1.54724382855415e-43  | 28 | paad:7 hncs:7 lud:6 skcm:5 ucs:1 prad:1 cesc:1                        | FP_RICH_GENE                                          |
| KRTAP4-6  | C194  | C:5 W:1     | 0.00275683869346171   | 6  | skcm:4 paad:2                                                         | FP_RICH_GENE                                          |
| KRTAP4-6  | R196  | R:7         | 4.3773225057267e-06   | 7  | skcm:4 paad:2 prad:1                                                  | ALIGNABILITY                                          |
| KRTAP5-10 | G95   | G:5         | 0.00833938756559616   | 5  | paad:3 ucs:1 hncs:1                                                   | FP_RICH_GENE                                          |
| KRTAP5-10 | G105  | G:8 D:1     | 6.04260974587503e-09  | 9  | blca:5 brca:2 lud:1 gbc:1                                             | LOCAL_ENTROPY                                         |
| KRTAP5-4  | V92   | G:4         | 0.00047422732231037   | 4  | paad:3 kich:1                                                         | MANUAL_REVIEW                                         |
| KRTAP5-8  | C153  | S:7         | 2.66558171364567e-09  | 7  | paad:3 ucec:1 lud:1 lgg:1 kirc:1                                      | LOW_AF_FRAC HOMOPOLYMER                               |
| KRTAP9-1  | P151  | P:4         | 0.00615329197347948   | 4  | lhc:2 kirp:1 acc:1                                                    | FP_RICH_GENE                                          |
| KRTAP9-1  | C153  | S:12        | 5.06984580042805e-22  | 12 | coadread:11 acc:1                                                     | SUBCLONAL_FRAC LOW_AF_FRAC CENTER_BIAS                |
| LAMA5     | L2223 | R:7         | 2.07279723911222e-09  | 7  | kirp:3 acc:2 lhc:1 kirc:1                                             | MANUAL_REVIEW                                         |
| LCN1      | L10   | L:7         | 1.1770058029015e-09   | 7  | paad:3 lud:2 lgg:1 coadread:1                                         | ALIGNABILITY                                          |
| LGALS9B   | A36   | T:6 V:1     | 2.37426364032799e-07  | 7  | lhc:4 skcm:1 paad:1 kich:1                                            | ALIGNABILITY                                          |
| LILRB5    | P550  | S:7 P:1 L:1 | 6.39585323633088e-06  | 9  | coadread:7 skcm:1 pannet:1                                            | LOW_AF_FRAC CENTER_BIAS                               |
| LPHN1     | G1327 | G:10 C:1    | 3.5069019679204e-17   | 11 | paad:4 hncs:2 skcm:1 lud:1 kirp:1 brca:1 acc:1                        | LOCAL_ENTROPY                                         |
| LRP3      | P111  | P:7         | 9.66380932835389e-10  | 7  | brca:5 usc:1 blca:1                                                   | MANUAL_REVIEW                                         |
| LRRC37A3  | S369  | T:4         | 0.00330086079248381   | 4  | gbm:4                                                                 | ALIGNABILITY                                          |
| LRRC43    | K526  | R:4 E:2     | 2.1439677761335e-06   | 6  | coadread:4 kirc:2                                                     | LOCAL_ENTROPY                                         |
| LSM14A    | A267  | A:9 V:1     | 1.56797210751577e-14  | 10 | acc:4 kirp:2 prad:1 lhc:1 kich:1 coadread:1                           | MANUAL_REVIEW                                         |
| LTBP4     | A868  | A:9 S:1     | 2.12573868811163e-08  | 10 | acc:5 stad:1 prad:1 paad:1 lhc:1 kirp:1                               | MANUAL_REVIEW                                         |
| MADCAM1   | Q254  | P:4         | 0.000492397265795728  | 4  | kirc:3 acc:1                                                          | MANUAL_REVIEW                                         |
| MAGI1     | Q410  | Q:6*1       | 4.08633638601348e-06  | 7  | lhc:3 kich:2 stad:1 coadread:1                                        | HOMOPOLYMER ALIGNABILITY                              |
| MAGI1     | Q412  | Q:5         | 0.00418705837316422   | 5  | paad:3 prad:1 kirc:1                                                  | HOMOPOLYMER ALIGNABILITY                              |
| MAML2     | Q596  | Q:28        | 2.2339509998849e-48   | 28 | coadread:12 lhc:5 brca:4 kirp:3 paad:2 kich:1 acc:1                   | HOMOPOLYMER ALIGNABILITY                              |
| MAML2     | Q604  | Q:19        | 3.4438201222283e-29   | 19 | coadread:10 lhc:6 kirc:1 kich:1 acc:1                                 | HOMOPOLYMER ALIGNABILITY                              |
| MAML2     | Q607  | Q:6         | 1.59381605914845e-05  | 6  | lhc:5 acc:1                                                           | HOMOPOLYMER ALIGNABILITY                              |
| MAML2     | Q611  | Q:6         | 5.06155844021584e-05  | 6  | kich:2 lhc:1 kirp:1 coadread:1 brca:1                                 | HOMOPOLYMER ALIGNABILITY                              |
| MAML2     | Q647  | Q:5         | 0.00149343743855987   | 5  | lhc:2 kirp:2 coadread:1                                               | HOMOPOLYMER ALIGNABILITY                              |
| MAML3     | Q491  | Q:5         | 0.000637877073386873  | 5  | stad:2 coadread:2 prad:1                                              | HOMOPOLYMER                                           |
| MAML3     | Q492  | Q:5         | 0.000637877073386873  | 5  | lhc:2 coadread:2 paad:1                                               | HOMOPOLYMER                                           |
| MAML3     | Q494  | Q:17        | 1.13044059540817e-26  | 17 | paad:10 lhc:2 kirp:2 skcm:1 lud:1 coadread:1                          | SUBCLONAL_FRAC HOMOPOLYMER ALIGNABILITY               |
| MAML3     | Q497  | Q:34        | 2.77873833861213e-65  | 34 | paad:18 hncs:5 prad:3 lud:3 lgg:2 ucs:1 skcm:1 coadread:1             | SUBCLONAL_FRAC HOMOPOLYMER ALIGNABILITY               |
| MAMLD1    | Q572  | L:7         | 1.61776553972515e-09  | 7  | ucs:2 stad:2 skcm:1 paad:1 hncs:1                                     | HOMOPOLYMER ALIGNABILITY                              |
| MAP4      | A391  | A:4         | 0.000712584128037591  | 4  | lgg:2 paad:3 lud:1                                                    | MANUAL_REVIEW                                         |
| MAPKAPK2  | T25   | P:4         | 0.00162801281956399   | 4  | lhc:3 prad:1                                                          | LOCAL_ENTROPY                                         |
| MB21D2    | Q311  | E:17*5      | 1.95944926054102e-24  | 22 | lud:7 hncs:5 cesc:3 usc:2 brca:2 blca:2 csc:1                         | MANUAL_REVIEW                                         |
| MEOX2     | H76   | H:8         | 4.04737020135188e-06  | 8  | lhc:4 kirp:2 coadread:2                                               | SUBCLONAL_FRAC LOCAL_ENTROPY HOMOPOLYMER ALIGNABILITY |
| MESP2     | Q186  | Q:10 E:1    | 2.51873441781962e-15  | 11 | coadread:8 acc:2 csc:1                                                | LOCAL_ENTROPY                                         |
| MGA       | R2435 | Q:5 W:3     | 0.0034433287290084    | 8  | coadread:3 ov:2 ucec:1 mbl:1 hncs:1                                   | HOMOPOLYMER                                           |
| MGAM      | P1327 | P:7 H:1     | 2.03866285348107e-05  | 8  | prad:2 gbm:2 skcm:1 lud:1 lgg:1 coadread:1                            | MANUAL_REVIEW                                         |
| MLLT3     | S155  | S:39        | 6.00189141737277e-59  | 39 | paad:25 lud:5 skcm:3 prad:1 usc:1 lhc:1 kich:1 coadread:1 brca:1      | SUBCLONAL_FRAC HOMOPOLYMER ALIGNABILITY               |
| MLLT3     | S157  | S:26        | 2.00953396807977e-34  | 26 | paad:12 lhc:5 hncs:4 prad:2 kirp:2 lud:1                              | HOMOPOLYMER ALIGNABILITY                              |
| MLLT3     | S166  | S:39        | 6.00189141737277e-59  | 39 | paad:25 prad:5 lhc:2 ucs:1 usc:1 lgg:1 kich:1 hncs:1 cesc:1           | SUBCLONAL_FRAC HOMOPOLYMER ALIGNABILITY               |
| MLLT3     | S167  | S:88        | 1.52351180474301e-167 | 88 | hncs:21 paad:15 lud:14 prad:10 skcm:8 lgg:6 blca:4 usc:2 lhc:2 kirp:1 | SUBCLONAL_FRAC HOMOPOLYMER ALIGNABILITY               |
| MLLT3     | S168  | S:85        | 3.09023212804239e-158 | 85 | paad:37 hncs:14 lud:8 lgg:6 prad:5 ucs:3 skcm:3 usc:2 lhc:2 blca:2    | SUBCLONAL_FRAC HOMOPOLYMER ALIGNABILITY               |
| MLLT3     | S177  | S:6         | 0.00298221562928521   | 6  | paad:3 stad:1 lhc:1 hncs:1                                            | HOMOPOLYMER ALIGNABILITY                              |
| MLLT3     | S188  | S:19        | 2.45993549135322e-22  | 19 | paad:6 prad:4 lud:3 hncs:2 lhc:1 lgg:1 kirp:1 coadread:1              | HOMOPOLYMER ALIGNABILITY                              |
| MN1       | Q532  | Q:4         | 0.00825465425064789   | 4  | lhc:2 prad:1 acc:1                                                    | HOMOPOLYMER ALIGNABILITY                              |
| MN1       | Q533  | Q:8         | 2.31918750166686e-10  | 8  | lhc:3 acc:2 paad:1 kich:1 coadread:1                                  | HOMOPOLYMER ALIGNABILITY                              |
| MN1       | Q534  | Q:4 H:1     | 0.000314518564583385  | 5  | prad:1 lud:1 lhc:1 hncs:1 coadread:1                                  | HOMOPOLYMER ALIGNABILITY                              |
| MN1       | Q544  | Q:4         | 0.00418974937228315   | 4  | kich:2 brca:1 acc:1                                                   | HOMOPOLYMER ALIGNABILITY                              |
| MSN       | E334  | E:6 G:1     | 0.00217360268074745   | 7  | lud:6 usc:1 lhc:1 coadread:1                                          | LOCAL_ENTROPY                                         |
| MSN       | E349  | G:4         | 0.0027214570720514    | 4  | lud:3 lhc:1                                                           | FP_RICH_GENE                                          |
| MST1      | P349  | L:13        | 1.97813131373353e-14  | 13 | paad:8 acc:2 prad:1 lgg:1 gbc:1                                       | FP_RICH_GENE                                          |
| MST1      | A367  | G:5 T:1     | 6.56943205573518e-05  | 6  | paad:3 lgg:1 coadread:1 cesc:1                                        | FP_RICH_GENE                                          |
| MST1      | R374  | C:7 R:1 H:1 | 6.56943205573518e-05  | 9  | paad:2 mbl:1 usc:1 kirp:1 gbm:1 coadread:1 cesc:1 blca:1              | ALIGNABILITY                                          |
| MST1      | D472  | A:3 N:2     | 0.00561502493798523   | 5  | lhc:5                                                                 | FP_RICH_GENE                                          |
| MTSSL1L   | G541  | G:7         | 1.60093165024751e-08  | 7  | acc:4 lud:1 hncs:1 brca:1                                             | MANUAL_REVIEW                                         |
| MUC1      | T112  | P:8         | 2.17501750380343e-11  | 8  | paad:3 lgg:2 stad:1 prad:1 blca:1                                     | MANUAL_REVIEW                                         |
| MUC16     | P328  | P:14        | 4.38471600478378e-19  | 14 | paad:7 hca:5 hncs:1 blca:1                                            | FP_MUTSIG                                             |

|        |            |                 |                       |     |                                                                      |                                                       |
|--------|------------|-----------------|-----------------------|-----|----------------------------------------------------------------------|-------------------------------------------------------|
| MUC21  | S133       | G:5 R:1         | 2.08964115029675e-06  | 6   | skcm:1 prad:1 paad:1 luad:1 hncs:1 brca:1                            | FP_RICH_GENE                                          |
| MUC21  | S358       | N:9 G:1         | 1.92992418353801e-11  | 10  | paad:7 prad:1 lusc:1 luad:1                                          | LOW_AF_FRAC                                           |
| MUC3A  | R218       | I:5 S:4         | 1.72140315295091e-07  | 9   | skcm:9                                                               | SUBCLONAL_FRAC LOW_AF_FRAC                            |
| MUC3A  | G219       | *:4 E:3         | 0.000605162423636843  | 7   | skcm:7                                                               | SUBCLONAL_FRAC LOW_AF_FRAC                            |
| MUC4   | M111       | K:6 Q:2         | 1.20641630934644e-08  | 8   | lhc:4 coadread:4                                                     | SUBCLONAL_FRAC LOW_AF_FRAC FP_MUTSIG                  |
| MUC4   | T113       | T:15            | 6.31277453173066e-23  | 15  | coadread:15                                                          | SUBCLONAL_FRAC LOW_AF_FRAC CENTER_BIAS FP_MUTSIG      |
| MUC4   | A114       | V:8             | 1.07469383557596e-06  | 8   | lhc:6 coadread:2                                                     | SUBCLONAL_FRAC FP_MUTSIG                              |
| MUC4   | V1001      | E:13 A:1        | 2.33638136753705e-18  | 14  | hncs:5 lgg:2 ucec:1 prad:1 paad:1 luad:1 kirc:1 gbm:1 cesc:1         | FP_RICH_GENE FP_MUTSIG                                |
| MUC4   | T2180      | T:9             | 0.00193571286731319   | 9   | lhc:4 acc:3 ucs:1 kich:1                                             | ALIGNABILITY FP_MUTSIG                                |
| MUC4   | T2340      | T:6             | 1.97700290471666e-05  | 6   | lhc:6                                                                | ALIGNABILITY FP_MUTSIG                                |
| MUC4   | T2347      | S:6             | 3.45360216673917e-05  | 6   | lhc:5 kich:1                                                         | ALIGNABILITY FP_MUTSIG                                |
| MUC4   | S2832      | S:4 P:2         | 4.23821430402436e-05  | 6   | lhc:3 kich:2 brca:1                                                  | FP_RICH_GENE FP_MUTSIG                                |
| MUC4   | S3370      | T:6             | 2.8380983732054e-06   | 6   | luad:2 paad:1 lgg:1 kirc:1 kirc:1                                    | FP_RICH_GENE FP_MUTSIG                                |
| MUC4   | S3512      | S:5             | 0.00048732949950598   | 5   | kirc:2 paad:1 lhc:1 brca:1                                           | ALIGNABILITY FP_MUTSIG                                |
| MUC4   | T4203      | T:4 S:1 R:1     | 2.33424037654262e-05  | 6   | kich:2 hncs:2 skcm:1 paad:1                                          | ALIGNABILITY FP_MUTSIG                                |
| MUC4   | H4205      | Q:54 D:3        | 1.63294436532244e-70  | 57  | hncs:10 paad:8 lgg:7 prad:6 luad:5 kirc:5 gbm:5 ucs:4 skcm:3 blca:3  | ALIGNABILITY FP_MUTSIG                                |
| MUC4   | A4206      | T:6 A:3         | 0.000636401301641845  | 9   | lhc:5 skcm:1 prad:1 kich:1 hncs:1                                    | ALIGNABILITY FP_MUTSIG                                |
| MUC4   | D4213      | D:9 N:6 S:1     | 7.73034293925199e-12  | 16  | paad:3 lgg:3 hncs:3 luad:2 kirc:2 prad:1 gbm:1 blca:1                | ALIGNABILITY FP_MUTSIG                                |
| MUC4   | V4227      | L:5             | 0.00297115042349339   | 5   | paad:1 lhc:1 lgg:1 kich:1 blca:1                                     | ALIGNABILITY FP_MUTSIG                                |
| MUC5B  | V678       | V:7             | 1.91626415382407e-07  | 7   | coadread:4 lhc:1 kich:1 brca:1                                       | FP_RICH_GENE FP_MUTSIG                                |
| MUC5B  | D682       | G:4             | 0.00937110190804586   | 4   | npc:1 lhc:1 kich:1 coadread:1                                        | FP_RICH_GENE FP_MUTSIG                                |
| MUC5B  | P2659      | A:10 S:1        | 2.42775195813331e-11  | 11  | paad:6 hncs:2 prad:1 luad:1 lhc:1                                    | LOCAL_ENTROPY ALIGNABILITY FP_MUTSIG                  |
| MUC5B  | P3410      | P:4             | 0.00550184768263125   | 4   | paad:3 hncs:1                                                        | LOCAL_ENTROPY ALIGNABILITY FP_MUTSIG                  |
| MUC5B  | A3607      | A:4             | 0.00550184768263125   | 4   | brca:4                                                               | ALIGNABILITY FP_MUTSIG                                |
| MUC6   | T1911      | T:23 I:2        | 3.38398303790645e-30  | 25  | coadread:22 ov:1 kirc:1 kich:1                                       | LOW_AF_FRAC CENTER_BIAS                               |
| MUC6   | F1989      | S:10 I:2 Y:1    | 7.65769009637881e-24  | 13  | lhc:7 acc:4 lusc:1 kich:1                                            | LOW_AF_FRAC                                           |
| MUC6   | H2000      | Q:7             | 2.62570713058463e-07  | 7   | lhc:5 kirc:1 brca:1                                                  | FP_RICH_GENE                                          |
| MUC7   | S173       | P:4             | 0.00398077936293432   | 4   | skcm:2 hncs:2                                                        | SUBCLONAL_FRAC                                        |
| MUC7   | S242       | P:5             | 0.000151930088185823  | 5   | skcm:5                                                               | SUBCLONAL_FRAC                                        |
| MYH9   | E925       | V:4             | 0.00899996514938172   | 4   | ucs:1 stad:1 luad:1 coadread:1                                       | LOCAL_ENTROPY HOMOPOLYMER                             |
| MYO3A  | N525       | S:3 K:2 H:2 N:1 | 3.36885376298952e-07  | 8   | ov:3 kirc:2 coadread:2 skcm:1                                        | LOCAL_ENTROPY                                         |
| MYO5B  | G1672      | G:5             | 0.00911752178027261   | 5   | mbl:2 blca:2 lhc:1                                                   | FP_RICH_GENE                                          |
| MYO5B  | V1703      | A:15            | 1.79206525519556e-23  | 15  | paad:5 skcm:3 hncs:2 ucs:1 lusc:1 lhc:1 kirc:1 cesc:1                | SUBCLONAL_FRAC                                        |
| MYOM1  | T203       | T:5             | 0.000119374077964594  | 5   | hncs:3 skcm:1 paad:1                                                 | FP_RICH_GENE                                          |
| MYOM1  | R212       | K:16 R:1        | 4.91776651522475e-22  | 17  | coadread:10 hncs:3 prad:1 lhc:1 kirc:1 gbm:1                         | LOW_AF_FRAC                                           |
| MYT1   | E267       | E:10            | 1.1712411638686e-08   | 10  | paad:4 lgg:2 ucs:1 skcm:1 luad:1 hncs:1                              | SUBCLONAL_FRAC LOCAL_ENTROPY HOMOPOLYMER ALIGNABILITY |
| MYT1   | E268       | E:19            | 1.45301751821478e-29  | 19  | paad:9 skcm:2 luad:2 lgg:2 prad:1 lhc:1 kirc:1 hncs:1                | SUBCLONAL_FRAC LOCAL_ENTROPY HOMOPOLYMER ALIGNABILITY |
| NAB2   | F208       | L:15            | 1.07580301351711e-24  | 15  | luad:3 lgg:3 skcm:2 hncs:2 gbm:2 prad:1 kirc:1 blca:1                | LOCAL_ENTROPY                                         |
| NAB2   | P211       | P:11            | 3.38465316825297e-18  | 11  | skcm:4 luad:2 prad:1 lgg:1 kirc:1 hncs:1 blca:1                      | SUBCLONAL_FRAC LOCAL_ENTROPY                          |
| NAF1   | P470       | P:11            | 1.70493884314511e-16  | 11  | paad:8 prad:2 kirc:1                                                 | LOCAL_ENTROPY                                         |
| NAP1L1 | K157       | R:5             | 6.83800191447878e-05  | 5   | lhc:4 ucec:1                                                         | MANUAL_REVIEW                                         |
| NBPF1  | S1005      | F:6 S:3         | 5.22574613802787e-06  | 9   | skcm:8 luad:1                                                        | SUBCLONAL_FRAC LOW_AF_FRAC ALIGNABILITY               |
| NBPF1  | SS16918653 | SS:134          | 0                     | 134 | luad:37 hncs:24 paad:17 skcm:12 lgg:10 lhc:9 kirc:9 prad:8 ucs:4 gt  | SUBCLONAL_FRAC LOW_AF_FRAC ALIGNABILITY               |
| NBPF10 | V99        | F:25            | 4.25957049521482e-50  | 25  | paad:6 ucs:4 skcm:4 luad:2 lhc:2 lgg:2 hncs:2 prad:1 kich:1 acc:1    | SUBCLONAL_FRAC LOW_AF_FRAC ALIGNABILITY               |
| NBPF10 | Y124       | N:7             | 5.14010328995979e-09  | 7   | kich:2 prad:1 paad:1 lhc:1 kirc:1 acc:1                              | ALIGNABILITY                                          |
| NBPF10 | L384       | L:47            | 3.96305303989266e-111 | 47  | hncs:14 prad:9 lgg:9 skcm:7 luad:5 blca:2 mrt:1                      | SUBCLONAL_FRAC LOW_AF_FRAC ALIGNABILITY               |
| NBPF10 | I1165      | F:13            | 5.37524472919554e-23  | 13  | lhc:6 brca:3 kirc:1 kich:1 cesc:1 acc:1                              | SUBCLONAL_FRAC ALIGNABILITY                           |
| NBPF10 | D1168      | E:4 G:3         | 7.11297285347282e-05  | 7   | lhc:2 kirc:2 kich:1 coadread:1 brca:1                                | ALIGNABILITY                                          |
| NBPF10 | V1189      | A:5             | 3.73115513714174e-05  | 5   | gbm:4 nbl:1                                                          | ALIGNABILITY                                          |
| NBPF10 | N1369      | D:10            | 2.02905640231362e-18  | 10  | luad:4 prad:3 paad:2 lgg:1                                           | ALIGNABILITY                                          |
| NBPF10 | C3017      | S:6             | 1.48888491466074e-07  | 6   | paad:4 skcm:1 lgg:1                                                  | ALIGNABILITY                                          |
| NBPF10 | G3070      | E:5             | 0.00183035936165841   | 5   | skcm:4 hncs:1                                                        | SUBCLONAL_FRAC ALIGNABILITY                           |
| NBPF10 | K3445      | K:97 R:1        | 4.35903181820414e-276 | 98  | luad:27 hncs:23 prad:11 paad:11 skcm:8 lgg:8 gbm:4 kirc:3 ucs:2 blc  | SUBCLONAL_FRAC LOW_AF_FRAC LOCAL_ENTROPY ALIGNABILITY |
| NBPF10 | E3455      | K:56            | 6.79426676625387e-105 | 56  | luad:13 hncs:8 skcm:7 prad:7 gbm:6 paad:5 lgg:5 ucs:2 blca:2 mrt:1   | SUBCLONAL_FRAC LOW_AF_FRAC LOCAL_ENTROPY ALIGNABILITY |
| NBPF15 | L604       | L:4 *:1         | 3.26571653837416e-05  | 5   | luad:2 prad:1 paad:1 coadread:1                                      | ALIGNABILITY                                          |
| NBPF3  | E413       | G:10            | 1.76650706591609e-15  | 10  | paad:3 luad:3 lhc:3 prad:1                                           | ALIGNABILITY                                          |
| NCOA3  | Q1252      | Q:8             | 2.58637729234198e-08  | 8   | prad:3 luad:2 skcm:1 paad:1 blca:1                                   | LOW_AF_FRAC HOMOPOLYMER ALIGNABILITY                  |
| NCOA3  | Q1255      | Q:9             | 6.6374385751499e-10   | 9   | coadread:6 hncs:2 kich:1                                             | HOMOPOLYMER ALIGNABILITY                              |
| NCOA3  | Q1262      | Q:35            | 3.49546147706215e-65  | 35  | paad:19 luad:5 hncs:4 lhc:2 coadread:2 prad:1 lgg:1 blca:1           | SUBCLONAL_FRAC HOMOPOLYMER ALIGNABILITY               |
| NCOA6  | Q264       | Q:5             | 0.00357746407458401   | 5   | paad:4 ucec:1                                                        | HOMOPOLYMER                                           |
| NCOA6  | Q265       | Q:6             | 3.23277279328044e-05  | 6   | paad:2 mbl:1 lhc:1 kirc:1 blca:1                                     | LOCAL_ENTROPY HOMOPOLYMER                             |
| NCOA6  | Q269       | Q:138           | 0                     | 138 | paad:50 hncs:18 lgg:13 prad:11 luad:11 lhc:6 ucs:5 skcm:4 kirc:4 luc | SUBCLONAL_FRAC HOMOPOLYMER ALIGNABILITY               |
| NCOR2  | Q499       | Q:22            | 6.16712117002267e-40  | 22  | coadread:6 hncs:4 paad:3 hncs:2 ucs:1 ucec:1 stad:1 skcm:1 luad:1 k  | HOMOPOLYMER                                           |
| NEFH   | E645       | E:31 K:30       | 6.8685561842596e-121  | 61  | coadread:49 kirc:7 lhc:2 acc:2 blca:1                                | FP_RICH_GENE                                          |
| NEFH   | A646       | A:32            | 4.7162569812942e-75   | 32  | coadread:31 acc:1                                                    | CENTER_BIAS                                           |
| NEFH   | P655       | P:41            | 1.10985420942009e-96  | 41  | coadread:15 lhc:12 acc:12 paad:1 kich:1                              | LOCAL_ENTROPY                                         |
| NFE2L3 | C595       | Y:10            | 1.68036991856525e-13  | 10  | paad:8 prad:1 gbm:1                                                  | MANUAL_REVIEW                                         |
| NGEF   | E221       | E:7             | 1.5051597659942e-05   | 7   | luad:2 ucec:1 prad:1 paad:1 mbl:1 coadread:1                         | LOW_AF_FRAC LOCAL_ENTROPY HOMOPOLYMER                 |
| NLRP6  | E611       | G:10            | 3.92614336710157e-18  | 10  | thca:3 paad:2 luad:2 stad:1 prad:1 hncs:1                            | LOW_AF_FRAC LOCAL_ENTROPY HOMOPOLYMER                 |
| NOTCH2 | A3         | V:7             | 8.30858115354486e-06  | 7   | paad:2 luad:2 prad:1 lgg:1 esca:1                                    | MANUAL_REVIEW                                         |
| NPEPPS | F433       | C:5             | 2.56734269251348e-05  | 5   | kirc:2 lhc:1 hncs:1 brca:1                                           | MANUAL_REVIEW                                         |
| NPIPA1 | S267       | P:3             | 0.00956937417590431   | 3   | prad:1 paad:1 luad:1                                                 | ALIGNABILITY                                          |
| NPIPA5 | L290       | F:21            | 4.10827779398217e-40  | 21  | prad:5 hncs:5 lgg:3 gbm:3 luad:2 ucs:1 skcm:1 paad:1                 | SUBCLONAL_FRAC LOW_AF_FRAC ALIGNABILITY               |
| NPIPA5 | L298       | P:4             | 0.000139383515713733  | 4   | hncs:2 paad:1 luad:1                                                 | ALIGNABILITY                                          |

|         |       |                 |                       |    |                                                                    |                                                       |
|---------|-------|-----------------|-----------------------|----|--------------------------------------------------------------------|-------------------------------------------------------|
| NPIPB11 | H27   | H:10            | 5.34394346918324e-08  | 10 | paad:7 uad:1 gbm:1 esca:1                                          | ALIGNABILITY                                          |
| NPIPB5  | A521  | P:7 A:1         | 4.96432392301749e-11  | 8  | paad:3 skcm:1 prad:1 uad:1 lihc:1 acc:1                            | LOW_AF_FRAC ALIGNABILITY                              |
| NPIPB6  | T285  | P:4             | 0.00191649482731539   | 4  | uad:2 skcm:1 hnscc:1                                               | ALIGNABILITY                                          |
| NR1D1   | S23   | P:6             | 1.41716195503852e-08  | 6  | gbm:2 prad:1 lihc:1 kirp:1 brca:1                                  | MANUAL_REVIEW                                         |
| NR1H2   | Q173  | Q:13            | 3.50679509919512e-19  | 13 | lihc:8 acc:4 kich:1                                                | MANUAL_REVIEW                                         |
| NR3C2   | P697  | P:14            | 4.73228189236533e-21  | 14 | paad:8 gg:3 uad:2 stad:1                                           | LOCAL_ENTROPY                                         |
| NRD1    | E150  | V:15            | 1.79526119481745e-27  | 15 | lihc:8 coadread:5 kich:1 csc:1                                     | SUBCLONAL_FRAC LOCAL_ENTROPY                          |
| NRD1    | E154  | D:5             | 0.000253974477462598  | 5  | coadread:3 csc:2                                                   | SUBCLONAL_FRAC LOCAL_ENTROPY HOMOPOLYMER ALIGNABILITY |
| NUDT10  | E69   | E:28            | 2.41430366461159e-47  | 28 | uad:7 acc:4 lihc:3 gg:3 kich:3 ucs:2 prad:2 paad:2 skcm:1 hnscc:1  | MANUAL_REVIEW                                         |
| NUFIP2  | H45   | N:6             | 3.9612449357648e-05   | 6  | prad:2 paad:2 uad:2                                                | LOW_AF_FRAC LOCAL_ENTROPY                             |
| NUMBL   | S113  | F:4 S:2         | 0.00681537857660096   | 6  | skcm:2 hnscc:2 paad:1 coadread:1                                   | FP_RICH_GENE                                          |
| NUMBL   | Q433  | Q:10            | 7.91596802305223e-14  | 10 | coadread:4 acc:3 kich:2 gbc:1                                      | ALIGNABILITY                                          |
| NUMBL   | Q435  | Q:11            | 1.49523720448055e-15  | 11 | coadread:6 gbc:2 acc:2 kich:1                                      | ALIGNABILITY                                          |
| NUMBL   | Q439  | Q:7             | 1.8449851827475e-07   | 7  | coadread:4 acc:2 lihc:1                                            | SUBCLONAL_FRAC ALIGNABILITY                           |
| NUTM2F  | K355  | N:6             | 6.0709421278057e-05   | 6  | coadread:6                                                         | ALIGNABILITY                                          |
| OGFR    | E556  | K:12            | 5.24401571066034e-08  | 12 | acc:8 coadread:2 brca:2                                            | ALIGNABILITY                                          |
| OGFR    | S557  | T:11            | 1.81881398328066e-16  | 11 | acc:10 paad:1                                                      | ALIGNABILITY                                          |
| OTUD4   | H897  | H:21            | 4.78173258795323e-42  | 21 | paad:7 thca:5 prad:2 lihc:2 gg:2 skcm:1 gbm:1 blca:1               | SUBCLONAL_FRAC LOW_AF_FRAC                            |
| OTUD4   | T909  | I:31            | 5.7668856512093e-60   | 31 | paad:10 thca:5 prad:3 lihc:3 gg:3 blca:3 uad:2 skcm:1 gbm:1        | SUBCLONAL_FRAC LOW_AF_FRAC                            |
| OTX1    | H296  | H:5             | 5.94617777174632e-05  | 5  | paad:2 skcm:1 hnscc:1 coadread:1                                   | HOMOPOLYMER                                           |
| PABPC1  | T319  | I:11            | 6.64141708071131e-16  | 11 | lihc:3 acc:3 kich:2 gbc:2 kir:1                                    | MANUAL_REVIEW                                         |
| PARG    | A99   | T:63            | 1.56655730132076e-151 | 63 | hnscc:17 uad:16 paad:11 skcm:4 prad:4 gg:4 gbm:4 kirp:2 lihc:1     | SUBCLONAL_FRAC LOW_AF_FRAC ALIGNABILITY               |
| PARP4   | Q1059 | R:4 *:1         | 0.000100637501792239  | 5  | brca:4 prad:1                                                      | MANUAL_REVIEW                                         |
| PARP4   | T1170 | I:5             | 0.000213874026139592  | 5  | acc:2 lihc:1 coadread:1 brca:1                                     | MANUAL_REVIEW                                         |
| PBX2    | G99   | G:6             | 2.13147348349983e-05  | 6  | kirp:2 skcm:1 lihc:1 kir:1 gbm:1                                   | FP_RICH_GENE                                          |
| PBX2    | Y262  | F:19            | 3.01647167137473e-34  | 19 | paad:6 hnscc:4 usc:3 uad:2 kirp:2 ucs:1 kir:1                      | SUBCLONAL_FRAC                                        |
| PCBP1   | L100  | Q:10 P:1        | 5.66178921341819e-19  | 11 | coadread:10 lihc:1                                                 | MANUAL_REVIEW                                         |
| PCDH17  | L1072 | V:6 L:5 M:2     | 1.11517299684575e-13  | 13 | stad:3 esca:3 coadread:3 prad:1 paad:1 usc:1 cl:1                  | SUBCLONAL_FRAC                                        |
| PCDH17  | L352  | I:22            | 2.44310738859026e-19  | 22 | coadread:22                                                        | LOW_AF_FRAC CENTER_BIAS                               |
| PCDH17  | T573  | T:14 A:1        | 3.31080461231768e-08  | 15 | acc:14 lihc:1                                                      | ALIGNABILITY                                          |
| PCDH17  | A526  | A:20 E:2 S:1    | 1.12192836079241e-12  | 23 | paad:9 acc:6 prad:2 hnscc:2 ucec:1 usm:1 uad:1 kir:1               | ALIGNABILITY                                          |
| PCLO    | S496  | P:16            | 1.79155953527989e-22  | 16 | paad:9 prad:3 uad:1 hnscc:1 gbm:1 blca:1                           | FP_MUTSIG                                             |
| PCNT    | S162  | G:8             | 3.35534987534897e-11  | 8  | uad:3 gg:3 prad:2                                                  | LOW_AF_FRAC                                           |
| PDS5B   | R394  | *:4 T:1         | 0.0016700257497399    | 5  | ucec:1 stad:1 paad:1 uad:1 coadread:1                              | HOMOPOLYMER                                           |
| PDXDC1  | A407  | A:13            | 1.54663400049542e-11  | 13 | coadread:12 kich:1                                                 | SUBCLONAL_FRAC LOW_AF_FRAC CENTER_BIAS                |
| PER1    | T866  | P:6             | 4.96841989306848e-07  | 6  | mbi:1 uad:1 gg:1 kirp:1 hnscc:1 brca:1                             | MANUAL_REVIEW                                         |
| PGM5    | I98   | V:25            | 5.35760991496013e-48  | 25 | stad:19 coadread:2 ucs:1 prad:1 hnscc:1 esca:1                     | SUBCLONAL_FRAC ALIGNABILITY                           |
| PHLDA1  | Q190  | H:5             | 0.000273018613594302  | 5  | brca:4 csc:1                                                       | HOMOPOLYMER                                           |
| PHLDA1  | Q194  | Q:5             | 0.000273018613594302  | 5  | coadread:4 kich:1                                                  | HOMOPOLYMER                                           |
| PKD1    | L2613 | L:7             | 7.02690104189717e-09  | 7  | uad:2 kirp:2 gg:1 hnscc:1 gbm:1                                    | FP_RICH_GENE                                          |
| PKD1    | L2696 | R:6             | 1.59203737950586e-08  | 6  | acc:3 brca:2 kich:1                                                | ALIGNABILITY                                          |
| PLXNA1  | G36   | G:34            | 5.50096594769764e-69  | 34 | blca:1 hnscc:7 skcm:6 acc:4 uad:2 gg:2 kir:2                       | MANUAL_REVIEW                                         |
| PLXNA1  | T726  | P:5             | 0.000157158235599651  | 5  | skcm:3 mbi:1 uad:1                                                 | MANUAL_REVIEW                                         |
| PNKP    | P16   | P:14            | 1.61558516930103e-26  | 14 | hnscc:3 skcm:2 usc:2 uad:2 blca:2 acc:2 gg:1                       | SUBCLONAL_FRAC                                        |
| PNKP    | G18   | G:7             | 1.12249270860308e-10  | 7  | acc:5 uad:1 blca:1                                                 | FP_RICH_GENE                                          |
| POLDIP2 | K27   | R:4             | 0.000860661032341772  | 4  | csc:3 kir:1                                                        | MANUAL_REVIEW                                         |
| POLR3B  | L368  | F:23            | 1.84751862852996e-38  | 23 | skcm:4 paad:4 uad:4 kir:3 hnscc:2 blca:2 usc:1 lihc:1 kirp:1 csc:1 | LOCAL_ENTROPY                                         |
| POLR3B  | L369  | F:5             | 0.000234113172090203  | 5  | paad:4 blca:1                                                      | LOCAL_ENTROPY                                         |
| POLR3B  | L372  | F:22            | 3.194165250019e-26    | 22 | paad:14 uad:2 gg:2 blca:2 prad:1 hnscc:1                           | LOCAL_ENTROPY                                         |
| POTEM   | V308  | A:14            | 1.02766934948567e-21  | 14 | paad:3 uad:3 hnscc:3 gbm:2 skcm:1 prad:1 gg:1                      | LOW_AF_FRAC ALIGNABILITY                              |
| POU2F1  | T761  | A:4             | 0.00903997743785799   | 4  | skcm:2 paad:2                                                      | LOCAL_ENTROPY HOMOPOLYMER                             |
| PPIAL4G | H69   | R:7             | 7.16286560360686e-06  | 7  | lihc:7                                                             | ALIGNABILITY                                          |
| PPM1E   | E32   | E:5             | 0.00412235081514813   | 5  | lihc:4 coadread:1                                                  | MANUAL_REVIEW                                         |
| PRB1    | G104  | E:4 K:3 V:1 *:1 | 0.000175574478564162  | 9  | skcm:4 csc:4 hnscc:1                                               | SUBCLONAL_FRAC ALIGNABILITY                           |
| PRDM2   | D284  | E:5             | 0.00024584516667604   | 5  | stad:1 lihc:1 kir:1 coadread:1 acc:1                               | HOMOPOLYMER                                           |
| PRG4    | T377  | T:18            | 1.28806599288297e-18  | 18 | paad:15 skcm:1 prad:1 hnscc:1                                      | FP_RICH_GENE                                          |
| PRG4    | T401  | P:8             | 2.96419204172653e-08  | 8  | uad:2 gg:2 paad:1 ov:1 kir:1 hnscc:1                               | LOW_AF_FRAC LOCAL_ENTROPY HOMOPOLYMER                 |
| PRG4    | T408  | T:12            | 9.80485900248796e-17  | 12 | paad:6 prad:2 skcm:1 gg:1 kirp:1 kir:1                             | FP_RICH_GENE                                          |
| PRG4    | T417  | P:7             | 1.01155434323596e-06  | 7  | prad:3 uad:2 skcm:1 blca:1                                         | LOW_AF_FRAC LOCAL_ENTROPY HOMOPOLYMER                 |
| PRG4    | T460  | A:7 S:1         | 1.52327038950427e-07  | 8  | paad:6 usc:1 hnscc:1                                               | FP_RICH_GENE                                          |
| PRG4    | T572  | A:6 T:1         | 1.70618129979314e-05  | 7  | paad:2 skcm:1 uad:1 hnscc:1 gbm:1 esca:1                           | FP_RICH_GENE                                          |
| PRG4    | T579  | T:8             | 1.30743015274389e-08  | 8  | paad:7 gg:1                                                        | FP_RICH_GENE                                          |
| PRG4    | K710  | K:23            | 3.44386841050094e-35  | 23 | paad:8 uad:6 prad:5 skcm:1 lihc:1 kirp:1 blca:1                    | SUBCLONAL_FRAC LOW_AF_FRAC ALIGNABILITY               |
| PRKCSH  | E322  | E:6             | 0.00020891146759687   | 6  | lihc:3 kirp:2 brca:1                                               | LOCAL_ENTROPY                                         |
| PRMT8   | S31   | P:13            | 3.6038565884501e-21   | 13 | paad:9 gg:2 stad:1 uad:1                                           | MANUAL_REVIEW                                         |
| PSPH    | V116  | I:7             | 7.08981147982827e-08  | 7  | gbm:3 paad:1 usc:1 lihc:1 kich:1                                   | MANUAL_REVIEW                                         |
| PWWP2B  | T97   | P:4             | 0.00064786701214546   | 4  | paad:3 hnscc:1                                                     | LOCAL_ENTROPY                                         |
| QRICH2  | D601  | V:9             | 9.13108457406579e-14  | 9  | lihc:6 acc:2 kirp:1                                                | LOW_AF_FRAC                                           |
| RAB12   | G49   | G:7             | 1.03572438132624e-07  | 7  | prad:2 hnscc:2 paad:1 uad:1 kich:1                                 | MANUAL_REVIEW                                         |
| RAB5A   | N113  | K:3 S:1         | 0.00215899284845089   | 4  | coadread:3 stad:1                                                  | LOCAL_ENTROPY                                         |
| RAD17   | N533  | K:7             | 1.57200520226503e-08  | 7  | paad:5 uad:1 hnscc:1                                               | LOCAL_ENTROPY ALIGNABILITY                            |
| RALY    | G231  | S:10 G:1        | 2.34472310386296e-08  | 11 | coadread:8 lihc:2 brca:1                                           | LOCAL_ENTROPY HOMOPOLYMER ALIGNABILITY                |
| RANBP2  | P780  | P:18            | 1.31577833199279e-15  | 18 | paad:16 prad:2                                                     | LOW_AF_FRAC ALIGNABILITY                              |
| RANBP2  | K812  | N:7             | 3.6014346530493e-08   | 7  | paad:6 skcm:1                                                      | LOW_AF_FRAC ALIGNABILITY                              |

|           |       |             |                      |    |                                                              |                                                       |
|-----------|-------|-------------|----------------------|----|--------------------------------------------------------------|-------------------------------------------------------|
| RANBP6    | I984  | L:9         | 9.36026318725596e-12 | 9  | lhc:3 lusc:2 lud:1 kich:1 gbm:1 blca:1                       | SUBCLONAL_FRAC LOW_AF_FRAC                            |
| RANBP9    | P10   | Q:10        | 1.67445396164838e-08 | 10 | skcm:2 paad:2 stad:1 prad:1 lgg:1 kirp:1 hncs:1 blca:1       | SUBCLONAL_FRAC LOCAL_ENTROPY HOMOPOLYMER ALIGNABILITY |
| RANGAP1   | V268  | G:6         | 6.60590637306139e-07 | 6  | hncs:2 skcm:1 mbl:1 lud:1 kirc:1                             | FP_RICH_GENE                                          |
| RANGAP1   | E390  | E:5 D:1     | 9.14278399598953e-05 | 6  | paad:3 lhc:2 lud:1                                           | LOCAL_ENTROPY HOMOPOLYMER ALIGNABILITY                |
| RAPH1     | P715  | P:4         | 0.00143206636272066  | 4  | lgg:2 skcm:1 kirp:1                                          | LOCAL_ENTROPY                                         |
| RBM10     | E119  | D:10        | 7.64797901152037e-11 | 10 | paad:4 prad:2 lud:1 lhc:1 esca:1 blca:1                      | LOCAL_ENTROPY HOMOPOLYMER ALIGNABILITY                |
| REPS1     | K141  | R:5         | 5.99058590764114e-05 | 5  | paad:2 lhc:1 prad:1 hncs:1                                   | SUBCLONAL_FRAC                                        |
| RERE      | P986  | P:7         | 1.12625770759736e-08 | 7  | kirc:2 skcm:1 paad:1 lud:1 lhc:1 kirp:1                      | MANUAL_REVIEW                                         |
| RGPD3     | N756  | D:26        | 2.81011538679858e-52 | 26 | paad:11 hncs:6 lud:3 lusc:1 skcm:1 lgg:1 kirp:1 kich:1 gbm:1 | SUBCLONAL_FRAC LOW_AF_FRAC ALIGNABILITY               |
| RGPD3     | A772  | A:13 V:3    | 1.39138123616211e-14 | 16 | paad:3 kirp:3 skcm:2 prad:2 gbm:2 lud:1 lhc:1 lgg:1 hncs:1   | SUBCLONAL_FRAC LOW_AF_FRAC ALIGNABILITY               |
| RGPD3     | L812  | R:4 L:1     | 0.000816724564259193 | 5  | ucec:1 paad:1 lhc:1 brca:1 acc:1                             | ALIGNABILITY                                          |
| RGPD8     | P1760 | A:24        | 1.36743844511457e-34 | 24 | hncs:10 skcm:5 gbm:5 lgg:4                                   | SUBCLONAL_FRAC LOW_AF_FRAC ALIGNABILITY               |
| RG512     | K1176 | E:5         | 1.25146534792438e-05 | 5  | coadread:3 stad:2                                            | LOCAL_ENTROPY                                         |
| RHPN2     | V73   | M:5         | 0.00149552909940854  | 5  | lhc:3 prad:1 acc:1                                           | FP_RICH_GENE                                          |
| RHPN2     | A353  | T:4 V:3 M:1 | 0.00459457188537275  | 8  | coadread:2 blca:2 skcm:1 paad:1 lud:1 cscs:1                 | FP_RICH_GENE                                          |
| RHPN2     | H357  | L:8         | 1.9830502300392e-09  | 8  | lud:2 lgg:2 paad:1 coadread:1 cl:1 blca:1                    | LOW_AF_FRAC                                           |
| RILPL1    | S358  | R:6         | 1.00247062419897e-06 | 6  | kich:2 prad:1 lud:1 kirc:1 cesc:1                            | MANUAL_REVIEW                                         |
| RIMBP2    | F1013 | V:5 L:1 I:1 | 2.65200720720286e-05 | 7  | stad:4 esca:1 coadread:1 brca:1                              | SUBCLONAL_FRAC                                        |
| RLIM      | T404  | T:20        | 8.73800199316602e-27 | 20 | paad:11 skcm:2 lusc:2 lud:2 lgg:2 blca:1                     | MANUAL_REVIEW                                         |
| RLIM      | S471  | S:4 P:4     | 1.40241747132541e-10 | 8  | kirp:4 kich:2 ucec:1 paad:1                                  | MANUAL_REVIEW                                         |
| RNF145    | K25   | R:9 K:4     | 1.65165303335998e-15 | 13 | lhc:6 stad:2 coadread:2 ucec:1 kich:1 cscs:1                 | LOCAL_ENTROPY HOMOPOLYMER                             |
| RNF145    | K26   | E:6 R:1     | 1.52364492326293e-09 | 7  | coadread:3 kich:2 lhc:1 gbc:1                                | SUBCLONAL_FRAC LOCAL_ENTROPY HOMOPOLYMER              |
| RNF5      | I136  | I:6         | 1.0871594251235e-05  | 6  | lusc:2 hncs:2 paad:1 lud:1                                   | LOW_AF_FRAC                                           |
| RP1L1     | G1850 | D:6         | 0.000721843457646104 | 6  | paad:3 skcm:1 lud:1 blca:1                                   | LOW_AF_FRAC                                           |
| Q1861     | Q1861 | P:6         | 1.53318187711822e-05 | 6  | kirc:2 coadread:2 lusc:1 brca:1                              | SUBCLONAL_FRAC                                        |
| RP1L1     | A1863 | A:6 D:1     | 1.1878149446609e-06  | 7  | coadread:3 kirc:2 lusc:1 cesc:1                              | FP_RICH_GENE                                          |
| RP9       | P72   | R:6         | 5.37690951365673e-05 | 6  | lud:2 prad:1 lusc:1 lgg:1 kirp:1                             | LOW_AF_FRAC                                           |
| RPF2      | I303  | I:9         | 2.52372525544715e-14 | 9  | lgg:3 paad:2 mbl:1 lud:1 blca:1 acc:1                        | MANUAL_REVIEW                                         |
| RPGR      | V1021 | E:4         | 0.00451735870452981  | 4  | coadread:3 lhc:1                                             | LOCAL_ENTROPY                                         |
| RPSAP58   | Q111  | E:12        | 5.86735404812492e-16 | 12 | gbm:7 skcm:3 lud:2                                           | SUBCLONAL_FRAC ALIGNABILITY                           |
| RRN3      | R9    | C:12        | 8.29879347096711e-10 | 12 | acc:4 kirp:3 lhc:2 skcm:1 mbl:1 lusc:1                       | ALIGNABILITY                                          |
| RRN3      | P11   | S:10        | 1.06563948590052e-12 | 10 | kirp:3 acc:3 skcm:1 mbl:1 lusc:1 lhc:1                       | FP_RICH_GENE                                          |
| RRN3      | L303  | I:4         | 0.00786300892159577  | 4  | acc:3 kirp:1                                                 | FP_RICH_GENE                                          |
| RUNX2     | Q64   | Q:15        | 7.05989051196896e-19 | 15 | paad:10 prad:2 lgg:2 hncs:1                                  | HOMOPOLYMER ALIGNABILITY                              |
| RUNX2     | Q65   | Q:22        | 3.97413969974035e-34 | 22 | paad:10 prad:4 kirp:3 lgg:2 lusc:1 stad:1 hncs:1             | HOMOPOLYMER ALIGNABILITY                              |
| RUNX2     | Q71   | E:14        | 1.42858259527216e-18 | 14 | paad:6 lhc:2 kirp:2 lusc:1 skcm:1 prad:1 hncs:1              | HOMOPOLYMER                                           |
| RVR3      | V1909 | G:12        | 1.13582452502401e-14 | 12 | skcm:5 paad:2 lud:2 kirp:1 kirc:1 blca:1                     | FP_MUTSIG                                             |
| SA2       | K102  | E:7         | 1.1008538522716e-08  | 7  | lhc:2 prad:1 paad:1 mbl:1 hncs:1 acc:1                       | MANUAL_REVIEW                                         |
| SBN01     | A1372 | V:11        | 2.1860824032411e-06  | 11 | paad:7 prad:1 lud:1 kirp:1 gbm:1                             | SUBCLONAL_FRAC LOW_AF_FRAC                            |
| SBSN      | R259  | R:7         | 6.92497942879385e-10 | 7  | lud:3 paad:2 skcm:1 lgg:1                                    | MANUAL_REVIEW                                         |
| SCAI      | Q155  | H:5         | 0.00127221594189075  | 5  | prad:1 lusc:1 lud:1 kirp:1 hncs:1                            | SUBCLONAL_FRAC                                        |
| SCRN3     | N417  | K:6 S:1     | 2.33425148211234e-08 | 7  | lhc:5 lusc:1 acc:1                                           | MANUAL_REVIEW                                         |
| SEC63     | L532  | *:7         | 3.64387448091374e-09 | 7  | paad:5 lhc:2                                                 | LOCAL_ENTROPY HOMOPOLYMER                             |
| SEH1L     | H56   | H:6         | 5.74048126232014e-07 | 6  | brca:2 kich:1 gbc:1 cscs:1 acc:1                             | MANUAL_REVIEW                                         |
| SEPT7     | Y320  | Y:12        | 6.94884693986069e-20 | 12 | skcm:5 paad:3 prad:2 kirp:1 esca:1                           | MANUAL_REVIEW                                         |
| SH2D2A    | H366  | P:5         | 9.60903956663501e-05 | 5  | paad:2 lud:2 blca:1                                          | MANUAL_REVIEW                                         |
| SHROOM4   | K1129 | Q:6         | 1.77551445838129e-06 | 6  | coadread:5 lhc:1                                             | LOCAL_ENTROPY HOMOPOLYMER ALIGNABILITY                |
| SIRPA     | V233  | I:14        | 1.19079135691439e-09 | 14 | paad:4 prad:2 lud:2 lgg:2 skcm:1 lusc:1 kirp:1 hncs:1        | LOW_AF_FRAC ALIGNABILITY                              |
| SKIDA1    | E422  | E:17        | 1.6989404566948e-25  | 17 | lhc:6 coadread:5 kirp:2 acc:2 kich:1 cscs:1                  | SUBCLONAL_FRAC LOCAL_ENTROPY HOMOPOLYMER ALIGNABILITY |
| SKIDA1    | E424  | E:5         | 4.32499024701731e-05 | 5  | brca:2 lhc:1 gbc:1 acc:1                                     | LOCAL_ENTROPY HOMOPOLYMER ALIGNABILITY                |
| SLC25A10  | *297  | C:5         | 1.04753269347555e-05 | 5  | lud:2 skcm:1 kirp:1 gbm:1                                    | MANUAL_REVIEW                                         |
| SLC25A5   | G158  | S:8         | 0.000902185022754109 | 8  | lhc:5 coadread:2 ov:1                                        | LOW_AF_FRAC                                           |
| SLC35G3   | I323  | I:8         | 2.99907663747555e-08 | 8  | hncs:4 paad:3 lusc:1                                         | LOW_AF_FRAC                                           |
| SLC35G3   | R335  | K:10 M:1    | 3.82284453678604e-08 | 11 | paad:4 prad:1 lusc:1 kirp:1 kirc:1 gbm:1 esca:1 blca:1       | SUBCLONAL_FRAC                                        |
| SLC35G5   | W103  | R:5         | 0.000840420741020319 | 5  | lhc:4 acc:1                                                  | MANUAL_REVIEW                                         |
| SLC39A5   | R309  | W:6 Q:1     | 0.00296885403241424  | 7  | paad:4 prad:2 lud:1                                          | LOW_AF_FRAC                                           |
| SLC7A10   | P509  | P:4         | 0.00167113768899988  | 4  | paad:1 lud:1 hncs:1 acc:1                                    | SUBCLONAL_FRAC                                        |
| SMARCA2   | Q222  | Q:5         | 0.000616566761459195 | 5  | lusc:1 skcm:1 prad:1 lhc:1 esca:1                            | SUBCLONAL_FRAC HOMOPOLYMER ALIGNABILITY               |
| SMARCA2   | Q223  | Q:11        | 1.75117833593925e-13 | 11 | paad:3 lhc:2 lusc:1 stad:1 skcm:1 prad:1 esca:1 cesc:1       | SUBCLONAL_FRAC HOMOPOLYMER ALIGNABILITY               |
| SMARCA2   | Q235  | Q:6         | 7.44683110891828e-05 | 6  | lhc:3 kich:2 brca:1                                          | HOMOPOLYMER                                           |
| SMG1      | H546  | R:8         | 3.57551826841461e-11 | 8  | skcm:3 paad:3 hncs:1 acc:1                                   | ALIGNABILITY                                          |
| SON       | L594  | L:5         | 5.67257065921016e-05 | 5  | lhc:4 acc:1                                                  | FP_RICH_GENE                                          |
| SON       | T808  | T:6         | 5.67257065921016e-05 | 6  | paad:5 gbm:1                                                 | ALIGNABILITY                                          |
| SPATA31A6 | C310  | C:4 Y:1     | 0.000333228155408044 | 5  | hncs:4 lgg:1                                                 | ALIGNABILITY                                          |
| SPDYE1    | G234  | R:10 G:1    | 1.51141817953784e-14 | 11 | lhc:8 coadread:2 ov:1                                        | MANUAL_REVIEW                                         |
| SPDYE3    | S418  | S:6         | 3.36271253322812e-08 | 6  | paad:4 prad:1 lhc:1                                          | LOW_AF_FRAC ALIGNABILITY                              |
| SPRR3     | G81   | G:26        | 4.85436554255545e-38 | 26 | lhc:19 acc:5 coadread:2                                      | MANUAL_REVIEW                                         |
| SPTLC3    | R97   | K:10        | 1.81600062819684e-05 | 10 | skcm:10                                                      | LOCAL_ENTROPY                                         |
| SRCRB4D   | L41   | P:4         | 0.000684549482617774 | 4  | gbm:2 lgg:1 brca:1                                           | LOCAL_ENTROPY                                         |
| SRRM1     | P566  | H:11 S:1    | 1.7479657179964e-13  | 12 | paad:5 lhc:3 lusc:1 mbl:1 kirp:1 blca:1                      | LOCAL_ENTROPY HOMOPOLYMER                             |
| SRRM1     | R570  | L:8         | 0.00124529328174419  | 8  | lhc:3 paad:2 lusc:1 mbl:1 blca:1                             | LOW_AF_FRAC                                           |
| SSC5D     | P1325 | T:7         | 8.11213167299299e-07 | 7  | lhc:2 coadread:2 acc:2 cscs:1                                | SUBCLONAL_FRAC                                        |
| STARDB    | P653  | P:6         | 1.087478886739e-06   | 6  | lud:3 skcm:1 mbl:1 blca:1                                    | MANUAL_REVIEW                                         |
| STRADB    | D407  | G:7 Y:1     | 9.45082179855479e-10 | 8  | coadread:8                                                   | LOW_AF_FRAC CENTER_BIAS ALIGNABILITY                  |

|              |             |             |                       |    |                                                                           |                                                      |
|--------------|-------------|-------------|-----------------------|----|---------------------------------------------------------------------------|------------------------------------------------------|
| SULT1A4      | Q35         | Q:4         | 0.000793387231164477  | 4  | brca:4                                                                    | ALIGNABILITY                                         |
| TAF1A        | R172        | M:6 L:1     | 0.00534796604428289   | 7  | skcm:7                                                                    | SUBCLONAL_FRAC LOW_AF_FRAC                           |
| TAF7L        | E343        | E:7         | 0.000469939973379143  | 7  | lhic:3 coadread:3 kich:1                                                  | MANUAL_REVIEW                                        |
| TBC1D3B      | G164        | R:3 E:2 G:1 | 0.000509647003141175  | 6  | skcm:3 stad:2 luad:1                                                      | SUBCLONAL_FRAC ALIGNABILITY                          |
| TBP          | Q60         | Q:20        | 1.94521784216941e-23  | 20 | lhic:6 acc:5 kirp:4 brca:3 coadread:2                                     | SUBCLONAL_FRAC HOMOPOLYMER ALIGNABILITY              |
| TBP          | Q63         | Q:9         | 4.067067794445086e-08 | 9  | lhic:6 coadread:2 acc:1                                                   | ALIGNABILITY                                         |
| TBP          | Q72         | Q:5         | 0.00493569927726044   | 5  | coadread:2 ucs:1 gg:1 kich:1                                              | SUBCLONAL_FRAC HOMOPOLYMER ALIGNABILITY              |
| TBP          | Q73         | Q:16        | 4.14677986853261e-17  | 16 | coadread:4 prad:3 luad:3 acc:2 paad:1 gg:1 kirc:1 kich:1                  | ALIGNABILITY                                         |
| TBP          | Q75         | Q:6         | 0.00121784973186565   | 6  | coadread:2 skcm:1 paad:1 luad:1 kich:1                                    | HOMOPOLYMER ALIGNABILITY                             |
| TBP          | Q76         | Q:53        | 2.87841908190622e-86  | 53 | brca:28 hncs:5 skcm:3 paad:3 ov:2 luad:2 gg:2 coadread:2 cesc:2 prad:2    | HOMOPOLYMER ALIGNABILITY                             |
| TBP          | Q77         | Q:14        | 3.91608918023995e-14  | 14 | coadread:4 paad:3 brca:2 luad:1 lhic:1 kirc:1 hncs:1 cesc:1               | HOMOPOLYMER ALIGNABILITY                             |
| TBP          | Q78         | Q:12        | 2.99365267996813e-11  | 12 | paad:3 skcm:2 luad:1 gg:1 kich:1 hncs:1 coadread:1 brca:1 acc:1           | SUBCLONAL_FRAC LOW_AF_FRAC HOMOPOLYMER ALIGNABILITY  |
| TBP          | Q79         | Q:8         | 5.47465318356119e-06  | 8  | coadread:3 prad:2 paad:1 kirc:1 hncs:1                                    | HOMOPOLYMER ALIGNABILITY                             |
| TBP          | Q80         | Q:8         | 5.47465318356119e-06  | 8  | paad:4 ucs:1 skcm:1 coadread:1 brca:1                                     | SUBCLONAL_FRAC HOMOPOLYMER ALIGNABILITY              |
| TBP          | Q82         | Q:6         | 0.00121784973186565   | 6  | paad:2 ucec:1 skcm:1 gg:1 coadread:1                                      | HOMOPOLYMER ALIGNABILITY                             |
| TBP          | Q84         | Q:7         | 9.0637173453419e-05   | 7  | luad:3 paad:2 hncs:1 coadread:1                                           | HOMOPOLYMER ALIGNABILITY                             |
| TBP          | Q86         | Q:10        | 1.73125721626378e-08  | 10 | luad:3 gg:3 prad:2 paad:1 mbi:1                                           | HOMOPOLYMER ALIGNABILITY                             |
| TCEAL3       | T114        | T:10        | 6.26592643728451e-05  | 10 | lhic:5 gbc:2 prad:1 luad:1 kirc:1                                         | LOCAL_ENTROPY ALIGNABILITY                           |
| TCEAL3       | Q150        | Q:5         | 0.000467987074176852  | 5  | lami:3 lhic:1 kirc:1                                                      | FP_RICH_GENE                                         |
| TCEAL6       | Q175        | P:4         | 0.00640408956766066   | 4  | lhic:4                                                                    | ALIGNABILITY                                         |
| TCHH         | L339        | Q:3 V:1     | 0.00728586267789009   | 4  | coadread:2 kich:1 brca:1                                                  | FP_RICH_GENE                                         |
| TCHH         | K490        | R:5         | 0.000552492036789777  | 5  | lhic:3 cesc:1 coadread:1                                                  | FP_RICH_GENE                                         |
| TCHH         | L491        | R:4         | 0.00224348181553996   | 4  | coadread:3 lhic:1                                                         | FP_RICH_GENE                                         |
| TCHH         | E493        | Q:7         | 0.00156879238286656   | 7  | coadread:5 lhic:1 kirc:1                                                  | SUBCLONAL_FRAC LOW_AF_FRAC LOCAL_ENTROPY HOMOPOLYMER |
| TCHH         | E494        | Q:10        | 7.91452535369147e-07  | 10 | coadread:8 lhic:2                                                         | SUBCLONAL_FRAC HOMOPOLYMER                           |
| TCHH         | H676        | Q:6 R:1     | 1.28478522757761e-07  | 7  | lhic:6 luad:1                                                             | FP_RICH_GENE                                         |
| TCHH         | L1043       | R:6         | 7.99454226609255e-07  | 6  | skcm:2 paad:2 luad:1 hncs:1                                               | FP_RICH_GENE                                         |
| TCHH         | R1125       | G:6         | 7.99454226609255e-07  | 6  | paad:4 prad:1 luad:1                                                      | LOCAL_ENTROPY                                        |
| TCHH         | P1158       | R:7 S:1     | 0.000752552334306564  | 8  | luad:3 prad:2 paad:2 skcm:1                                               | SUBCLONAL_FRAC                                       |
| TEKT4        | S238_splice |             | 8.71893019462149e-06  | 6  | acc:2 luad:1 kirc:1 kich:1 blca:1                                         | MANUAL_REVIEW                                        |
| THAP11       | Q116        | Q:4         | 0.00205723628654566   | 4  | lusc:1 hncs:1 blca:1 acc:1                                                | HOMOPOLYMER ALIGNABILITY                             |
| THAP11       | Q117        | Q:5         | 0.000234546469074691  | 5  | prad:2 paad:2 luad:1                                                      | HOMOPOLYMER ALIGNABILITY                             |
| TMCC1        | Q565        | L:7 R:1     | 1.19149787253848e-10  | 8  | paad:5 stad:2 prad:1                                                      | LOW_AF_FRAC HOMOPOLYMER                              |
| TMEM175      | H484        | P:7         | 6.14806191138704e-09  | 7  | luad:2 skcm:1 paad:1 gg:1 hncs:1 blca:1                                   | LOCAL_ENTROPY                                        |
| TMEM216      | G46         | G:19        | 3.36948894380528e-35  | 19 | skcm:8 gg:3 blca:2 stad:1 paad:1 luad:1 lhic:1 kirp:1 hncs:1              | MANUAL_REVIEW                                        |
| TMEM247      | Q128        | E:24        | 7.36225946136581e-45  | 24 | acc:18 coadread:3 lhic:2 brca:1                                           | SUBCLONAL_FRAC                                       |
| TMEM247      | Q153        | R:11 Q:8    | 4.1550105739987e-37   | 19 | brca:7 coadread:6 stad:4 ucec:2                                           | FP_RICH_GENE                                         |
| TMFRSS13     | Q78         | R:15        | 1.72090202424673e-25  | 15 | coadread:5 lhic:3 blca:3 ov:1 kirp:1 kich:1 cesc:1                        | MANUAL_REVIEW                                        |
| TOX4         | A429        | A:4         | 0.00192832132441091   | 4  | ucec:1 paad:1 gg:1 coadread:1                                             | HOMOPOLYMER                                          |
| TP53INP1     | E50         | E:4         | 0.0047587833067366    | 4  | stad:2 coadread:1 brca:1                                                  | LOCAL_ENTROPY HOMOPOLYMER                            |
| TRAPPC4      | V59_splice  |             | 0.00333021148151093   | 4  | luad:2 skcm:1 prad:1                                                      | MANUAL_REVIEW                                        |
| TRH          | E170        | E:11        | 4.07133157708049e-13  | 11 | paad:6 prad:2 luad:1 gg:1 gbm:1                                           | LOCAL_ENTROPY HOMOPOLYMER ALIGNABILITY               |
| TRIM49C      | N298        | N:23        | 6.64235349593525e-45  | 23 | paad:5 luad:3 lhic:3 hncs:3 brca:3 acc:2 ucs:1 skcm:1 prad:1 kirp:1       | SUBCLONAL_FRAC ALIGNABILITY                          |
| TRIM52       | E125        | E:10        | 2.45466003036563e-14  | 10 | lhic:6 coadread:2 stad:1 acc:1                                            | LOCAL_ENTROPY HOMOPOLYMER                            |
| TRIM73       | L8          | P:4         | 9.23470868095352e-05  | 4  | kich:2 lhic:1 acc:1                                                       | ALIGNABILITY                                         |
| TRIOBP       | Q398        | H:4 R:3     | 4.05899085542306e-08  | 7  | lhic:3 coadread:2 lum:1 kirp:1                                            | FP_RICH_GENE                                         |
| TRIOBP       | K413        | R:5         | 0.000137797320897422  | 5  | luad:2 paad:1 hncs:1 gbm:1                                                | ALIGNABILITY                                         |
| TRIOBP       | C432        | C:22        | 8.77720708796986e-22  | 22 | paad:8 luad:3 skcm:2 prad:2 lhic:2 hncs:2 lusc:1 gg:1 kich:1              | SUBCLONAL_FRAC LOW_AF_FRAC ALIGNABILITY              |
| TRIOBP       | C481        | C:10        | 3.97394081884021e-14  | 10 | paad:6 lhic:3 coadread:1                                                  | ALIGNABILITY                                         |
| TSHZ3        | S154        | S:6         | 0.00252452549152801   | 6  | kirp:3 prad:1 paad:1 blca:1                                               | HOMOPOLYMER ALIGNABILITY                             |
| TTN          | T1238       | T:6 P:1     | 0.000246179469070583  | 7  | esca:3 stad:2 kich:1 coadread:1                                           | FP_MUTSIG                                            |
| TTN          | S3271       | F:9         | 0.00705546106391473   | 9  | skcm:9                                                                    | FP_MUTSIG                                            |
| TUBA1C       | K164        | K:33        | 3.07975220045699e-72  | 33 | acc:2 lhic:11 coadread:1                                                  | ALIGNABILITY                                         |
| TVP23C-CDRT4 | C51         | Y:55        | 1.85728042336701e-138 | 55 | kirp:36 lhic:12 acc:7                                                     | ALIGNABILITY                                         |
| TXNDC2       | K140        | E:9         | 9.75871792871491e-11  | 9  | paad:5 luad:1 hncs:1 gbm:1 acc:1                                          | LOW_AF_FRAC                                          |
| TXNDC2       | E200        | K:9         | 4.9733657802598e-05   | 9  | paad:6 kirp:1 hncs:1 gbm:1                                                | LOW_AF_FRAC                                          |
| TXNDC2       | I329        | L:5 J:2     | 2.91113952472127e-05  | 7  | paad:6 blca:1                                                             | FP_RICH_GENE                                         |
| TYW1B        | D323        | H:11        | 1.5580149546268e-06   | 11 | luad:5 gg:2 hncs:2 paad:1 kirp:1                                          | SUBCLONAL_FRAC LOW_AF_FRAC                           |
| U2AF2        | I77_splice  |             | 3.13035198908911e-16  | 10 | paad:6 prad:1 mbi:1 luad:1 blca:1                                         | LOCAL_ENTROPY                                        |
| UBB          | E92         | E:10        | 7.97083591641121e-13  | 10 | paad:5 skcm:3 prad:1 luad:1                                               | SUBCLONAL_FRAC ALIGNABILITY                          |
| UBB          | P113        | P:7         | 4.10230188338389e-09  | 7  | paad:4 skcm:1 prad:1 kirc:1                                               | ALIGNABILITY                                         |
| UBB          | P189        | P:9         | 4.60036691091962e-08  | 9  | paad:4 hncs:2 blca:2 gbm:1                                                | ALIGNABILITY                                         |
| UBBP4        | R50         | L:20 W:1    | 2.61502186658472e-15  | 21 | paad:9 gg:4 luad:3 skcm:2 hncs:2 prad:1                                   | SUBCLONAL_FRAC ALIGNABILITY                          |
| UBBP4        | R73         | L:30 W:1    | 1.48946818465414e-27  | 31 | paad:12 luad:6 gg:4 skcm:3 prad:3 gbm:2 hncs:1                            | SUBCLONAL_FRAC ALIGNABILITY                          |
| UBBP4        | L149        | R:41        | 2.9770040616577e-79   | 41 | paad:12 luad:8 hncs:7 skcm:4 prad:4 gg:3 gbm:3                            | SUBCLONAL_FRAC ALIGNABILITY                          |
| UBC          | V222        | V:6         | 6.9502085965841e-06   | 6  | paad:3 skcm:1 prad:1 hncs:1                                               | LOW_AF_FRAC                                          |
| UNC93B1      | S445        | S:6         | 1.35260716259067e-08  | 6  | acc:3 lhic:2 kirp:1                                                       | FP_RICH_GENE                                         |
| UNC93B1      | V498        | M:6         | 1.54425571457347e-07  | 6  | cesc:2 blca:2 skcm:1 paad:1                                               | SUBCLONAL_FRAC ALIGNABILITY                          |
| UPF2         | E1033       | D:9         | 2.5833555553742e-11   | 9  | coadread:5 stad:3 ucec:1                                                  | LOCAL_ENTROPY HOMOPOLYMER                            |
| UPF3A        | L91         | L:59        | 5.72433593667261e-144 | 59 | acc:18 kirp:8 paad:7 blca:6 skcm:4 lhic:4 prad:3 gg:3 mbi:2 kirc:2 lusc:1 | MANUAL_REVIEW                                        |
| UQCRRF51     | I83         | V:6         | 3.13547105760555e-07  | 6  | kirc:3 lhic:1 kich:1 cesc:1                                               | MANUAL_REVIEW                                        |
| URI1         | D306        | D:12        | 3.72558187313579e-18  | 12 | lhic:7 kirc:2 coadread:2 kich:1                                           | MANUAL_REVIEW                                        |
| USP6         | V148        | V:9         | 1.20350668536188e-05  | 9  | coadread:7 ov:1 cesc:1                                                    | LOW_AF_FRAC                                          |
| VCX3A        | L164        | P:3         | 0.00895299126175147   | 3  | lhic:2 coadread:1                                                         | ALIGNABILITY                                         |

|         |       |              |                       |    |                                                                      |                                                       |
|---------|-------|--------------|-----------------------|----|----------------------------------------------------------------------|-------------------------------------------------------|
| VEGFB   | T187  | P:6          | 3.03719530739835e-08  | 6  | luad:2  gg:2 skcm:1  lhc:1                                           | MANUAL_REVIEW                                         |
| VEGFB   | G189  | G:4          | 0.000172288710688209  | 4  | skcm:1 paad:1  luad:1  lhc:1                                         | MANUAL_REVIEW                                         |
| VEZF1   | Q349  | Q:10         | 2.48203714494652e-13  | 10 | lh:7 ucec:1  kich:1 acc:1                                            | LOW_AF_FRAC LOCAL_ENTROPY ALIGNABILITY                |
| VSI610  | E467  | E:6          | 0.0006435366379402088 | 6  | coadread:4  lhc:2                                                    | LOW_AF_FRAC LOCAL_ENTROPY HOMOPOLYMER                 |
| VSI610  | E472  | E:5          | 0.0084041970058982    | 5  | lh:4 coadread:1                                                      | LOCAL_ENTROPY HOMOPOLYMER ALIGNABILITY                |
| WASF2   | P395  | P:4 S:1      | 8.27504286641528e-05  | 5  | skcm:1 paad:1  luad:1 kirp:1 hns:1                                   | LOCAL_ENTROPY HOMOPOLYMER                             |
| WASH4P  | S232  | S:11         | 3.63380720373202e-18  | 11 | skcm:4 paad:2 gbm:2 prad:1  luad:1 kirc:1                            | ALIGNABILITY                                          |
| XIRP1   | P26   | P:5          | 0.000778819511991384  | 5  | luad:3  lhc:1 lgg:1                                                  | LOCAL_ENTROPY                                         |
| XIRP2   | E831  | K:11         | 3.30850284442815e-07  | 11 | skcm:10 csc:1                                                        | LOCAL_ENTROPY                                         |
| XPNPEP1 | C545  | C:7          | 0.00862769508314815   | 7  | paad:3 usc:2  luad:2                                                 | LOW_AF_FRAC                                           |
| ZC3H11A | I777  | T:4 M:1      | 0.00039690658460148   | 5  | lh:3 paad:1 hns:1                                                    | ALIGNABILITY                                          |
| ZC3H11A | L801  | P:4          | 0.00298836650414597   | 4  | ucs:2 paad:1  lhc:1                                                  | FP_RICH_GENE                                          |
| ZC3H11A | S805  | *:17         | 3.5927148182281e-18   | 17 | lh:9 paad:6 ucs:1 prad:1                                             | LOW_AF_FRAC                                           |
| ZC3H4   | E779  | Q:6          | 0.00539916461856411   | 6  | stad:5 coadread:1                                                    | LOCAL_ENTROPY                                         |
| ZCCHC6  | K937  | E:4 N:2      | 4.34363114670956e-07  | 6  | lh:4 kirc:2                                                          | MANUAL_REVIEW                                         |
| ZDHHC11 | K314  | K:5          | 0.000740587012456175  | 5  | hns:2 paad:1  lhc:1 acc:1                                            | MANUAL_REVIEW                                         |
| ZFH3    | G3519 | G:22         | 3.33330077082536e-41  | 22 | paad:9 hns:5 prad:2  luad:2  gg:2 skcm:1  usc:1                      | SUBCLONAL_FRAC LOCAL_ENTROPY HOMOPOLYMER ALIGNABILITY |
| ZFH3    | G3520 | G:22         | 5.3593523784751e-22   | 22 | paad:12 hns:5 skcm:2 prad:1  luad:1 kirp:1                           | LOCAL_ENTROPY HOMOPOLYMER ALIGNABILITY                |
| ZFR     | A294  | A:7          | 7.97387088824447e-09  | 7  | paad:3 hns:2 stad:1 kirp:1                                           | HOMOPOLYMER                                           |
| ZNF181  | V305  | G:8          | 6.24379005561425e-10  | 8  | luad:2 gbm:2  usc:1  lhc:1 kich:1 hns:1                              | SUBCLONAL_FRAC ALIGNABILITY                           |
| ZNF181  | F330  | S:3 V:1      | 0.00607490785146313   | 4  | ucec:1 skcm:1 prad:1  lhc:1                                          | FP_RICH_GENE                                          |
| ZNF195  | K520  | K:5          | 0.00134014590687774   | 5  | paad:4 blca:1                                                        | FP_RICH_GENE                                          |
| ZNF195  | K576  | K:7          | 2.72113861053752e-07  | 7  | paad:3  luad:3 skcm:1                                                | LOW_AF_FRAC ALIGNABILITY                              |
| ZNF208  | I647  | S:13         | 3.20644424183965e-13  | 13 | prad:4  luad:3 paad:2 blca:2 skcm:1  gg:1                            | LOW_AF_FRAC                                           |
| ZNF254  | Q361  | Q:5          | 0.00886798046309      | 5  | paad:3 skcm:1  luad:1                                                | ALIGNABILITY                                          |
| ZNF254  | S498  | A:6          | 2.0121438706825e-05   | 6  | paad:2 skcm:1 prad:1  luad:1 hns:1                                   | LOW_AF_FRAC                                           |
| ZNF285  | P455  | Q:6 S:1      | 0.000471876930534477  | 7  | acc:2 skcm:1  lhc:1 kirc:1 kich:1 cesc:1                             | ALIGNABILITY                                          |
| ZNF285  | S468  | S:6          | 0.00175569787645247   | 6  | lh:2 kirc:1  kich:1 brca:1 acc:1                                     | ALIGNABILITY                                          |
| ZNF343  | S475  | S:4          | 0.00575792735496963   | 4  | skcm:1 paad:1  luad:1 gbm:1                                          | MANUAL_REVIEW                                         |
| ZNF347  | G566  | G:12         | 6.1641486230632e-18   | 12 | paad:10  luad:1  gbm:1                                               | LOW_AF_FRAC                                           |
| ZNF384  | Q514  | Q:5          | 0.000666520239763311  | 5  | lh:3 coadread:2                                                      | HOMOPOLYMER ALIGNABILITY                              |
| ZNF443  | S235  | P:4 C:1      | 0.00140340807825982   | 5  | paad:2 prad:1 coadread:1  blca:1                                     | ALIGNABILITY                                          |
| ZNF443  | P615  | P:10 L:1     | 9.36961077032642e-06  | 11 | paad:3 skcm:2  luad:2  gg:2 prad:1 esca:1                            | LOW_AF_FRAC                                           |
| ZNF493  | S417  | S:13         | 4.44370243508464e-16  | 13 | paad:5 skcm:2  luad:2 prad:1  gg:1 blca:1 acc:1                      | SUBCLONAL_FRAC                                        |
| ZNF519  | H431  | Y:2 H:2 P:1  | 0.00089454247818693   | 5  | kirc:5                                                               | ALIGNABILITY                                          |
| ZNF534  | A579  | A:12         | 2.37301876272589e-05  | 12 | kirc:4 gbm:2 blca:2 skcm:1 paad:1  luad:1 hns:1                      | LOW_AF_FRAC                                           |
| ZNF563  | T373  | A:7          | 3.50335595980035e-07  | 7  | paad:4 prad:1  luad:1 blca:1                                         | SUBCLONAL_FRAC LOW_AF_FRAC                            |
| ZNF658  | I255  | T:4          | 0.00517659444383035   | 4  | lh:3 coadread:1                                                      | MANUAL_REVIEW                                         |
| ZNF681  | K405  | Q:5          | 0.000658804131676728  | 5  | luad:2 kirp:2 paad:1                                                 | ALIGNABILITY                                          |
| ZNF681  | S505  | P:5          | 0.000845515714752393  | 5  | luad:3 paad:1  gg:1                                                  | ALIGNABILITY                                          |
| ZNF705B | I90   | L:7          | 9.66942195540792e-11  | 7  | kirc:2 brca:2  luad:1 hns:1 acc:1                                    | SUBCLONAL_FRAC ALIGNABILITY                           |
| ZNF706  | I8    | N:8          | 1.10863518453707e-08  | 8  | blca:3 hns:2 skcm:1  luad:1  gg:1                                    | SUBCLONAL_FRAC                                        |
| ZNF708  | K417  | E:7          | 1.2578342093275e-07   | 7  | luad:3 skcm:1 paad:1 cesc:1 brca:1                                   | MANUAL_REVIEW                                         |
| ZNF709  | T413  | I:14         | 5.4933803219954e-18   | 14 | paad:4 prad:3  luad:3  gg:3 gbm:1                                    | LOW_AF_FRAC                                           |
| ZNF717  | D49   | D:13         | 4.88119683318451e-11  | 13 | paad:4  gg:3  luad:2 gbm:2 ucs:1 hns:1                               | MANUAL_REVIEW                                         |
| ZNF749  | Q457  | E:5          | 0.00408416928424879   | 5  | blca:2 skcm:1 paad:1  luad:1                                         | SUBCLONAL_FRAC                                        |
| ZNF780A | S273  | A:4          | 0.00303344049266764   | 4  | skcm:1 paad:1  usc:1  luad:1                                         | SUBCLONAL_FRAC                                        |
| ZNF780A | E562  | E:4 K:1      | 0.00586382299530963   | 5  | paad:3 skcm:1 csc:1                                                  | ALIGNABILITY                                          |
| ZNF780A | Q600  | H:13         | 3.60915269407075e-17  | 13 | prad:5 paad:5  luad:2 blca:1                                         | SUBCLONAL_FRAC LOW_AF_FRAC                            |
| ZNF799  | S435  | S:4          | 0.0028026789000324    | 4  | prad:3 acc:1                                                         | FP_RICH_GENE                                          |
| ZNF799  | E589  | G:23         | 2.85029072576978e-47  | 23 | paad:11 prad:4  luad:2  gg:2 blca:2 skcm:1  gbm:1                    | SUBCLONAL_FRAC                                        |
| ZNF814  | K295  | K:5          | 0.00279161445964502   | 5  | luad:1  lhc:1 kirp:1 cesc:1 acc:1                                    | FP_RICH_GENE                                          |
| ZNF814  | E297  | *:7          | 0.00733894397588765   | 7  | coadread:7                                                           | LOW_AF_FRAC                                           |
| ZNF814  | G320  | E:28 G:20    | 1.65886427117336e-67  | 48 | coadread:39 kirp:4 acc:3 kich:1 csc:1                                | SUBCLONAL_FRAC LOW_AF_FRAC CENTER_BIAS ALIGNABILITY   |
| ZNF814  | R322  | K:26         | 1.4587522434273e-26   | 26 | coadread:16 kirp:4 acc:3 kich:2 csc:1                                | SUBCLONAL_FRAC LOW_AF_FRAC CENTER_BIAS                |
| ZNF814  | P323  | H:19         | 7.09949435437709e-22  | 19 | coadread:34 acc:3 kirp:2 kich:1                                      | SUBCLONAL_FRAC LOW_AF_FRAC CENTER_BIAS                |
| ZNF814  | S332  | S:81         | 4.45851145762234e-106 | 81 | lh:28 acc:9 hns:8  luad:7 coadread:6 skcm:5 prad:5 paad:4 gbm:3      | ALIGNABILITY                                          |
| ZNF814  | A337  | V:43         | 4.83511496756784e-74  | 43 | lh:23 acc:9 kich:4 coadread:3 prad:1 hns:1  gbm:1 gbc:1              | ALIGNABILITY                                          |
| ZNF814  | D404  | E:75         | 8.7570110761509e-158  | 75 | hns:13  luad:11 paad:9 gbm:9 ucs:5  lhc:5  gg:5 blca:5 prad:4 kirc:4 | ALIGNABILITY                                          |
| ZNF814  | H682  | H:10         | 1.57741001586382e-11  | 10 | acc:5 lhc:3 kirp:2                                                   | FP_RICH_GENE                                          |
| ZNF816  | G185  | S:8          | 0.00475137838928593   | 8  | lh:5 coadread:3                                                      | MANUAL_REVIEW                                         |
| ZNF83   | G267  | G:14         | 1.66145588948921e-23  | 14 | blca:12 coadread:1 cesc:1                                            | FP_RICH_GENE                                          |
| ZNF83   | E293  | E:17         | 6.25997836900107e-24  | 17 | blca:16 coadread:1                                                   | ALIGNABILITY                                          |
| ZNF844  | R447  | P:13 H:1     | 5.36290387579357e-10  | 14 | paad:4 gbm:3  luad:2 skcm:1 prad:1  gg:1 hns:1 coadread:1            | SUBCLONAL_FRAC LOW_AF_FRAC ALIGNABILITY               |
| ZNF844  | F487  | L:10         | 3.17551461393979e-14  | 10 | skcm:3 gbm:2 prad:1 paad:1  luad:1  gg:1 hns:1                       | FP_RICH_GENE                                          |
| ZNF844  | P503  | R:9          | 9.43215129206186e-09  | 9  | paad:2 hns:2 blca:2 skcm:1  gg:1 gbm:1                               | SUBCLONAL_FRAC LOW_AF_FRAC ALIGNABILITY               |
| ZNF844  | H514  | D:12         | 7.00848692815437e-17  | 12 | skcm:6 paad:4  luad:1  gg:1                                          | SUBCLONAL_FRAC LOW_AF_FRAC                            |
| ZNF844  | K523  | E:4          | 0.000458127646742066  | 4  | skcm:2 paad:1 blca:1                                                 | SUBCLONAL_FRAC                                        |
| ZNF845  | T479  | M:5 T:3  L:1 | 1.68343916441765e-10  | 9  | skcm:4 paad:2 blca:2 ucec:1                                          | SUBCLONAL_FRAC LOW_AF_FRAC ALIGNABILITY               |
| ZNF845  | R925  | H:40         | 9.92768281120482e-45  | 40 | paad:13 prad:5  luad:5  gg:4 hns:4 skcm:2 kirc:2 ucs:1  lhc:1 kich:1 | SUBCLONAL_FRAC                                        |
| ZNF845  | K934  | K:43         | 5.0153273930527e-59   | 43 | paad:15 hns:7  luad:5 prad:4  gg:4 kirc:2 skcm:1  hns:1 lhc:1 kich:1 | SUBCLONAL_FRAC ALIGNABILITY                           |
| ZNF845  | C945  | R:16         | 2.53833986400246e-25  | 16 | paad:8 hns:3 prad:1  luad:1  gg:1 kirc:1 kich:1                      | ALIGNABILITY                                          |
| ZNF878  | R153  | S:7          | 2.39160540243325e-06  | 7  | paad:3 prad:1  luad:1  gg:1 blca:1                                   | SUBCLONAL_FRAC LOW_AF_FRAC                            |
| ZNF878  | S181  | R:8          | 1.55235779317071e-08  | 8  | paad:4 blca:2 skcm:1 prad:1                                          | SUBCLONAL_FRAC LOW_AF_FRAC                            |

|        |      |          |                      |    |                                                            |
|--------|------|----------|----------------------|----|------------------------------------------------------------|
| ZNF880 | Q406 | R:5      | 3.43354478524647e-05 | 5  | lih:3 kirc:2                                               |
| ZNF91  | H305 | R:14     | 3.91331945354258e-20 | 14 | paad:4 lgg:3 prad:2 blca:2 skcm:1 luad:1 esca:1            |
| ZNF91  | R333 | H:16 C:1 | 1.27820368170425e-10 | 17 | prad:5 paad:4 coadread:2 blca:2 ucec:1 skcm:1 luad:1 lgg:1 |
| ZNF91  | K353 | E:5      | 0.000362961944066391 | 5  | paad:3 lusc:1 blca:1                                       |
| ZXDB   | G206 | R:12     | 2.45382765111082e-10 | 12 | skcm:2 prad:2 paad:2 luad:2 kirp:2 lusc:1 hns:1            |

ALIGNABILITY  
SUBCLONAL\_FRAC|LOW\_AF\_FRAC|ALIGNABILITY  
SUBCLONAL\_FRAC|LOW\_AF\_FRAC|ALIGNABILITY  
ALIGNABILITY  
LOW\_AF\_FRAC

|                       |                                                                                   |
|-----------------------|-----------------------------------------------------------------------------------|
| <b>ALIGNABILITY</b>   | Mutations removed due to poor regional alignability                               |
| <b>CENTER_BIAS</b>    | Mutations removed due to suspected mutations-calling center bias                  |
| <b>FP_MUTSIG</b>      | Mutations removed due as likely passenger mutation                                |
| <b>FP_RICH_GENE</b>   | Mutations removed in genes where major of suspected variants were false-positives |
| <b>HOMOPOLYMER</b>    | Mutations removed due to adjacent to homopolymer region                           |
| <b>LOCAL_ENTROPY</b>  | Mutations removed due to low entropy in surrounding genomic region                |
| <b>LOW_AF_FRAC</b>    | Mutations removed due to consistent low allele frequencies                        |
| <b>MANUAL_REVIEW</b>  | Mutations removed after manual review of representative samples                   |
| <b>SUBCLONAL_FRAC</b> | Mutations removed due due to consistent subclonality                              |

**Supplementary Table 4: Statistical associations of mutant alleles and tumor types (see main text Figure 3A)**

| Gene        | Genotype1       | Genotype2                                | Tumor1                 | Tumor2                           | Nominal p-value                  |                                  |
|-------------|-----------------|------------------------------------------|------------------------|----------------------------------|----------------------------------|----------------------------------|
| <b>KRAS</b> | G12             | G13, G60, Q61, K117, A146                | STAD, MMYL             | PAAD, COADREAD, LUAD, UCEC       | 5.25518E-18                      |                                  |
|             |                 |                                          | STAD                   | PAAD, COADREAD, LUAD, UCEC, MMYL | 8.91279E-05                      |                                  |
|             |                 |                                          | MMYL                   | PAAD, COADREAD, LUAD, UCEC, STAD | 9.4826E-15                       |                                  |
|             |                 |                                          | STAD                   | MMYL                             | 0.04203039                       |                                  |
|             | Q61             | G12, G13, G60, K117, A146                | MMYL                   | PAAD, COADREAD, LUAD, UCEC, STAD | 1.38139E-08                      |                                  |
|             |                 |                                          | A146                   | G12, G13, G60, Q61, K117,        | STAD                             | PAAD, COADREAD, LUAD, UCEC, MMYL |
|             |                 |                                          |                        | MMYL                             | PAAD, COADREAD, LUAD, UCEC, STAD | 0.02700479                       |
|             |                 |                                          |                        | COADREAD                         | PAAD, MMYL LUAD, UCEC, STAD      | 3.99186E-07                      |
|             | G13             | G12, G60, Q61, K117, A146                | PAAD                   | MMYL COADREAD, LUAD, UCEC, STAD  | 2.75121E-15                      |                                  |
|             | <b>KRAS G12</b> | G12R                                     | G12A, C, D, F, G, S, V | PAAD                             | LUAD, COADREAD, UCEC, STAD       | 4.76598E-19                      |
| G12C        |                 | G12A, R, D, F, G, S, V                   | LUAD                   | PAAD, COADREAD, UCEC, STAD       | 4.04813E-42                      |                                  |
| G12S        |                 | G12A, C, D, F, G, R, V                   | STAD                   | PAAD, LUAD, COADREAD, UCEC       | 0.007467106                      |                                  |
|             |                 |                                          | COADREAD               | PAAD, LUAD, UCEC, STAD           | 0.000443336                      |                                  |
|             |                 |                                          | STAD, COADREAD         | PAAD, LUAD, UCEC                 | 4.79605E-06                      |                                  |
|             |                 |                                          | STAD                   | COADREAD                         | 0.1198981                        |                                  |
|             |                 |                                          | LUAD                   | PAAD, COADREAD, UCEC, STAD       | 0.00051569                       |                                  |
| G12A        |                 | G12C, D, F, G, R, S, V                   | UCEC                   | PAAD, LUAD, COADREAD, STAD       | 0.03972278                       |                                  |
|             |                 |                                          | COADREAD               | PAAD, LUAD, UCEC, STAD           | 0.3076531                        |                                  |
|             |                 |                                          | LUAD, UCEC, COADREAD   | PAAD, STAD                       | 5.01677E-09                      |                                  |
|             |                 |                                          | LUAD, UCEC             | PAAD, COADREAD, STAD             | 1.47296E-05                      |                                  |
|             |                 |                                          | G12V                   | G12A, C, D, G, F, S              | STAD                             | PAAD, LUAD, COADREAD, UCEC       |
| <b>NRAS</b> |                 | G12                                      | G13, Q61               | LAML                             | SKCM, MMYL, COADREAD, THCA       | 0.008986139                      |
|             |                 |                                          |                        | COADREAD                         | SKCM, MMYL, THCA, LAML           | 2.23032E-07                      |
|             |                 |                                          |                        | LAML, COADREAD                   | SKCM, MMYL, THCA                 | 3.96181E-10                      |
|             | LAML            |                                          |                        | COADREAD                         | 0.7634813                        |                                  |
|             | G13             | G12, Q61                                 | LAML, COADREAD         | SKCM, MMYL, THCA                 | 0.005081539                      |                                  |
|             |                 |                                          | Q61                    | G12, G13                         | SKCM                             | MMYL                             |
|             |                 |                                          |                        | SKCM                             | THCA                             | 0.2141752                        |
|             |                 |                                          |                        | MMYL                             | THCA                             | 0.004986217                      |
|             | Q61             | G12, G13                                 | THCA                   | SKCM, MMYL, COADREAD, LAML       | 0.001266157                      |                                  |
|             | <b>HRAS</b>     | G12                                      | G13, Q61               | BLCA                             | HNSC                             | 0.5570423                        |
| HNSC, BLCA  |                 |                                          |                        | THCA                             | 0.002798736                      |                                  |
| G13         |                 | G12, Q61                                 | HNSC, BLCA             | THCA                             | 0.01410535                       |                                  |
| Q61         |                 | G12, G13                                 | THCA                   | HNSC, BLCA, THCA                 | 4.09928E-07                      |                                  |
| Q61         |                 | G12, G13                                 | BLCA                   | HNSC                             | 0.04917457                       |                                  |
| <b>BRAF</b> | V600            | D594, G466, G469, G596, K601, L597, N581 | MMYL                   | COADREAD, LUAD, SKCM, THCA       | 3.14767E-09                      |                                  |
|             |                 |                                          | LUAD                   | COADREAD, MMYL, SKCM, THCA       | 8.46429E-22                      |                                  |
|             |                 |                                          | LUAD                   | MMYL                             | 0.7483487                        |                                  |

|                  |                            |                               |                      |                                        |             |
|------------------|----------------------------|-------------------------------|----------------------|----------------------------------------|-------------|
|                  |                            |                               | MMYL, LUAD           | COADREAD, SKCM, THCA                   | 1.85069E-32 |
|                  |                            |                               | SKCM                 | THCA                                   | 1.85069E-32 |
|                  |                            |                               | SKCM                 | COADREAD                               | 0.7761931   |
|                  |                            |                               | THCA                 | COADREAD                               | 0.003119319 |
| <b>ERBB2</b>     | S310                       | R678, D769, L755, V777, V842  | BLCA                 | BRCA, COADREAD, STAD                   | 0.005702238 |
|                  |                            |                               | STAD                 | BLCA, BRCA, COADREAD                   | 1           |
|                  |                            |                               | BRCA                 | BLCA, COADREAD, STAD                   | 0.2074894   |
|                  | L755                       | S310, R678, D769, V777, V842  | BRCA                 | BLCA, COADREAD, STAD                   | 0.0266505   |
|                  | R678                       | S310, D769, L755, V777, V842  | BRCA                 | BLCA, COADREAD, STAD                   | 0.1726144   |
|                  | V842                       | S310, R678, D769, L755, V777  | COADREAD             | BLCA, BRCA, STAD                       | 0.03532599  |
|                  |                            |                               | COADREAD, STAD       | BLCA, BRCA                             | 0.02163419  |
| <b>EGFR</b>      | Extracellular (R108, A289) | Rest (G598, G719, L858, L861) | LUAD                 | GBM, LGG                               | 3.2936E-12  |
| <b>SF3B1</b>     | R625                       | N626, K666, K700, G742, D894  | SKCM                 | CLL, BRCA                              | 0.000115969 |
|                  | K700                       | R625, N626, K666, G742, D894  | BRCA                 | CLL                                    | 0.02034313  |
|                  | G742                       | R625, N626, K666, K700, D894  | CLL                  | BRCA, SKCM                             | 0.05062025  |
| <b>IDH1 R132</b> | R132C                      | R132G, H, L, S                | SKCM, LAML           | LGG, GBM                               | 3.85937E-21 |
|                  |                            |                               | SKCM                 | LGG, GBM, LAML                         | 6.30348E-13 |
|                  |                            |                               | LAML                 | LGG, GBM, SKCM                         | 1.69675E-07 |
|                  |                            |                               | SKCM                 | LAML                                   | 0.1279098   |
|                  | R132H                      | R132C, G, L, S                | LGG                  | GBM, LAML, SKCM                        | 0.1279098   |
|                  |                            |                               | GBM                  | LGG, LAML, SKCM                        | 0.7745059   |
|                  |                            |                               | LGG, GBM             | LAML, SKCM                             | 0.4425998   |
|                  |                            |                               | LGG                  | GBM                                    | 4.36188E-21 |
| <b>PIK3CA</b>    | R88                        | non-R88                       | COADREAD             | BLCA, BRCA, CESC, HNSC, STAD, UCEC     | 3.8875E-06  |
|                  |                            |                               | UCEC                 | BLCA, BRCA, CESC, COADREAD, HNSC, STAD | 0.00342361  |
|                  |                            |                               | STAD                 | BLCA, BRCA, CESC, COADREAD, HNSC, UCEC | 0.2864947   |
|                  |                            |                               | COADREAD, UCEC, STAD | BLCA, BRCA, CESC, UCEC                 | 1.28133E-11 |
|                  |                            |                               | COADREAD             | STAD                                   | 0.3101641   |
|                  | E545                       | non-E545                      | COADREAD             | BLCA, BRCA, CESC, HNSC, STAD, UCEC     | 0.2170138   |
|                  |                            |                               | BRCA                 | BLCA, CESC, COADREAD, HNSC, STAD, UCEC | 0.000952565 |
|                  |                            |                               | BLCA                 | BRCA, CESC, COADREAD, HNSC, STAD, UCEC | 0.000103157 |
|                  |                            |                               | CESC                 | BLCA, BRCA, COADREAD, HNSC, STAD, UCEC | 9.87721E-05 |
|                  |                            |                               | HNSC                 | BLCA, BRCA, CESC, COADREAD, STAD, UCEC | 0.0264278   |
|                  | Helical (E542, E545, Q546) | non-Helical                   | BLCA                 | BRCA, CESC, COADREAD, HNSC, STAD, UCEC | 8.41145E-07 |
|                  |                            |                               | BRCA                 | BLCA, CESC, COADREAD, HNSC, STAD, UCEC | 0.000056258 |
|                  |                            |                               | CESC                 | BLCA, BRCA, COADREAD, HNSC, STAD, UCEC | 3.61602E-06 |
|                  |                            |                               | HNSC                 | BLCA, BRCA, CESC, COADREAD, STAD, UCEC | 0.000819398 |
|                  |                            |                               | HNSC                 | BLCA                                   | 0.04256738  |
|                  |                            |                               | CESC                 | BLCA                                   | 0.6199027   |

H1047

non-H1047

HNSC  
BRCA

BLCA  
BLCA, CESC, COADREAD, HNSC, STAD, UCEC

0.1293245  
4.85455E-19

---

**Supplementary Table 5: GQ60GK and G60 mutations in Ras genes**

| <b>Gene</b> | <b>Genomic</b> | <b>cDNA</b>    | <b>Protein</b> | <b>Tumor type</b>         | <b>Hypermutated</b> | <b>Alternative MAPK driver</b> |
|-------------|----------------|----------------|----------------|---------------------------|---------------------|--------------------------------|
| <i>NRAS</i> | GT>TG          | c.180_181AC>CA | GQ60GK (Q61K)  | Cutaneous melanoma        | No                  | --                             |
| <i>KRAS</i> | GA>TT          | c.180_181TC>AA | GQ60GK (Q61K)  | Pancreatic adenocarcinoma | No                  | --                             |
|             |                |                |                | Transitional cell bladder | No                  | --                             |
|             |                |                |                | Colorectal                | MSI-H               | --                             |
|             |                |                |                | Colorectal                | MSI-H               | --                             |
|             |                |                |                | Colorectal                | MSI-H               | Subclonal BRAF R509*           |
|             |                |                |                | Papillary thyroid         | No                  | Subclonal BRAF V600E           |
|             |                |                |                | Papillary thyroid         | No                  | --                             |
|             |                |                |                | Multiple myeloma          | No                  | --                             |
|             |                |                |                | Colorectal                | No                  | --                             |
|             |                |                |                | Cutaneous melanoma        | No                  | --                             |
|             | GA>TG          | c.180_181TC>CA | GQ60GK (Q61K)  | Colorectal                | No                  | --                             |
|             | GA>TC          | c.180_181TC>GA | GQ60GK (Q61K)  | Cutaneous melanoma        | No                  | --                             |
| <i>KRAS</i> | C>T            | c.179G>A       | G60D           | Squamous cell carcinoma   | Yes                 | BRAF S129L                     |
| <i>HRAS</i> | C>T            | c.178G>A       | G60S           | Colorectal                | No                  |                                |

Note: three additional G60 mutations are present in COSMIC (G60D/V/A in a CMML, colorectal metastasis, and papillary thyroid cancer respectively)
